# Supplementary material for: What is the difference between mono- and biphosphine ligands? Revealing the chemoselectivity in Pd-catalysed carbenation of bromonaphthalene
Source: Royal Society of Chemistry journal article supplement (doi:10.1039/d2qo00910b), 2022-01-01
Supplement: d2qo00910b1.pdf [file d2qo00910b1.pdf]

**Supplementary Information**  
**for**  
**What is the difference between mono- and biphosphine**  
**ligand? Revealing the chemoselectivity in Pd-catalysed**  
**carbenation of bromonaphthalene**

Wenting Gong,<sup>a</sup> Dongmin Fu,<sup>c</sup> Kangbao Zhong,<sup>b</sup> Hao Ni,<sup>b</sup> Xiaoqian He,<sup>b</sup> Chunhui Shan,<sup>\*a</sup> Rong Li,<sup>\*a</sup>  
and Yu Lan<sup>\*b,c</sup>

<sup>a</sup> Chongqing Key Laboratory of Inorganic Functional Materials, College of Chemistry, Chongqing Normal University, Chongqing 401331, China.

<sup>b</sup> School of Chemistry and Chemical Engineering, Chongqing Key Laboratory of Theoretical and Computational Chemistry, Chongqing University, Chongqing 400030, China

<sup>c</sup> Green Catalysis Center, and College of Chemistry, Zhengzhou University, Zhengzhou, Henan 450001, China.

[chunhui.shan@cqu.edu.cn](mailto:chunhui.shan@cqu.edu.cn) (Chunhui shan); [rongli258@163.com](mailto:rongli258@163.com) (Rong Li); [lanyu@cqu.edu.cn](mailto:lanyu@cqu.edu.cn) (Yu Lan)

## *Table of Content*

|                                                                            |           |
|----------------------------------------------------------------------------|-----------|
| <b>1. Complete reference for Gaussian 09 .....</b>                         | <b>S3</b> |
| <b>2. Mechanistic study for another possible pathway .....</b>             | <b>S3</b> |
| <b>3. Cartesian coordinates and energies of optimized structures .....</b> | <b>S7</b> |

## 1. Complete reference for Gaussian 09

Gaussian 09, Revision D.01, M. J. Frisch, G. W. Trucks, H. B. Schlegel, G. E. Scuseria, M. A. Robb, J. R. Cheeseman, G. Scalmani, V. Barone, B. Mennucci, G. A. Petersson, H. Nakatsuji, M. Caricato, X. Li, H. P. Hratchian, A. F. Izmaylov, J. Bloino, G. Zheng, J. L. Sonnenberg, M. Hada, M. Ehara, K. Toyota, R. Fukuda, J. Hasegawa, M. Ishida, T. Nakajima, Y. Honda, O. Kitao, H. Nakai, T. Vreven, J. A. Montgomery, Jr., J. E. Peralta, F. Ogliaro, M. Bearpark, J. J. Heyd, E. Brothers, K. N. Kudin, V. N. Staroverov, T. Keith, R. Kobayashi, J. Normand, K. Raghavachari, A. Rendell, J. C. Burant, S. S. Iyengar, J. Tomasi, M. Cossi, N. Rega, J. M. Millam, M. Klene, J. E. Knox, J. B. Cross, V. Bakken, C. Adamo, J. Jaramillo, R. Gomperts, R. E. Stratmann, O. Yazyev, A. J. Austin, R. Cammi, C. Pomelli, J. W. Ochterski, R. L. Martin, K. Morokuma, V. G. Zakrzewski, G. A. Voth, P. Salvador, J. J. Dannenberg, S. Dapprich, A. D. Daniels, O. Farkas, J. B. Foresman, J. V. Ortiz, J. Cioslowski, and D. J. Fox, Gaussian, Inc., Wallingford CT, 2013.

## 2. Mechanistic study for another possible pathway

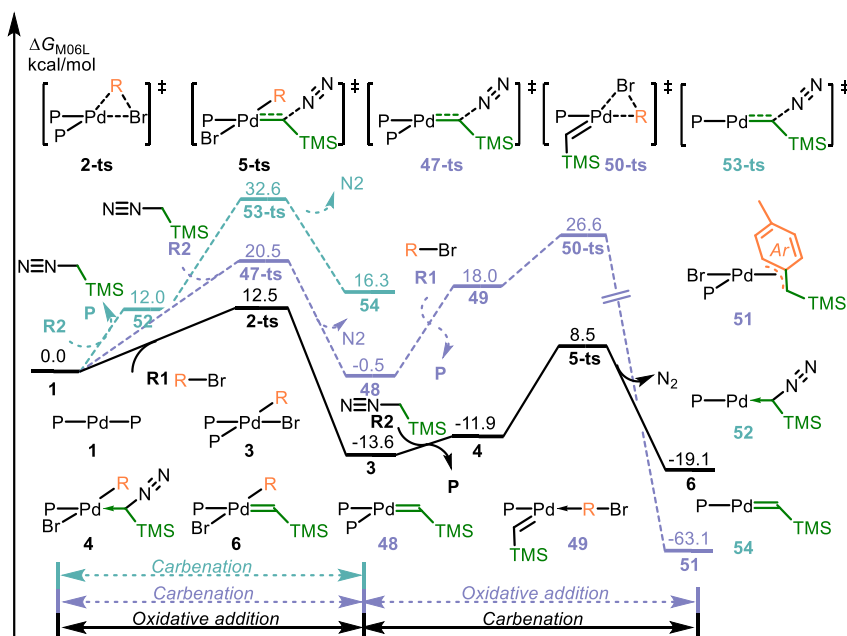

**Fig S1.** Free energy profiles for the carbonation and oxidative addition steps of Pd-catalysed dearomatization. Energies are in kcal/mol and represent the relative free energies, which were calculated using the M06-L method in 1,4-dioxane.

Another possible mechanism, the order of the conversion steps is carbenation followed by oxidative addition, which is also considered in Fig. S1. The reaction starts from a phosphine-coordinated Pd(0) species **1**. The carbenation occurs via the transition state **47-ts** with an energy barrier of 20.5 kcal/mol, releasing nitrogen to give the Pd(II)-carbene complex **48**. The relative free energy of the transition state **47-ts** is 8.0 kcal/mol higher than that of transition state **2-ts**. Ligand exchange with bromonaphthalene **R1** forms intermediate **49** with an endothermic energy of 18.5 kcal/mol. Oxidative addition via a three-membered-ring transition state **50-ts** occurs with an energy barrier of 27.1 kcal/mol, giving a square-planar aryl-Pd(II) intermediate **51**, indicating that the step of carbenation is unfavorable. Similarly, carbenation occurs with assistance of one monophosphine-coordinated Pd(0) is also considered (green line). The energy barrier of this pathway is 32.6 kcal/mol, which is 20.1 kcal/mol higher than that of Path **a**. The results indicates carbenation with assistance of Pd(0) is unfavorable.

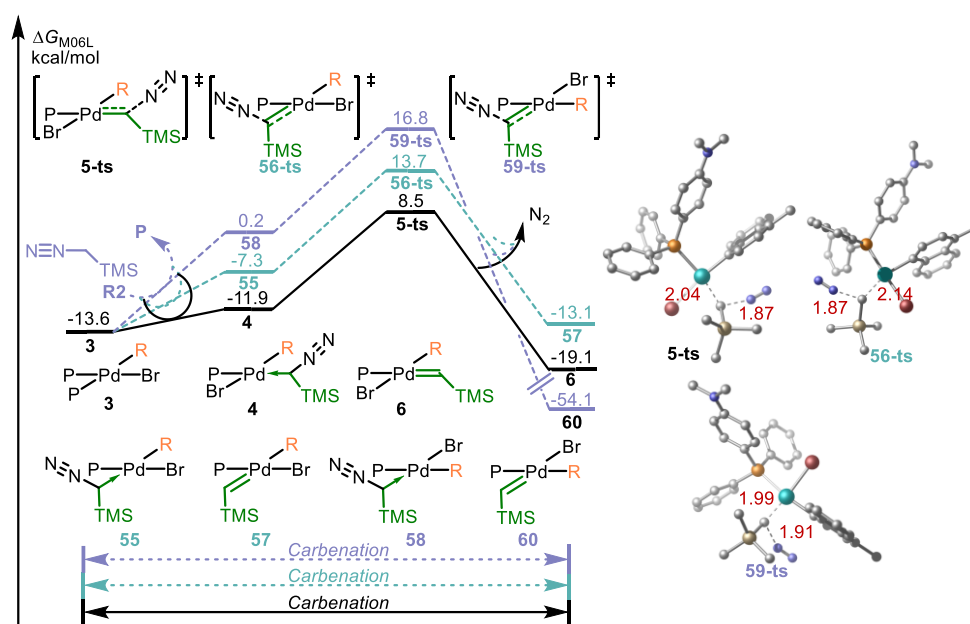

**Fig S2.** Free energy profiles for carbenation pathways of Pd-catalysed dearomatization. Energies are in kcal/mol and represent the relative free energies, which were calculated using the M06-L method in 1,4-dioxane. Bond lengths are in angstroms.

When intermediate **3** is formed, the corresponding carbenation pathways (black line, green line and purple line) should be considered. The calculated free energy profiles are shown in Fig S2. Ligand exchange with TMS-diazomethane **R2** forms complex **4**, **55** and **58** with an endothermic energy of 1.7, 6.3 and 13.8 kcal/mol, respectively. Subsequent the relative activation free energies of carbenation via transition states **5-ts**, **56-ts** and **59-ts** for the generation of aryl palladium intermediate **6**, **57** and alkyl palladium **60** are 8.5, 13.7 and 16.8 kcal/mol, respectively. In **5-ts**, the smaller bromide anion is at the left side, which would engender less repulsion with the large site of the ligand. However, in **56-ts** and

**59-ts**, when bromide anion is at the right side, the larger TMS-diazomethane moiety would have a larger repulsion with the ligand. Therefore, the calculated relative free energy of **5-ts** is 5.2 and 8.3 kcal/mol lower than that of **56-ts** and **59-ts**. These results indicate that generation of intermediate **6** is dynamically and thermodynamically favorable.

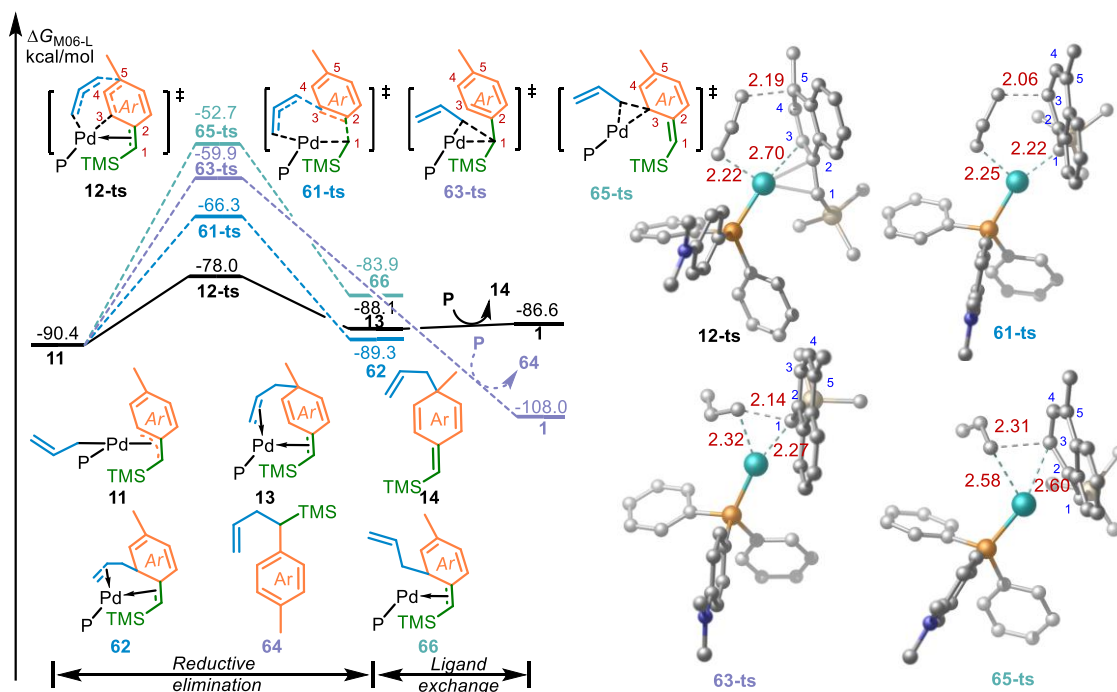

**Fig S3.** Free energy profiles for the dearomative product formation steps of Pd-catalysed dearomatization. Energies are in kcal/mol and represent the relative free energies, which were calculated using the M06-L method in 1,4-dioxane. Bond lengths are in angstroms.

Having obtained key intermediate **11**, the possible pathways of reductive elimination for this intermediate was considered theoretically (Fig. S3). DFT calculations found that the free energy barrier of generate reductive elimination products via transition states **12-ts**, **61-ts**, **63-ts** and **65-ts** are 12.4, 24.1, 30.5 and 37.7 kcal/mol, respectively. As seen from all the structures, **12-ts** has four coordination sites, one more than that of **61-ts**, leading to the free energy of **12-ts** is 11.7 kcal/mol lower than **61-ts**. We also found that the three-membered-ring tension is usually stronger than the seven-membered-ring tension. Therefore, we proposed that the reductive elimination of seven-membered-ring transition states **12-ts** would be easier than that three-membered ring transition states **63-ts** and **65-ts**. The calculation supports this proposal. These pathways could also be excluded. Based on the mentioned above, these clearly showed that compound **13** was the kinetic product, which can be obtained from **11**. The final dearomative product **14** could be afford by ligand exchange and the active catalyst **1** could be regenerated.

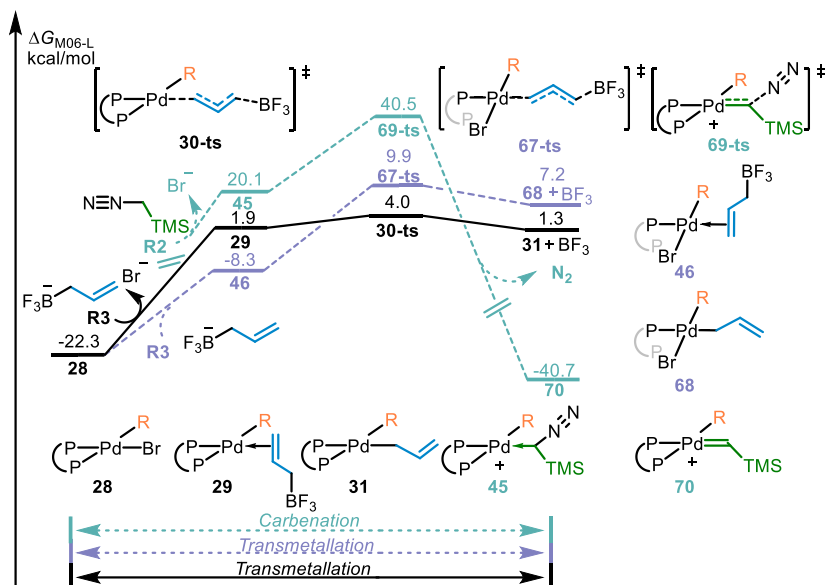

**Fig S4.** Free energy profiles of competitive Suzuki-Miyaura coupling with biphosphine ligand. Energies are in kcal/mol and represent the relative free energies, which were calculated using the M06-L method in 1,4-dioxane.

When arylpalladium(II) intermediate **28** is formed, the coordination of anionic allylborate **R3** gives Pd(II) intermediate **46** with an endothermic free energy of 14.0 kcal/mol owing to entropy loss. Subsequent transmetalation occurs with an endotherm of 18.2 kcal/mol to yield intermediate **68**. The relative free energy of transition state **67-ts** is 5.9 kcal/mol higher than that of path b, indicating that the transmetalation step without dissociating bromide anion is unfavorable. For the arylpalladium(II) intermediate **28**, the subsequent ligand exchange with TMS-diazomethane **R2** forms complex **45** with an endothermic energy of 42.4 kcal/mol. The calculated free energy barrier of carbenation via transition state **69-ts** is 62.8 kcal/mol, which is 36.5 kcal/mol higher than that of transmetalation via transition state **30-ts**, revealing that the carbenation step is unfavorable due to the higher ligand exchange energy.

### 3. Cartesian coordinates and energies of optimized structures

**1**  
B3LYP SCF energy: -2467.17386564 a.u.  
B3LYP enthalpy: -2466.433588 a.u.  
B3LYP free energy: -2466.568845 a.u.  
M06-L SCF energy in solution: -2468.78007925 a.u.  
M06-L enthalpy in solution: -2468.039802 a.u.  
M06-L free energy in solution: -2468.175059 a.u.

Cartesian coordinates

| ATOM | X        | Y         | Z         |
|------|----------|-----------|-----------|
| P    | 2.024888 | 1.128519  | -0.030832 |
| C    | 2.280944 | 2.228274  | -1.504498 |
| C    | 1.169768 | 2.946495  | -1.982344 |
| C    | 3.507999 | 2.358297  | -2.174047 |
| C    | 1.288826 | 3.790532  | -3.088446 |
| H    | 0.202252 | 2.825776  | -1.486119 |
| C    | 3.623507 | 3.195738  | -3.289533 |
| H    | 4.379032 | 1.797823  | -1.828037 |
| C    | 2.517241 | 3.916383  | -3.746913 |
| H    | 0.415644 | 4.342863  | -3.446000 |
| H    | 4.584737 | 3.282434  | -3.803538 |
| H    | 2.608751 | 4.568431  | -4.619696 |
| C    | 3.532360 | 0.069420  | 0.006669  |
| C    | 4.749452 | 0.443033  | 0.600278  |
| C    | 3.469067 | -1.202966 | -0.588286 |
| C    | 5.856793 | -0.402622 | 0.593516  |
| H    | 4.841736 | 1.415043  | 1.090902  |
| C    | 4.567658 | -2.056693 | -0.612885 |
| H    | 2.526416 | -1.534875 | -1.033829 |
| C    | 5.800515 | -1.679543 | -0.020951 |
| H    | 6.771924 | -0.062089 | 1.076791  |
| H    | 4.456993 | -3.031491 | -1.086605 |
| C    | 2.297535 | 2.285001  | 1.395153  |
| C    | 1.867184 | 1.860150  | 2.665189  |
| C    | 2.896966 | 3.548970  | 1.273160  |
| C    | 2.049222 | 2.670835  | 3.787373  |
| H    | 1.374250 | 0.888716  | 2.764235  |
| C    | 3.068836 | 4.365369  | 2.397095  |
| H    | 3.228345 | 3.904741  | 0.295234  |
| C    | 2.649667 | 3.928101  | 3.656093  |
| H    | 1.710014 | 2.324372  | 4.767286  |
| H    | 3.532816 | 5.349157  | 2.284845  |
| H    | 2.783388 | 4.567736  | 4.532594  |
| N    | 6.895339 | -2.522569 | -0.033898 |
| C    | 8.124415 | -2.125356 | 0.620238  |
| H    | 7.985325 | -1.944936 | 1.702980  |
| H    | 8.871799 | -2.921286 | 0.507552  |
| H    | 8.550233 | -1.202730 | 0.183992  |

|    |           |           |           |
|----|-----------|-----------|-----------|
| C  | 6.797578  | -3.829708 | -0.649803 |
| H  | 6.533802  | -3.765237 | -1.721400 |
| H  | 7.766194  | -4.340743 | -0.576405 |
| H  | 6.040142  | -4.471397 | -0.160977 |
| P  | -2.024501 | -1.128432 | 0.031486  |
| C  | -2.296056 | -2.287297 | -1.392766 |
| C  | -2.896186 | -3.550791 | -1.269465 |
| C  | -1.863989 | -1.864754 | -2.663026 |
| C  | -3.067096 | -4.368978 | -2.392297 |
| H  | -3.228881 | -3.904925 | -0.291389 |
| C  | -2.045073 | -2.677172 | -3.784083 |
| H  | -1.370534 | -0.893701 | -2.763141 |
| C  | -2.646242 | -3.933967 | -3.651491 |
| H  | -3.531641 | -5.352372 | -2.278897 |
| H  | -1.704558 | -2.332471 | -4.764156 |
| H  | -2.779170 | -4.574963 | -4.527114 |
| C  | -3.531744 | -0.069095 | -0.009303 |
| C  | -4.748151 | -0.443437 | -0.603827 |
| C  | -3.469210 | 1.203810  | 0.584507  |
| C  | -5.855462 | 0.402240  | -0.599385 |
| H  | -4.839922 | -1.416135 | -1.093131 |
| C  | -4.567809 | 2.057591  | 0.606859  |
| H  | -2.527266 | 1.536015  | 1.031265  |
| C  | -5.799604 | 1.680254  | 0.012886  |
| H  | -6.770166 | 0.061036  | -1.083005 |
| H  | -4.457973 | 3.032593  | 1.080365  |
| C  | -2.282262 | -2.225548 | 1.506866  |
| C  | -1.171715 | -2.942723 | 1.987597  |
| C  | -3.510209 | -2.354437 | 2.175009  |
| C  | -1.292216 | -3.784739 | 3.095135  |
| H  | -0.203495 | -2.822867 | 1.492555  |
| C  | -3.627226 | -3.189836 | 3.291827  |
| H  | -4.380784 | -1.794635 | 1.826825  |
| C  | -2.521511 | -3.909556 | 3.752102  |
| H  | -0.419421 | -4.336275 | 3.454897  |
| H  | -4.589173 | -3.275694 | 3.804639  |
| H  | -2.614214 | -4.560018 | 4.625959  |
| N  | -6.893751 | 2.524132  | 0.021983  |
| C  | -8.126381 | 2.120991  | -0.621706 |
| H  | -8.552011 | 1.203750  | -0.173579 |
| H  | -8.871949 | 2.919514  | -0.515529 |
| H  | -7.991648 | 1.928378  | -1.702722 |
| C  | -6.799387 | 3.828178  | 0.644878  |
| H  | -6.034389 | 4.468716  | 0.166930  |
| H  | -7.765215 | 4.342930  | 0.561378  |
| H  | -6.548089 | 3.759476  | 1.719455  |
| Pd | 0.000255  | 0.000096  | 0.000303  |

**R1**

B3LYP SCF energy: -2998.17335127 a.u.  
 B3LYP enthalpy: -2997.997347 a.u.  
 B3LYP free energy: -2998.044164 a.u.  
 M06-L SCF energy in solution: -2998.67215294 a.u.  
 M06-L enthalpy in solution: -2998.496149 a.u.  
 M06-L free energy in solution: -2998.542966 a.u.

## Cartesian coordinates

| ATOM | X         | Y         | Z         |
|------|-----------|-----------|-----------|
| C    | 1.007501  | 2.776346  | 0.000002  |
| C    | -0.024126 | 1.861393  | 0.000003  |
| C    | 0.231369  | 0.462211  | 0.000001  |
| C    | 1.598815  | 0.004219  | -0.000001 |
| C    | 2.633291  | 0.983594  | -0.000004 |
| C    | 2.350359  | 2.333642  | -0.000002 |
| H    | 0.786056  | 3.846555  | 0.000003  |
| H    | -1.060016 | 2.202474  | 0.000005  |
| C    | -0.802063 | -0.525245 | 0.000002  |
| C    | 1.892255  | -1.402125 | -0.000003 |
| H    | 3.673937  | 0.656435  | -0.000007 |
| H    | 3.164725  | 3.062618  | -0.000004 |
| C    | 0.839547  | -2.297819 | -0.000003 |
| C    | -0.508933 | -1.869747 | 0.000000  |
| H    | 1.045071  | -3.371683 | -0.000006 |
| H    | -1.313780 | -2.606535 | -0.000001 |
| Br   | -2.645651 | -0.007666 | 0.000003  |
| C    | 3.316832  | -1.898179 | -0.000009 |
| H    | 3.872127  | -1.547091 | -0.885992 |
| H    | 3.872127  | -1.547109 | 0.885982  |
| H    | 3.348468  | -2.997102 | -0.000020 |

**2-ts**

B3LYP SCF energy: -5465.31446759 a.u.  
 B3LYP enthalpy: -5464.398501 a.u.  
 B3LYP free energy: -5464.556728 a.u.  
 M06-L SCF energy in solution: -5467.45586166 a.u.  
 M06-L enthalpy in solution: -5466.539895 a.u.  
 M06-L free energy in solution: -5466.698122 a.u.  
 Imaginary frequency: -154.7186 cm<sup>-1</sup>

## Cartesian coordinates

| ATOM | X         | Y        | Z         |
|------|-----------|----------|-----------|
| P    | 1.276697  | 1.258473 | 0.189282  |
| C    | 0.732274  | 2.726456 | -0.820350 |
| C    | -0.563310 | 2.728155 | -1.363298 |

|   |           |           |           |
|---|-----------|-----------|-----------|
| C | 1.571170  | 3.825359  | -1.084056 |
| C | -1.019674 | 3.806051  | -2.128849 |
| H | -1.214739 | 1.867579  | -1.195537 |
| C | 1.116425  | 4.901398  | -1.851522 |
| H | 2.592230  | 3.836004  | -0.696600 |
| C | -0.181415 | 4.896773  | -2.373658 |
| H | -2.031530 | 3.782732  | -2.541674 |
| H | 1.782463  | 5.746427  | -2.046570 |
| H | -0.533448 | 5.737612  | -2.977339 |
| C | 3.100741  | 1.275174  | -0.118118 |
| C | 4.065734  | 1.465414  | 0.883166  |
| C | 3.569835  | 1.069274  | -1.427558 |
| C | 5.430797  | 1.469245  | 0.596298  |
| H | 3.757608  | 1.621749  | 1.918413  |
| C | 4.925560  | 1.084835  | -1.733710 |
| H | 2.857320  | 0.896874  | -2.238132 |
| C | 5.902495  | 1.288927  | -0.726195 |
| H | 6.130577  | 1.622043  | 1.417367  |
| H | 5.223913  | 0.918929  | -2.767778 |
| C | 1.206776  | 1.883371  | 1.941654  |
| C | 1.167378  | 0.923409  | 2.968494  |
| C | 1.209390  | 3.242865  | 2.293401  |
| C | 1.145905  | 1.311660  | 4.310770  |
| H | 1.148671  | -0.138103 | 2.707638  |
| C | 1.175492  | 3.631330  | 3.636885  |
| H | 1.233777  | 4.009657  | 1.517208  |
| C | 1.146686  | 2.668188  | 4.649293  |
| H | 1.118671  | 0.550515  | 5.095013  |
| H | 1.173253  | 4.694689  | 3.891946  |
| H | 1.119275  | 2.973619  | 5.698595  |
| N | 7.253679  | 1.308209  | -1.023595 |
| C | 8.224556  | 1.482100  | 0.035165  |
| H | 8.184250  | 0.669353  | 0.786015  |
| H | 9.235179  | 1.492061  | -0.393424 |
| H | 8.082152  | 2.435860  | 0.575976  |
| C | 7.701502  | 1.062312  | -2.377944 |
| H | 7.300854  | 1.806975  | -3.090347 |
| H | 8.796917  | 1.123493  | -2.416843 |
| H | 7.405366  | 0.061291  | -2.745121 |
| P | -2.501451 | -0.331967 | 0.788864  |
| C | -3.146063 | -1.951695 | 1.421934  |
| C | -2.546568 | -2.511431 | 2.566692  |
| C | -4.140639 | -2.686494 | 0.759181  |
| C | -2.944764 | -3.760468 | 3.044621  |
| H | -1.762213 | -1.959321 | 3.092363  |
| C | -4.530140 | -3.945613 | 1.231963  |
| H | -4.616224 | -2.275671 | -0.133253 |
| C | -3.938056 | -4.485526 | 2.374990  |
| H | -2.473131 | -4.174321 | 3.940013  |
| H | -5.303753 | -4.505386 | 0.699371  |
| H | -4.243803 | -5.468367 | 2.742803  |



|    |           |           |           |
|----|-----------|-----------|-----------|
| C  | -3.689885 | 0.123478  | -0.548052 |
| C  | -4.945388 | 0.709243  | -0.308036 |
| C  | -3.338966 | -0.116642 | -1.888211 |
| C  | -5.812829 | 1.034449  | -1.346931 |
| H  | -5.259781 | 0.924835  | 0.715576  |
| C  | -4.197435 | 0.195587  | -2.939615 |
| H  | -2.368672 | -0.565161 | -2.116796 |
| C  | -5.466066 | 0.782017  | -2.699637 |
| H  | -6.770560 | 1.490509  | -1.098366 |
| H  | -3.869395 | -0.017704 | -3.956286 |
| C  | -2.986226 | 0.840859  | 2.145953  |
| C  | -2.419581 | 2.127165  | 2.136746  |
| C  | -3.902913 | 0.519744  | 3.162630  |
| C  | -2.766741 | 3.069560  | 3.107191  |
| H  | -1.695040 | 2.395838  | 1.366177  |
| C  | -4.243422 | 1.461254  | 4.139614  |
| H  | -4.358109 | -0.471766 | 3.195929  |
| C  | -3.678814 | 2.739174  | 4.114191  |
| H  | -2.310592 | 4.062215  | 3.081561  |
| H  | -4.957198 | 1.191831  | 4.922950  |
| H  | -3.944585 | 3.473713  | 4.879021  |
| N  | -6.324057 | 1.096465  | -3.734858 |
| C  | -7.607125 | 1.707204  | -3.454956 |
| H  | -7.504280 | 2.681677  | -2.942007 |
| H  | -8.141418 | 1.881778  | -4.397673 |
| H  | -8.246940 | 1.065705  | -2.820653 |
| C  | -5.940794 | 0.821099  | -5.104397 |
| H  | -5.745714 | -0.253896 | -5.274490 |
| H  | -6.752874 | 1.123338  | -5.778083 |
| H  | -5.030997 | 1.373619  | -5.405278 |
| Pd | -0.155419 | -0.672768 | -0.008495 |
| C  | 3.637842  | -2.208080 | -3.123095 |
| C  | 2.453239  | -2.138737 | -2.415319 |
| C  | 2.403809  | -2.419591 | -1.026374 |
| C  | 3.622346  | -2.763004 | -0.340966 |
| C  | 4.826351  | -2.796093 | -1.099684 |
| C  | 4.837562  | -2.538365 | -2.456639 |
| H  | 3.644679  | -2.007114 | -4.197638 |
| H  | 1.521714  | -1.890275 | -2.926032 |
| C  | 1.174971  | -2.407708 | -0.270670 |
| C  | 3.602240  | -3.095957 | 1.059505  |
| H  | 5.761363  | -3.049378 | -0.597413 |
| H  | 5.776257  | -2.594327 | -3.014752 |
| C  | 2.379176  | -3.154014 | 1.702965  |
| C  | 1.159990  | -2.874838 | 1.042415  |
| H  | 2.341988  | -3.452316 | 2.755345  |
| H  | 0.212487  | -3.029851 | 1.560072  |
| C  | 4.875540  | -3.419974 | 1.798940  |
| H  | 5.395215  | -4.295335 | 1.371550  |
| H  | 5.590194  | -2.579323 | 1.770353  |
| H  | 4.667102  | -3.642978 | 2.855663  |

|    |           |           |           |
|----|-----------|-----------|-----------|
| Br | -0.573115 | -2.929094 | -1.381199 |
|----|-----------|-----------|-----------|

### 3

B3LYP SCF energy: -5465.35747089 a.u.

B3LYP enthalpy: -5464.439103 a.u.

B3LYP free energy: -5464.594273 a.u.

M06-L SCF energy in solution: -5467.50296459 a.u.

M06-L enthalpy in solution: -5466.584597 a.u.

M06-L free energy in solution: -5466.739767 a.u.

### Cartesian coordinates

| ATOM | X        | Y         | Z         |
|------|----------|-----------|-----------|
| P    | 1.689021 | -0.019424 | 1.049542  |
| C    | 2.385197 | 1.472775  | 1.887790  |
| C    | 1.530722 | 2.225668  | 2.713190  |
| C    | 3.703142 | 1.914942  | 1.699876  |
| C    | 1.993904 | 3.370275  | 3.364459  |
| H    | 0.487505 | 1.926548  | 2.839233  |
| C    | 4.162399 | 3.067778  | 2.344979  |
| H    | 4.374671 | 1.370365  | 1.035415  |
| C    | 3.314016 | 3.793574  | 3.184048  |
| H    | 1.313499 | 3.943801  | 3.998512  |
| H    | 5.190341 | 3.401747  | 2.181910  |
| H    | 3.674884 | 4.695364  | 3.685197  |
| C    | 3.065919 | -0.830129 | 0.137861  |
| C    | 4.243821 | -1.246430 | 0.787328  |
| C    | 2.938461 | -1.144755 | -1.225203 |
| C    | 5.259088 | -1.908789 | 0.107126  |
| H    | 4.374371 | -1.059925 | 1.856102  |
| C    | 3.941441 | -1.815833 | -1.920293 |
| H    | 2.026083 | -0.864794 | -1.759392 |
| C    | 5.141710 | -2.209186 | -1.276535 |
| H    | 6.148878 | -2.202514 | 0.662552  |
| H    | 3.780858 | -2.031653 | -2.975643 |
| C    | 1.512462 | -1.232226 | 2.456035  |
| C    | 1.323812 | -2.587118 | 2.128162  |
| C    | 1.629539 | -0.881568 | 3.810068  |
| C    | 1.273911 | -3.564193 | 3.121760  |
| H    | 1.233720 | -2.886442 | 1.081809  |
| C    | 1.570136 | -1.862356 | 4.807419  |
| H    | 1.792065 | 0.156679  | 4.099606  |
| C    | 1.398535 | -3.204961 | 4.467976  |
| H    | 1.131954 | -4.610829 | 2.842943  |
| H    | 1.672703 | -1.568802 | 5.855582  |
| H    | 1.361257 | -3.970416 | 5.247339  |
| N    | 6.146179 | -2.861628 | -1.958619 |
| C    | 7.352765 | -3.267790 | -1.266407 |
| H    | 7.146741 | -3.983341 | -0.448644 |

|    |           |           |           |
|----|-----------|-----------|-----------|
| H  | 8.031891  | -3.758097 | -1.975399 |
| H  | 7.890699  | -2.407566 | -0.827324 |
| C  | 5.989511  | -3.161073 | -3.368390 |
| H  | 5.841104  | -2.247655 | -3.972523 |
| H  | 6.893415  | -3.662229 | -3.737260 |
| H  | 5.130389  | -3.830018 | -3.561850 |
| P  | -1.821494 | -1.267836 | -0.235922 |
| C  | -1.841464 | -2.474688 | -1.635487 |
| C  | -0.652945 | -3.167561 | -1.925318 |
| C  | -2.969947 | -2.703718 | -2.435403 |
| C  | -0.603080 | -4.090895 | -2.971409 |
| H  | 0.248741  | -2.975504 | -1.337372 |
| C  | -2.915799 | -3.620978 | -3.490155 |
| H  | -3.894056 | -2.156061 | -2.243482 |
| C  | -1.736869 | -4.320688 | -3.757890 |
| H  | 0.328820  | -4.622500 | -3.181244 |
| H  | -3.801895 | -3.783011 | -4.109536 |
| H  | -1.696993 | -5.035578 | -4.583911 |
| C  | -3.502500 | -0.507072 | -0.174040 |
| C  | -4.625683 | -1.255387 | 0.228918  |
| C  | -3.714427 | 0.846897  | -0.485424 |
| C  | -5.895459 | -0.693173 | 0.305432  |
| H  | -4.513514 | -2.307781 | 0.498700  |
| C  | -4.977352 | 1.427031  | -0.404163 |
| H  | -2.881342 | 1.462836  | -0.823909 |
| C  | -6.110584 | 0.674216  | -0.008291 |
| H  | -6.724097 | -1.326157 | 0.620744  |
| H  | -5.073977 | 2.480969  | -0.661598 |
| C  | -1.955525 | -2.367030 | 1.258539  |
| C  | -2.005342 | -1.740558 | 2.516934  |
| C  | -2.081488 | -3.763064 | 1.197227  |
| C  | -2.199253 | -2.486120 | 3.679423  |
| H  | -1.906366 | -0.653695 | 2.584613  |
| C  | -2.269365 | -4.512141 | 2.365646  |
| H  | -2.048960 | -4.274273 | 0.233433  |
| C  | -2.335049 | -3.877236 | 3.607285  |
| H  | -2.240487 | -1.980268 | 4.647249  |
| H  | -2.374445 | -5.598507 | 2.298328  |
| H  | -2.488291 | -4.462318 | 4.517819  |
| N  | -7.364833 | 1.243724  | 0.073079  |
| C  | -8.501799 | 0.444578  | 0.480698  |
| H  | -8.376657 | 0.026930  | 1.497152  |
| H  | -9.403949 | 1.069739  | 0.486314  |
| H  | -8.685472 | -0.403604 | -0.205037 |
| C  | -7.548831 | 2.642503  | -0.258420 |
| H  | -7.260185 | 2.865767  | -1.301969 |
| H  | -8.606855 | 2.909182  | -0.139383 |
| H  | -6.958144 | 3.308254  | 0.397697  |
| Pd | -0.007889 | 0.443240  | -0.534463 |
| C  | -1.134805 | 4.607874  | 0.931515  |
| C  | -0.640663 | 3.429204  | 0.411211  |

|    |           |          |           |
|----|-----------|----------|-----------|
| C  | 0.544383  | 3.387531 | -0.378711 |
| C  | 1.227197  | 4.632035 | -0.637306 |
| C  | 0.692918  | 5.828975 | -0.077989 |
| C  | -0.455880 | 5.823823 | 0.687098  |
| H  | -2.051403 | 4.602047 | 1.527695  |
| H  | -1.167594 | 2.489991 | 0.596145  |
| C  | 1.057648  | 2.160178 | -0.919528 |
| C  | 2.409458  | 4.641779 | -1.450431 |
| H  | 1.202434  | 6.776105 | -0.264911 |
| H  | -0.844177 | 6.759923 | 1.097898  |
| C  | 2.850121  | 3.440604 | -1.970242 |
| C  | 2.185008  | 2.215033 | -1.712777 |
| H  | 3.741670  | 3.427568 | -2.605566 |
| H  | 2.588992  | 1.312179 | -2.171950 |
| C  | 3.147419  | 5.925400 | -1.741462 |
| H  | 2.509793  | 6.659633 | -2.263339 |
| H  | 3.505562  | 6.414683 | -0.819134 |
| H  | 4.023902  | 5.736302 | -2.378801 |
| Br | -1.051164 | 0.864467 | -2.789755 |

## R2

B3LYP SCF energy: -557.15940111 a.u.

B3LYP enthalpy: -557.013600 a.u.

B3LYP free energy: -557.061434 a.u.

M06-L SCF energy in solution: -557.47275028 a.u.

M06-L enthalpy in solution: -557.326949 a.u.

M06-L free energy in solution: -557.374783 a.u.

## Cartesian coordinates

| ATOM | X         | Y         | Z         |
|------|-----------|-----------|-----------|
| N    | 2.090866  | -0.400558 | -0.000009 |
| N    | 3.095814  | 0.137420  | 0.000001  |
| C    | 0.923802  | -0.970952 | -0.000026 |
| H    | 0.964861  | -2.065967 | -0.000008 |
| Si   | -0.677820 | 0.014928  | -0.000004 |
| C    | -1.681908 | -0.428614 | -1.539411 |
| H    | -1.900813 | -1.508863 | -1.573781 |
| H    | -2.646293 | 0.107215  | -1.551244 |
| H    | -1.135175 | -0.168067 | -2.460070 |
| C    | -1.681754 | -0.428444 | 1.539555  |
| H    | -1.900816 | -1.508658 | 1.573995  |
| H    | -1.134812 | -0.167963 | 2.460106  |
| H    | -2.646054 | 0.107532  | 1.551550  |
| C    | -0.227009 | 1.848691  | -0.000117 |
| H    | 0.361222  | 2.122930  | -0.891203 |
| H    | -1.139530 | 2.467697  | -0.000082 |
| H    | 0.361356  | 2.123034  | 0.890846  |

**P**

B3LYP SCF energy: -1170.24765041 a.u.  
 B3LYP enthalpy: -1169.878489 a.u.  
 B3LYP free energy: -1169.951901 a.u.  
 M06-L SCF energy in solution: -1170.36735523  
 a.u.  
 M06-L enthalpy in solution: -1169.998194 a.u.  
 M06-L free energy in solution: -1170.071606 a.u.

## Cartesian coordinates

| ATOM | X         | Y         | Z         |
|------|-----------|-----------|-----------|
| P    | 1.078593  | -0.032449 | -1.284923 |
| C    | 1.837915  | -1.448962 | -0.357690 |
| C    | 3.124438  | -1.856149 | -0.752972 |
| C    | 1.195985  | -2.163565 | 0.664619  |
| C    | 3.760549  | -2.928981 | -0.129014 |
| H    | 3.629450  | -1.328401 | -1.559210 |
| C    | 1.827793  | -3.246309 | 1.282097  |
| H    | 0.197277  | -1.874503 | 0.977245  |
| C    | 3.111539  | -3.629561 | 0.891014  |
| H    | 4.757631  | -3.224726 | -0.445490 |
| H    | 1.314395  | -3.789788 | 2.071616  |
| H    | 3.601119  | -4.472299 | 1.372230  |
| C    | -0.669116 | -0.019570 | -0.701193 |
| C    | -1.117676 | 0.555237  | 0.498917  |
| C    | -1.640172 | -0.605854 | -1.529083 |
| C    | -2.459197 | 0.533607  | 0.865058  |
| H    | -0.407146 | 1.042413  | 1.161035  |
| C    | -2.984571 | -0.645212 | -1.175807 |
| H    | -1.339367 | -1.038018 | -2.481027 |
| C    | -3.431966 | -0.083268 | 0.042687  |
| H    | -2.749080 | 1.004116  | 1.797255  |
| H    | -3.687624 | -1.106740 | -1.859012 |
| C    | 1.796524  | 1.437045  | -0.408053 |
| C    | 1.671096  | 2.682883  | -1.047133 |
| C    | 2.473239  | 1.382146  | 0.820251  |
| C    | 2.187553  | 3.841628  | -0.467797 |
| H    | 1.167120  | 2.742423  | -2.009263 |
| C    | 3.000782  | 2.541049  | 1.395950  |
| H    | 2.592701  | 0.429988  | 1.328236  |
| C    | 2.856992  | 3.773345  | 0.756581  |
| H    | 2.077078  | 4.795865  | -0.976774 |
| H    | 3.523831  | 2.478768  | 2.347141  |
| H    | 3.268813  | 4.673620  | 1.205288  |
| N    | -4.766943 | -0.135748 | 0.417436  |
| C    | -5.216788 | 0.622573  | 1.572263  |
| H    | -5.063415 | 1.707636  | 1.457793  |
| H    | -6.282942 | 0.442775  | 1.724268  |
| H    | -4.694784 | 0.301914  | 2.482030  |

|   |           |           |           |
|---|-----------|-----------|-----------|
| C | -5.759881 | -0.600448 | -0.535880 |
| H | -5.550242 | -1.629415 | -0.852303 |
| H | -6.742105 | -0.596855 | -0.059050 |
| H | -5.813219 | 0.028377  | -1.439094 |

**4**

B3LYP SCF energy: -4852.93493255 a.u.  
 B3LYP enthalpy: -4852.238407 a.u.  
 B3LYP free energy: -4852.371642 a.u.  
 M06-L SCF energy in solution: -4854.60340194  
 a.u.  
 M06-L enthalpy in solution: -4853.906876 a.u.  
 M06-L free energy in solution: -4854.040111 a.u.

## Cartesian coordinates

| ATOM | X         | Y         | Z         |
|------|-----------|-----------|-----------|
| P    | -0.272250 | 1.491385  | 0.203222  |
| C    | -0.527516 | 2.190490  | 1.899580  |
| C    | 0.551306  | 2.221558  | 2.800422  |
| C    | -1.767109 | 2.719465  | 2.301222  |
| C    | 0.389271  | 2.770561  | 4.075344  |
| H    | 1.524837  | 1.832105  | 2.492850  |
| C    | -1.923882 | 3.264697  | 3.579082  |
| H    | -2.616884 | 2.703933  | 1.616699  |
| C    | -0.847226 | 3.289834  | 4.469899  |
| H    | 1.238410  | 2.790297  | 4.763334  |
| H    | -2.894247 | 3.669982  | 3.877782  |
| H    | -0.972096 | 3.713545  | 5.469943  |
| C    | -1.972339 | 1.121176  | -0.389204 |
| C    | -2.478530 | 1.629483  | -1.595946 |
| C    | -2.804815 | 0.255877  | 0.345123  |
| C    | -3.752372 | 1.297584  | -2.053332 |
| H    | -1.873115 | 2.305116  | -2.202371 |
| C    | -4.080319 | -0.077160 | -0.092580 |
| H    | -2.456681 | -0.171948 | 1.286946  |
| C    | -4.595591 | 0.432871  | -1.313161 |
| H    | -4.088317 | 1.724926  | -2.997319 |
| H    | -4.675393 | -0.750963 | 0.522212  |
| C    | 0.223848  | 2.936241  | -0.835885 |
| C    | 0.897892  | 2.701059  | -2.044645 |
| C    | -0.088636 | 4.255188  | -0.473512 |
| C    | 1.237964  | 3.763807  | -2.884458 |
| H    | 1.170732  | 1.681147  | -2.321530 |
| C    | 0.263032  | 5.318739  | -1.310329 |
| H    | -0.601617 | 4.459539  | 0.468050  |
| C    | 0.923264  | 5.075915  | -2.517728 |
| H    | 1.765167  | 3.566319  | -3.821226 |
| H    | 0.022025  | 6.342485  | -1.012461 |
| H    | 1.200283  | 5.909119  | -3.168863 |

|    |           |           |           |
|----|-----------|-----------|-----------|
| N  | -5.860059 | 0.100863  | -1.754981 |
| C  | -6.344860 | 0.616014  | -3.018935 |
| H  | -5.717629 | 0.295439  | -3.872069 |
| H  | -7.363732 | 0.248608  | -3.196177 |
| H  | -6.380689 | 1.720886  | -3.031261 |
| C  | -6.681475 | -0.813349 | -0.987654 |
| H  | -6.889787 | -0.432129 | 0.028781  |
| H  | -7.645105 | -0.950180 | -1.494750 |
| H  | -6.212828 | -1.809329 | -0.878998 |
| Pd | 1.341629  | -0.209705 | 0.159558  |
| C  | -0.915163 | -2.590959 | 3.482532  |
| C  | -0.359996 | -1.940390 | 2.399545  |
| C  | -0.658196 | -2.320505 | 1.057345  |
| C  | -1.576611 | -3.414940 | 0.849449  |
| C  | -2.126767 | -4.065183 | 1.992515  |
| C  | -1.807392 | -3.669094 | 3.275440  |
| H  | -0.667733 | -2.273002 | 4.498627  |
| H  | 0.325168  | -1.103182 | 2.556423  |
| C  | -0.079854 | -1.638258 | -0.067770 |
| C  | -1.918330 | -3.815218 | -0.485550 |
| H  | -2.819220 | -4.896877 | 1.850029  |
| H  | -2.245719 | -4.187152 | 4.132653  |
| C  | -1.350687 | -3.124110 | -1.539456 |
| C  | -0.447170 | -2.049810 | -1.336815 |
| H  | -1.603978 | -3.411333 | -2.565046 |
| H  | -0.046499 | -1.544164 | -2.220193 |
| C  | -2.873131 | -4.956167 | -0.738649 |
| H  | -2.510916 | -5.903274 | -0.303187 |
| H  | -3.868586 | -4.766919 | -0.300852 |
| H  | -3.010880 | -5.118657 | -1.817758 |
| Br | 3.313362  | 1.457019  | 0.465098  |
| C  | 2.977372  | -1.750322 | 0.152687  |
| N  | 2.563803  | -2.929228 | 0.635044  |
| N  | 2.166763  | -3.917327 | 0.994478  |
| Si | 3.878619  | -1.874786 | -1.567198 |
| C  | 5.700102  | -1.552220 | -1.209218 |
| H  | 6.120201  | -2.300861 | -0.517888 |
| H  | 6.292191  | -1.577377 | -2.139585 |
| H  | 5.816773  | -0.555445 | -0.754031 |
| C  | 3.603346  | -3.633691 | -2.203916 |
| H  | 4.110666  | -3.758060 | -3.175321 |
| H  | 4.009174  | -4.397708 | -1.520595 |
| H  | 2.533382  | -3.849614 | -2.359142 |
| C  | 3.231760  | -0.629983 | -2.818087 |
| H  | 2.161664  | -0.781408 | -3.027566 |
| H  | 3.376879  | 0.394350  | -2.443830 |
| H  | 3.785736  | -0.743751 | -3.765973 |
| H  | 3.588160  | -1.242832 | 0.916079  |

N<sub>2</sub>

B3LYP SCF energy: -109.439222 a.u.

B3LYP enthalpy: -109.430243 a.u.

B3LYP free energy: -109.451988 a.u.

M06-L SCF energy in solution: -109.538382 a.u.

M06-L enthalpy in solution: -109.529403 a.u.

M06-L free energy in solution: -109.551148 a.u.

Cartesian coordinates

| ATOM | X        | Y        | Z         |
|------|----------|----------|-----------|
| N    | 0.000000 | 0.000000 | 0.550198  |
| N    | 0.000000 | 0.000000 | -0.550198 |

**5-ts**

B3LYP SCF energy: -4852.90378773 a.u.

B3LYP enthalpy: -4852.209567 a.u.

B3LYP free energy: -4852.342115 a.u.

M06-L SCF energy in solution: -4854.56939371

a.u.

M06-L enthalpy in solution: -4853.875173 a.u.

M06-L free energy in solution: -4854.007721 a.u.

Imaginary frequency: -420.9980 cm<sup>-1</sup>

Cartesian coordinates

| ATOM | X         | Y         | Z         |
|------|-----------|-----------|-----------|
| P    | 0.328055  | -1.482463 | 0.222989  |
| C    | 0.587341  | -2.184221 | 1.917277  |
| C    | -0.501028 | -2.227941 | 2.806575  |
| C    | 1.829491  | -2.693294 | 2.334543  |
| C    | -0.346908 | -2.773080 | 4.084076  |
| H    | -1.475297 | -1.845794 | 2.491746  |
| C    | 1.979274  | -3.233852 | 3.615409  |
| H    | 2.686472  | -2.664920 | 1.659015  |
| C    | 0.892500  | -3.274201 | 4.493333  |
| H    | -1.202903 | -2.802574 | 4.763164  |
| H    | 2.951921  | -3.623959 | 3.926823  |
| H    | 1.011868  | -3.694471 | 5.495481  |
| C    | 2.027049  | -1.132468 | -0.385021 |
| C    | 2.547613  | -1.702102 | -1.557875 |
| C    | 2.845876  | -0.220729 | 0.306961  |
| C    | 3.822198  | -1.383887 | -2.023159 |
| H    | 1.952944  | -2.416118 | -2.130267 |
| C    | 4.122412  | 0.099365  | -0.138811 |
| H    | 2.486892  | 0.252785  | 1.222589  |
| C    | 4.650167  | -0.468977 | -1.327494 |
| H    | 4.170414  | -1.860016 | -2.938930 |
| H    | 4.707944  | 0.808856  | 0.444147  |
| C    | -0.192357 | -2.931354 | -0.799440 |
| C    | -0.894887 | -2.694511 | -1.991952 |

|    |           |           |           |
|----|-----------|-----------|-----------|
| C  | 0.117114  | -4.252656 | -0.441165 |
| C  | -1.265942 | -3.757094 | -2.819322 |
| H  | -1.164583 | -1.672811 | -2.266773 |
| C  | -0.264457 | -5.315721 | -1.265209 |
| H  | 0.653069  | -4.457831 | 0.487608  |
| C  | -0.953298 | -5.070620 | -2.456442 |
| H  | -1.814422 | -3.557798 | -3.743393 |
| H  | -0.024087 | -6.340751 | -0.970999 |
| H  | -1.253599 | -5.903377 | -3.097806 |
| N  | 5.912897  | -0.144796 | -1.782074 |
| C  | 6.432418  | -0.764381 | -2.983752 |
| H  | 5.804586  | -0.549121 | -3.867950 |
| H  | 7.438751  | -0.376978 | -3.188365 |
| H  | 6.507406  | -1.864338 | -2.891187 |
| C  | 6.739137  | 0.782283  | -1.036041 |
| H  | 6.970652  | 0.415543  | -0.018259 |
| H  | 7.690771  | 0.927371  | -1.563277 |
| H  | 6.260364  | 1.772808  | -0.930441 |
| Pd | -1.331930 | 0.254380  | 0.178424  |
| C  | 0.987911  | 2.684694  | 3.426920  |
| C  | 0.395715  | 2.033489  | 2.363919  |
| C  | 0.682118  | 2.383125  | 1.011142  |
| C  | 1.623212  | 3.451417  | 0.770113  |
| C  | 2.213082  | 4.102097  | 1.893207  |
| C  | 1.907329  | 3.733025  | 3.187579  |
| H  | 0.748663  | 2.390406  | 4.452064  |
| H  | -0.313121 | 1.220855  | 2.543010  |
| C  | 0.067131  | 1.698054  | -0.092510 |
| C  | 1.945514  | 3.827430  | -0.577095 |
| H  | 2.924952  | 4.912483  | 1.725404  |
| H  | 2.376277  | 4.250489  | 4.028828  |
| C  | 1.336894  | 3.138408  | -1.609343 |
| C  | 0.412340  | 2.089034  | -1.374373 |
| H  | 1.572827  | 3.408484  | -2.643713 |
| H  | -0.024816 | 1.586700  | -2.241961 |
| C  | 2.922694  | 4.940868  | -0.865227 |
| H  | 2.594188  | 5.902524  | -0.434675 |
| H  | 3.922474  | 4.731898  | -0.446609 |
| H  | 3.041013  | 5.085932  | -1.949119 |
| Br | -3.372305 | -1.332177 | 0.498976  |
| C  | -2.980703 | 1.457298  | 0.122284  |
| N  | -2.517826 | 3.239032  | 0.463626  |
| N  | -1.962821 | 4.149732  | 0.750865  |
| Si | -4.079812 | 1.624840  | -1.474678 |
| C  | -5.881796 | 1.304910  | -1.013547 |
| H  | -6.242153 | 2.033868  | -0.268700 |
| H  | -6.530359 | 1.383442  | -1.902595 |
| H  | -5.995493 | 0.295980  | -0.588359 |
| C  | -3.912789 | 3.383392  | -2.166271 |
| H  | -4.475341 | 3.452757  | -3.112765 |
| H  | -4.319386 | 4.148524  | -1.485356 |

|   |           |           |           |
|---|-----------|-----------|-----------|
| H | -2.863609 | 3.640067  | -2.386282 |
| C | -3.494957 | 0.426197  | -2.805578 |
| H | -2.442285 | 0.613798  | -3.072414 |
| H | -3.587248 | -0.614278 | -2.462467 |
| H | -4.104623 | 0.554967  | -3.716154 |
| H | -3.555326 | 1.436728  | 1.058741  |

## 6

B3LYP SCF energy: -4743.50506858 a.u.

B3LYP enthalpy: -4742.820821 a.u.

B3LYP free energy: -4742.949762 a.u.

M06-L SCF energy in solution: -4745.05587305 a.u.

M06-L enthalpy in solution: -4744.371625 a.u.

M06-L free energy in solution: -4744.500566 a.u.

## Cartesian coordinates

| ATOM | X         | Y         | Z         |
|------|-----------|-----------|-----------|
| P    | 0.713185  | -1.446595 | 0.200745  |
| C    | 1.000220  | -2.173755 | 1.878216  |
| C    | -0.120498 | -2.535781 | 2.646710  |
| C    | 2.283710  | -2.373666 | 2.411537  |
| C    | 0.040479  | -3.099803 | 3.914279  |
| H    | -1.126845 | -2.371472 | 2.251332  |
| C    | 2.442017  | -2.932126 | 3.684387  |
| H    | 3.164058  | -2.087157 | 1.832384  |
| C    | 1.322807  | -3.297998 | 4.437035  |
| H    | -0.840187 | -3.377278 | 4.499247  |
| H    | 3.446904  | -3.079646 | 4.088873  |
| H    | 1.448618  | -3.731769 | 5.432485  |
| C    | 2.333333  | -0.733830 | -0.275236 |
| C    | 3.201591  | -1.327144 | -1.205956 |
| C    | 2.734792  | 0.486486  | 0.300369  |
| C    | 4.418764  | -0.740368 | -1.545497 |
| H    | 2.929723  | -2.269733 | -1.685463 |
| C    | 3.951328  | 1.077361  | -0.019277 |
| H    | 2.082741  | 0.995780  | 1.013373  |
| C    | 4.833492  | 0.481367  | -0.958137 |
| H    | 5.048934  | -1.243477 | -2.277791 |
| H    | 4.206276  | 2.022740  | 0.457238  |
| C    | 0.539996  | -2.931490 | -0.889965 |
| C    | -0.135480 | -2.777078 | -2.113606 |
| C    | 1.050108  | -4.195424 | -0.550730 |
| C    | -0.283687 | -3.858760 | -2.985521 |
| H    | -0.556689 | -1.803521 | -2.378973 |
| C    | 0.894466  | -5.278458 | -1.421398 |
| H    | 1.568607  | -4.338465 | 0.399672  |
| C    | 0.230474  | -5.112531 | -2.640470 |
| H    | -0.812010 | -3.722860 | -3.932614 |

|    |           |           |           |
|----|-----------|-----------|-----------|
| H  | 1.293085  | -6.257633 | -1.143262 |
| H  | 0.107570  | -5.961412 | -3.318096 |
| N  | 6.037715  | 1.069376  | -1.287487 |
| C  | 6.902221  | 0.451089  | -2.271593 |
| H  | 6.418569  | 0.367903  | -3.263176 |
| H  | 7.809678  | 1.056565  | -2.391932 |
| H  | 7.215697  | -0.565365 | -1.970057 |
| C  | 6.416011  | 2.334166  | -0.689606 |
| H  | 6.489670  | 2.268308  | 0.411383  |
| H  | 7.399352  | 2.637722  | -1.071004 |
| H  | 5.698300  | 3.141723  | -0.926037 |
| Pd | -1.310345 | -0.133434 | 0.096192  |
| C  | -0.695911 | 3.148386  | 3.353916  |
| C  | -0.816152 | 2.273945  | 2.293287  |
| C  | -0.358771 | 2.606901  | 0.984645  |
| C  | 0.249214  | 3.902355  | 0.787691  |
| C  | 0.353269  | 4.780101  | 1.906343  |
| C  | -0.104430 | 4.418066  | 3.156920  |
| H  | -1.056999 | 2.861179  | 4.344938  |
| H  | -1.269694 | 1.290387  | 2.438093  |
| C  | -0.476491 | 1.693588  | -0.118113 |
| C  | 0.730827  | 4.275751  | -0.512084 |
| H  | 0.806872  | 5.763531  | 1.769890  |
| H  | -0.010050 | 5.112754  | 3.995986  |
| C  | 0.599892  | 3.363993  | -1.542537 |
| C  | 0.004979  | 2.090794  | -1.352873 |
| H  | 0.966393  | 3.627916  | -2.539745 |
| H  | -0.058117 | 1.419695  | -2.213402 |
| C  | 1.364053  | 5.624573  | -0.752327 |
| H  | 0.670498  | 6.452807  | -0.526482 |
| H  | 2.257890  | 5.780677  | -0.123866 |
| H  | 1.673719  | 5.729263  | -1.802629 |
| Br | -3.679271 | -1.436751 | 0.357823  |
| C  | -3.237658 | 0.541623  | 0.080873  |
| Si | -4.117988 | 1.254189  | -1.442356 |
| C  | -5.990817 | 0.988319  | -1.310879 |
| H  | -6.396798 | 1.453324  | -0.397076 |
| H  | -6.511668 | 1.436545  | -2.174261 |
| H  | -6.243931 | -0.083819 | -1.283207 |
| C  | -3.763118 | 3.111322  | -1.466304 |
| H  | -4.290970 | 3.589471  | -2.309032 |
| H  | -4.108569 | 3.595089  | -0.537825 |
| H  | -2.686675 | 3.314654  | -1.572736 |
| C  | -3.482436 | 0.429088  | -3.019621 |
| H  | -2.400233 | 0.597146  | -3.139241 |
| H  | -3.658840 | -0.658601 | -2.997012 |
| H  | -3.991690 | 0.835504  | -3.909532 |
| H  | -3.538358 | 1.014027  | 1.028283  |

### 7-ts

B3LYP SCF energy: -4743.48472720 a.u.

B3LYP enthalpy: -4742.801606 a.u.

B3LYP free energy: -4742.930215 a.u.

M06-L SCF energy in solution: -4745.03459226 a.u.

M06-L enthalpy in solution: -4744.351471 a.u.

M06-L free energy in solution: -4744.480080 a.u.

Imaginary frequency: -387.1290 cm<sup>-1</sup>

### Cartesian coordinates

| ATOM | X         | Y         | Z         |
|------|-----------|-----------|-----------|
| P    | 1.059394  | -1.365807 | 0.105036  |
| C    | 1.507523  | -2.103734 | 1.744513  |
| C    | 0.504546  | -2.787388 | 2.455927  |
| C    | 2.787717  | -1.993360 | 2.310510  |
| C    | 0.784259  | -3.364313 | 3.696917  |
| H    | -0.503899 | -2.861324 | 2.038909  |
| C    | 3.062542  | -2.565896 | 3.557288  |
| H    | 3.573831  | -1.452754 | 1.779175  |
| C    | 2.064161  | -3.254637 | 4.251162  |
| H    | -0.004844 | -3.894094 | 4.236862  |
| H    | 4.062946  | -2.469831 | 3.987816  |
| H    | 2.280444  | -3.699683 | 5.225984  |
| C    | 2.474816  | -0.268328 | -0.302979 |
| C    | 3.608664  | -0.685880 | -1.019945 |
| C    | 2.437716  | 1.069941  | 0.126974  |
| C    | 4.663356  | 0.182991  | -1.289381 |
| H    | 3.676510  | -1.712948 | -1.385702 |
| C    | 3.487187  | 1.947552  | -0.124787 |
| H    | 1.564513  | 1.439992  | 0.669111  |
| C    | 4.636513  | 1.529249  | -0.843985 |
| H    | 5.513616  | -0.194611 | -1.856216 |
| H    | 3.401244  | 2.972145  | 0.234504  |
| C    | 1.257098  | -2.782409 | -1.070987 |
| C    | 0.649893  | -2.674604 | -2.334829 |
| C    | 1.969207  | -3.951567 | -0.759148 |
| C    | 0.765392  | -3.705156 | -3.270263 |
| H    | 0.073894  | -1.778427 | -2.581538 |
| C    | 2.077949  | -4.986294 | -1.694529 |
| H    | 2.437758  | -4.060080 | 0.221237  |
| C    | 1.479548  | -4.864976 | -2.951502 |
| H    | 0.286441  | -3.606622 | -4.247873 |
| H    | 2.631597  | -5.892863 | -1.436035 |
| H    | 1.562499  | -5.676033 | -3.679685 |
| N    | 5.679375  | 2.395726  | -1.103965 |
| C    | 6.834641  | 1.939402  | -1.849082 |
| H    | 6.570680  | 1.603011  | -2.869287 |
| H    | 7.554877  | 2.761926  | -1.945063 |
| H    | 7.350161  | 1.099711  | -1.347082 |
| C    | 5.613291  | 3.769535  | -0.648982 |

|    |           |           |           |
|----|-----------|-----------|-----------|
| H  | 5.529236  | 3.841924  | 0.451201  |
| H  | 6.528163  | 4.296739  | -0.948331 |
| H  | 4.754088  | 4.314031  | -1.083180 |
| Pd | -1.158433 | -0.466753 | 0.064070  |
| C  | -1.141499 | 2.816947  | 3.426153  |
| C  | -1.273115 | 1.985678  | 2.332082  |
| C  | -1.133688 | 2.472353  | 1.000800  |
| C  | -0.826629 | 3.868926  | 0.815824  |
| C  | -0.704825 | 4.698264  | 1.968439  |
| C  | -0.859319 | 4.190229  | 3.242119  |
| H  | -1.253120 | 2.412633  | 4.435404  |
| H  | -1.477706 | 0.921816  | 2.472566  |
| C  | -1.263400 | 1.605130  | -0.144073 |
| C  | -0.634718 | 4.388246  | -0.510060 |
| H  | -0.480110 | 5.758613  | 1.841741  |
| H  | -0.759238 | 4.848179  | 4.109309  |
| C  | -0.759770 | 3.522348  | -1.582145 |
| C  | -1.088538 | 2.158705  | -1.405811 |
| H  | -0.610116 | 3.902145  | -2.597239 |
| H  | -1.193408 | 1.532917  | -2.294125 |
| C  | -0.303806 | 5.841766  | -0.737100 |
| H  | -1.091042 | 6.507436  | -0.344289 |
| H  | 0.635754  | 6.131855  | -0.236666 |
| H  | -0.190900 | 6.055147  | -1.809756 |
| Br | -3.206141 | -2.025388 | 0.602449  |
| C  | -2.981370 | 0.308335  | 0.026158  |
| Si | -4.252363 | 0.486435  | -1.398549 |
| C  | -5.920022 | -0.234782 | -0.870317 |
| H  | -6.256229 | 0.202184  | 0.084459  |
| H  | -6.684820 | -0.004413 | -1.632001 |
| H  | -5.870732 | -1.325958 | -0.742922 |
| C  | -4.546986 | 2.331811  | -1.722189 |
| H  | -5.379030 | 2.449152  | -2.437760 |
| H  | -4.831684 | 2.854009  | -0.793673 |
| H  | -3.663499 | 2.840414  | -2.133740 |
| C  | -3.636895 | -0.379551 | -2.959170 |
| H  | -2.700603 | 0.062548  | -3.334573 |
| H  | -3.454199 | -1.447030 | -2.759401 |
| H  | -4.389280 | -0.304904 | -3.762154 |
| H  | -3.353029 | 0.691991  | 0.987372  |

Cartesian coordinates

| ATOM | X         | Y         | Z         |
|------|-----------|-----------|-----------|
| P    | -1.076058 | -0.987977 | 0.054663  |
| C    | -1.838255 | -2.289540 | -1.009573 |
| C    | -0.999459 | -3.134669 | -1.753140 |
| C    | -3.229187 | -2.465201 | -1.088520 |
| C    | -1.539439 | -4.154499 | -2.540936 |
| H    | 0.080975  | -2.975936 | -1.731594 |
| C    | -3.767797 | -3.481250 | -1.882963 |
| H    | -3.896922 | -1.800502 | -0.536465 |
| C    | -2.924635 | -4.330029 | -2.606816 |
| H    | -0.875137 | -4.802204 | -3.118470 |
| H    | -4.852336 | -3.605046 | -1.941368 |
| H    | -3.348071 | -5.120633 | -3.231832 |
| C    | -2.343492 | 0.333240  | 0.223568  |
| C    | -3.331052 | 0.300046  | 1.225894  |
| C    | -2.374091 | 1.411019  | -0.680948 |
| C    | -4.303773 | 1.290240  | 1.327472  |
| H    | -3.349386 | -0.512687 | 1.954548  |
| C    | -3.342271 | 2.405171  | -0.590876 |
| H    | -1.632985 | 1.465247  | -1.482427 |
| C    | -4.338753 | 2.378737  | 0.418417  |
| H    | -5.040225 | 1.210884  | 2.126252  |
| H    | -3.315866 | 3.214051  | -1.319892 |
| C    | -1.082502 | -1.745868 | 1.745721  |
| C    | -0.664299 | -0.953724 | 2.831587  |
| C    | -1.472296 | -3.071096 | 1.988882  |
| C    | -0.641629 | -1.473857 | 4.126450  |
| H    | -0.370824 | 0.085560  | 2.661961  |
| C    | -1.443808 | -3.593368 | 3.287722  |
| H    | -1.802767 | -3.704332 | 1.163864  |
| C    | -1.029212 | -2.799347 | 4.358556  |
| H    | -0.321792 | -0.842164 | 4.959383  |
| H    | -1.750149 | -4.628652 | 3.458728  |
| H    | -1.009544 | -3.208252 | 5.372016  |
| N    | -5.296258 | 3.366707  | 0.514093  |
| C    | -6.293357 | 3.312772  | 1.563319  |
| H    | -5.841158 | 3.338210  | 2.572360  |
| H    | -6.962459 | 4.178294  | 1.476031  |
| H    | -6.915556 | 2.400619  | 1.502184  |
| C    | -5.300716 | 4.468577  | -0.428024 |
| H    | -5.429693 | 4.124744  | -1.470659 |
| H    | -6.133061 | 5.144423  | -0.193491 |
| H    | -4.365912 | 5.057570  | -0.386421 |
| Pd   | 0.975798  | -0.205261 | -0.743258 |
| C    | 2.510581  | 3.290380  | 2.998102  |
| C    | 2.528615  | 2.062157  | 2.356692  |
| C    | 2.783027  | 1.954022  | 0.969547  |
| C    | 3.051182  | 3.146781  | 0.222864  |
| C    | 3.021476  | 4.389637  | 0.907002  |

8

B3LYP SCF energy: -4743.57306458 a.u.

B3LYP enthalpy: -4742.886474 a.u.

B3LYP free energy: -4743.011381 a.u.

M06-L SCF energy in solution: -4745.13169956 a.u.

M06-L enthalpy in solution: -4744.445109 a.u.

M06-L free energy in solution: -4744.570016 a.u.

|    |          |           |           |
|----|----------|-----------|-----------|
| C  | 2.754454 | 4.465247  | 2.263765  |
| H  | 2.312977 | 3.344232  | 4.071604  |
| H  | 2.355889 | 1.155610  | 2.938364  |
| C  | 2.815763 | 0.653039  | 0.298134  |
| C  | 3.349301 | 3.076654  | -1.195786 |
| H  | 3.216220 | 5.308635  | 0.352916  |
| H  | 2.739993 | 5.437123  | 2.763749  |
| C  | 3.397760 | 1.846863  | -1.799419 |
| C  | 3.148010 | 0.638256  | -1.082996 |
| H  | 3.628382 | 1.773322  | -2.864341 |
| H  | 3.381880 | -0.304412 | -1.577426 |
| C  | 3.610870 | 4.331507  | -1.987814 |
| H  | 2.742073 | 5.011217  | -1.969907 |
| H  | 4.470223 | 4.898123  | -1.590513 |
| H  | 3.822803 | 4.090764  | -3.039001 |
| Br | 0.147041 | 0.305507  | -3.083701 |
| C  | 2.316569 | -0.580872 | 0.869645  |
| Si | 3.219511 | -2.257340 | 0.782024  |
| C  | 2.081256 | -3.626950 | 1.408646  |
| H  | 1.241083 | -3.807704 | 0.720464  |
| H  | 2.648112 | -4.568820 | 1.501917  |
| H  | 1.656443 | -3.390087 | 2.396794  |
| C  | 3.861679 | -2.753002 | -0.930521 |
| H  | 3.066459 | -2.755438 | -1.693191 |
| H  | 4.673091 | -2.096869 | -1.283417 |
| H  | 4.272714 | -3.775395 | -0.873164 |
| C  | 4.708412 | -2.127383 | 1.953332  |
| H  | 4.394247 | -1.883816 | 2.981843  |
| H  | 5.262338 | -3.081018 | 1.989545  |
| H  | 5.408700 | -1.342665 | 1.622672  |
| H  | 1.874015 | -0.469419 | 1.866926  |

### R3

B3LYP SCF energy: -441.59592593 a.u.  
 B3LYP enthalpy: -441.506240 a.u.  
 B3LYP free energy: -441.547106 a.u.  
 M06-L SCF energy in solution: -442.04479149 a.u.  
 M06-L enthalpy in solution: -441.955106 a.u.  
 M06-L free energy in solution: -441.995972 a.u.

Cartesian coordinates

| ATOM | X        | Y         | Z         |
|------|----------|-----------|-----------|
| C    | 1.701448 | 0.341919  | -0.272528 |
| H    | 1.594131 | 1.436765  | -0.246276 |
| C    | 2.843598 | -0.180869 | 0.203842  |
| H    | 3.011283 | -1.264852 | 0.224306  |
| H    | 3.639792 | 0.448876  | 0.617538  |
| C    | 0.508268 | -0.374092 | -0.792426 |

|   |           |           |           |
|---|-----------|-----------|-----------|
| H | 0.683076  | -1.465815 | -0.820381 |
| H | 0.311818  | -0.043675 | -1.832562 |
| B | -0.887891 | -0.024177 | 0.033294  |
| F | -1.982651 | -0.637303 | -0.622471 |
| F | -0.832584 | -0.489732 | 1.364298  |
| F | -1.087046 | 1.381240  | 0.042348  |

### Br

B3LYP SCF energy: -2573.92676920 a.u.  
 B3LYP enthalpy: -2573.924409 a.u.  
 B3LYP free energy: -2573.942945 a.u.  
 M06-L SCF energy in solution: -2574.14191875 a.u.  
 M06-L enthalpy in solution: -2574.139559 a.u.  
 M06-L free energy in solution: -2574.158095 a.u.

Cartesian coordinates

| ATOM | X        | Y        | Z        |
|------|----------|----------|----------|
| Br   | 0.000000 | 0.000000 | 0.000000 |

### 9

B3LYP SCF energy: -2611.17902488 a.u.  
 B3LYP enthalpy: -2610.402994 a.u.  
 B3LYP free energy: -2610.544078 a.u.  
 M06-L SCF energy in solution: -2613.00978316 a.u.  
 M06-L enthalpy in solution: -2612.233752 a.u.  
 M06-L free energy in solution: -2612.374836 a.u.

Cartesian coordinates

| ATOM | X         | Y         | Z         |
|------|-----------|-----------|-----------|
| P    | 1.087905  | 0.312276  | 0.966224  |
| C    | 1.632723  | 2.066388  | 1.113998  |
| C    | 0.845902  | 2.953751  | 1.873136  |
| C    | 2.736230  | 2.572807  | 0.409706  |
| C    | 1.172653  | 4.308457  | 1.946466  |
| H    | -0.037427 | 2.588119  | 2.402692  |
| C    | 3.051317  | 3.934536  | 0.473040  |
| H    | 3.347285  | 1.910224  | -0.205114 |
| C    | 2.276226  | 4.803379  | 1.243226  |
| H    | 0.550921  | 4.984333  | 2.538644  |
| H    | 3.902260  | 4.316817  | -0.095560 |
| H    | 2.519508  | 5.867719  | 1.282489  |
| C    | 2.413066  | -0.583489 | 0.072842  |
| C    | 3.714064  | -0.676820 | 0.604878  |
| C    | 2.163756  | -1.242161 | -1.142306 |
| C    | 4.723917  | -1.366051 | -0.054095 |



|    |           |           |           |
|----|-----------|-----------|-----------|
| H  | 3.949987  | -0.202188 | 1.560805  |
| C  | 3.162420  | -1.941858 | -1.812644 |
| H  | 1.162476  | -1.212995 | -1.575446 |
| C  | 4.480112  | -2.018506 | -1.293380 |
| H  | 5.711931  | -1.399653 | 0.403165  |
| H  | 2.908023  | -2.431983 | -2.751200 |
| C  | 1.267067  | -0.391406 | 2.673312  |
| C  | 0.954647  | -1.752350 | 2.846882  |
| C  | 1.732756  | 0.340264  | 3.776133  |
| C  | 1.098009  | -2.363235 | 4.093039  |
| H  | 0.610911  | -2.343093 | 1.993682  |
| C  | 1.870290  | -0.273486 | 5.027462  |
| H  | 1.997064  | 1.393007  | 3.666319  |
| C  | 1.552366  | -1.622716 | 5.190883  |
| H  | 0.855905  | -3.422925 | 4.208787  |
| H  | 2.233464  | 0.311457  | 5.876406  |
| H  | 1.661278  | -2.099411 | 6.168281  |
| N  | 5.477109  | -2.698021 | -1.955258 |
| C  | 6.814348  | -2.757229 | -1.397544 |
| H  | 6.830599  | -3.245666 | -0.406081 |
| H  | 7.461782  | -3.338617 | -2.065826 |
| H  | 7.264093  | -1.753802 | -1.283290 |
| C  | 5.199308  | -3.338563 | -3.226624 |
| H  | 4.852440  | -2.616671 | -3.988192 |
| H  | 6.115190  | -3.809645 | -3.604857 |
| H  | 4.428356  | -4.125669 | -3.136651 |
| Pd | -0.984690 | 0.179939  | -0.111726 |
| C  | -2.060792 | -4.991509 | -0.267922 |
| C  | -2.182043 | -3.713664 | 0.255225  |
| C  | -2.582037 | -2.619352 | -0.545835 |
| C  | -2.889577 | -2.852821 | -1.925616 |
| C  | -2.751330 | -4.170443 | -2.433231 |
| C  | -2.343259 | -5.219808 | -1.626567 |
| H  | -1.752087 | -5.818756 | 0.375885  |
| H  | -1.976595 | -3.552014 | 1.314144  |
| C  | -2.723516 | -1.271371 | 0.017544  |
| C  | -3.345564 | -1.767249 | -2.776291 |
| H  | -2.976109 | -4.364288 | -3.482590 |
| H  | -2.248919 | -6.225056 | -2.044986 |
| C  | -3.488564 | -0.518640 | -2.228096 |
| C  | -3.179501 | -0.245890 | -0.859798 |
| H  | -3.859362 | 0.301963  | -2.847820 |
| H  | -3.503644 | 0.709577  | -0.444470 |
| C  | -3.675750 | -2.013152 | -4.225778 |
| H  | -2.801565 | -2.386840 | -4.785321 |
| H  | -4.475494 | -2.763885 | -4.342872 |
| H  | -4.010734 | -1.086625 | -4.712749 |
| C  | -2.244729 | -0.872965 | 1.317616  |
| Si | -3.172846 | 0.277435  | 2.520160  |
| C  | -2.198341 | 0.331554  | 4.138291  |
| H  | -1.203826 | 0.787131  | 4.014725  |

|   |           |           |           |
|---|-----------|-----------|-----------|
| H | -2.748282 | 0.918834  | 4.892694  |
| H | -2.045938 | -0.679950 | 4.548834  |
| C | -3.443161 | 2.048330  | 1.900536  |
| H | -2.517368 | 2.508797  | 1.520451  |
| H | -4.197146 | 2.103613  | 1.098580  |
| H | -3.814704 | 2.671077  | 2.732042  |
| C | -4.870267 | -0.497822 | 2.861910  |
| H | -4.771468 | -1.517805 | 3.268529  |
| H | -5.436387 | 0.103024  | 3.593956  |
| H | -5.472689 | -0.561320 | 1.940906  |
| H | -1.734249 | -1.663665 | 1.878429  |
| C | -1.070916 | 2.232545  | -1.908605 |
| H | -2.054481 | 2.043675  | -2.355803 |
| C | -0.155013 | 1.166114  | -1.936198 |
| H | 0.897909  | 1.426528  | -1.795427 |
| H | -0.336945 | 0.377639  | -2.676484 |
| C | -0.825831 | 3.562727  | -1.496277 |
| H | 0.058075  | 3.731245  | -0.871079 |
| H | -1.705035 | 4.141012  | -1.186971 |
| B | -0.381312 | 4.403119  | -3.033399 |
| F | 0.777257  | 3.808547  | -3.497129 |
| F | -1.443191 | 4.258705  | -3.908993 |
| F | -0.185297 | 5.712981  | -2.647208 |

### 10-ts

B3LYP SCF energy: -2611.17634012 a.u.

B3LYP enthalpy: -2610.401670 a.u.

B3LYP free energy: -2610.544124 a.u.

M06-L SCF energy in solution: -2612.99210217 a.u.

M06-L enthalpy in solution: -2612.217432 a.u.

M06-L free energy in solution: -2612.359886 a.u.

Imaginary frequency: -73.2361 cm<sup>-1</sup>

### Cartesian coordinates

| ATOM | X        | Y         | Z        |
|------|----------|-----------|----------|
| P    | 0.983310 | -0.017693 | 1.115816 |
| C    | 1.752061 | 1.577168  | 1.641655 |
| C    | 1.005884 | 2.440073  | 2.466402 |
| C    | 3.007634 | 2.001699  | 1.179979 |
| C    | 1.516981 | 3.682795  | 2.843749 |
| H    | 0.012605 | 2.143002  | 2.812083 |
| C    | 3.511524 | 3.254504  | 1.548004 |
| H    | 3.595239 | 1.359626  | 0.521809 |
| C    | 2.772730 | 4.094557  | 2.383799 |
| H    | 0.925439 | 4.338793  | 3.487289 |
| H    | 4.486875 | 3.574022  | 1.172511 |
| H    | 3.167935 | 5.073025  | 2.667952 |
| C    | 2.263472 | -0.921286 | 0.161260 |

|    |           |           |           |
|----|-----------|-----------|-----------|
| C  | 3.461878  | -1.352866 | 0.761815  |
| C  | 2.062954  | -1.251070 | -1.189218 |
| C  | 4.424212  | -2.056641 | 0.047963  |
| H  | 3.652053  | -1.142337 | 1.817325  |
| C  | 3.014001  | -1.959884 | -1.917254 |
| H  | 1.136178  | -0.951923 | -1.681833 |
| C  | 4.230632  | -2.379869 | -1.322058 |
| H  | 5.332388  | -2.363753 | 0.564974  |
| H  | 2.801006  | -2.188358 | -2.960478 |
| C  | 0.916600  | -1.027819 | 2.671315  |
| C  | 0.361829  | -2.317377 | 2.579690  |
| C  | 1.414302  | -0.593308 | 3.909104  |
| C  | 0.305427  | -3.149562 | 3.698021  |
| H  | -0.022051 | -2.673780 | 1.620258  |
| C  | 1.349273  | -1.427141 | 5.032491  |
| H  | 1.858869  | 0.398553  | 4.005605  |
| C  | 0.795191  | -2.704241 | 4.931772  |
| H  | -0.124467 | -4.150615 | 3.607971  |
| H  | 1.738882  | -1.071886 | 5.990105  |
| H  | 0.745561  | -3.353489 | 5.809604  |
| N  | 5.180218  | -3.076885 | -2.036653 |
| C  | 6.407862  | -3.503386 | -1.394843 |
| H  | 6.221003  | -4.188631 | -0.547338 |
| H  | 7.033173  | -4.035804 | -2.122596 |
| H  | 6.995157  | -2.649768 | -1.009333 |
| C  | 4.948465  | -3.397280 | -3.431648 |
| H  | 4.807826  | -2.490874 | -4.048233 |
| H  | 5.815020  | -3.940421 | -3.829346 |
| H  | 4.056947  | -4.036274 | -3.570939 |
| Pd | -0.976159 | 0.327117  | -0.073039 |
| C  | -2.782184 | -4.492038 | -1.268926 |
| C  | -2.786656 | -3.318657 | -0.530282 |
| C  | -2.901139 | -2.051395 | -1.146199 |
| C  | -3.048573 | -1.992107 | -2.570624 |
| C  | -3.035173 | -3.209163 | -3.300108 |
| C  | -2.900640 | -4.434818 | -2.668656 |
| H  | -2.693075 | -5.456551 | -0.762800 |
| H  | -2.712408 | -3.375998 | 0.556330  |
| C  | -2.913642 | -0.813969 | -0.349965 |
| C  | -3.224312 | -0.718160 | -3.245378 |
| H  | -3.137697 | -3.180975 | -4.385642 |
| H  | -2.896127 | -5.355231 | -3.258347 |
| C  | -3.252823 | 0.423132  | -2.487664 |
| C  | -3.084799 | 0.409049  | -1.067703 |
| H  | -3.413990 | 1.387687  | -2.977181 |
| H  | -3.325121 | 1.321802  | -0.519817 |
| C  | -3.393906 | -0.657315 | -4.741858 |
| H  | -2.521196 | -1.075998 | -5.271770 |
| H  | -4.275813 | -1.227920 | -5.080152 |
| H  | -3.518587 | 0.381914  | -5.078157 |
| C  | -2.570568 | -0.743238 | 1.044202  |

|    |           |           |           |
|----|-----------|-----------|-----------|
| Si | -3.420416 | 0.332327  | 2.350726  |
| C  | -2.586570 | -0.007915 | 4.014980  |
| H  | -1.527676 | 0.294970  | 4.019722  |
| H  | -3.100279 | 0.542140  | 4.821322  |
| H  | -2.619581 | -1.080127 | 4.268887  |
| C  | -3.380041 | 2.201354  | 2.023513  |
| H  | -2.370235 | 2.561508  | 1.769523  |
| H  | -4.055030 | 2.495762  | 1.203301  |
| H  | -3.717402 | 2.738925  | 2.926155  |
| C  | -5.241444 | -0.192354 | 2.477566  |
| H  | -5.333473 | -1.262304 | 2.727496  |
| H  | -5.767606 | 0.382716  | 3.258815  |
| H  | -5.769744 | -0.026851 | 1.524017  |
| H  | -2.273139 | -1.698943 | 1.490702  |
| C  | -0.584064 | 2.852173  | -1.446409 |
| H  | -1.560793 | 2.934311  | -1.941671 |
| C  | 0.064239  | 1.552486  | -1.523469 |
| H  | 1.144044  | 1.607327  | -1.338185 |
| H  | -0.143157 | 1.026404  | -2.467721 |
| C  | -0.104579 | 3.983371  | -0.853735 |
| H  | 0.833725  | 3.974706  | -0.291606 |
| H  | -0.732963 | 4.872314  | -0.757210 |
| B  | 0.936470  | 4.776716  | -2.838875 |
| F  | 1.864601  | 3.832875  | -2.991599 |
| F  | -0.094371 | 4.801044  | -3.685165 |
| F  | 1.293224  | 5.920784  | -2.250762 |

## 11

B3LYP SCF energy: -2286.85361043 a.u.

B3LYP enthalpy: -2286.096746 a.u.

B3LYP free energy: -2286.226345 a.u.

M06-L SCF energy in solution: -2288.36782399 a.u.

M06-L enthalpy in solution: -2287.610960 a.u.

M06-L free energy in solution: -2287.740559 a.u.

## Cartesian coordinates

| ATOM | X         | Y         | Z         |
|------|-----------|-----------|-----------|
| P    | -1.037629 | -1.005684 | 0.018353  |
| C    | -1.662512 | -2.396563 | -1.025436 |
| C    | -0.796578 | -3.479603 | -1.262920 |
| C    | -2.933046 | -2.403109 | -1.621682 |
| C    | -1.204809 | -4.558876 | -2.048662 |
| H    | 0.210111  | -3.473356 | -0.837659 |
| C    | -3.334637 | -3.478700 | -2.421698 |
| H    | -3.613552 | -1.563967 | -1.468419 |
| C    | -2.476725 | -4.561236 | -2.631063 |
| H    | -0.520150 | -5.393252 | -2.220191 |
| H    | -4.325373 | -3.466836 | -2.883531 |

|    |           |           |           |
|----|-----------|-----------|-----------|
| H  | -2.793370 | -5.400855 | -3.255184 |
| C  | -2.363508 | 0.264795  | 0.037918  |
| C  | -3.603445 | 0.035422  | 0.664103  |
| C  | -2.157940 | 1.527595  | -0.542140 |
| C  | -4.599310 | 1.005216  | 0.691230  |
| H  | -3.799526 | -0.921707 | 1.153979  |
| C  | -3.143385 | 2.510471  | -0.521799 |
| H  | -1.197674 | 1.750660  | -1.010805 |
| C  | -4.400591 | 2.277116  | 0.090907  |
| H  | -5.537799 | 0.771114  | 1.192203  |
| H  | -2.923138 | 3.471879  | -0.983607 |
| C  | -1.157984 | -1.672963 | 1.747113  |
| C  | -0.836399 | -0.799250 | 2.802171  |
| C  | -1.557035 | -2.982505 | 2.053510  |
| C  | -0.915196 | -1.224408 | 4.128468  |
| H  | -0.528521 | 0.225793  | 2.580019  |
| C  | -1.628119 | -3.409844 | 3.385595  |
| H  | -1.818415 | -3.678720 | 1.254923  |
| C  | -1.308609 | -2.535108 | 4.425135  |
| H  | -0.666766 | -0.530592 | 4.935950  |
| H  | -1.939324 | -4.434280 | 3.606478  |
| H  | -1.365552 | -2.870232 | 5.463930  |
| N  | -5.383875 | 3.243271  | 0.112069  |
| C  | -6.650574 | 2.978953  | 0.764267  |
| H  | -6.531562 | 2.770467  | 1.843953  |
| H  | -7.302135 | 3.856248  | 0.663731  |
| H  | -7.177907 | 2.117101  | 0.315708  |
| C  | -5.143838 | 4.537311  | -0.495451 |
| H  | -4.922388 | 4.454659  | -1.575253 |
| H  | -6.038729 | 5.162868  | -0.385319 |
| H  | -4.298909 | 5.071717  | -0.022908 |
| Pd | 0.997143  | -0.181867 | -0.699187 |
| C  | 2.048159  | 3.869261  | 2.515822  |
| C  | 2.219083  | 2.566453  | 2.072932  |
| C  | 2.556978  | 2.272128  | 0.732293  |
| C  | 2.755120  | 3.361400  | -0.178824 |
| C  | 2.568042  | 4.683671  | 0.302071  |
| C  | 2.218086  | 4.937776  | 1.618086  |
| H  | 1.787841  | 4.062691  | 3.559545  |
| H  | 2.100336  | 1.745975  | 2.781417  |
| C  | 2.744997  | 0.882906  | 0.279801  |
| C  | 3.152315  | 3.115939  | -1.552997 |
| H  | 2.707555  | 5.523148  | -0.380511 |
| H  | 2.083726  | 5.968047  | 1.958179  |
| C  | 3.336330  | 1.818439  | -1.954920 |
| C  | 3.126132  | 0.704600  | -1.085585 |
| H  | 3.659212  | 1.615674  | -2.980073 |
| H  | 3.483079  | -0.271744 | -1.417052 |
| C  | 3.373690  | 4.261254  | -2.508019 |
| H  | 2.461812  | 4.868364  | -2.642956 |
| H  | 4.162724  | 4.947915  | -2.155559 |

|    |           |           |           |
|----|-----------|-----------|-----------|
| H  | 3.673601  | 3.889439  | -3.498493 |
| C  | 2.393581  | -0.275715 | 1.052674  |
| Si | 3.365087  | -1.892388 | 1.147994  |
| C  | 2.450424  | -3.058996 | 2.325404  |
| H  | 1.464817  | -3.356835 | 1.934631  |
| H  | 3.040352  | -3.976079 | 2.492199  |
| H  | 2.283075  | -2.586407 | 3.307320  |
| C  | 3.638697  | -2.794913 | -0.501328 |
| H  | 2.707073  | -2.920855 | -1.075987 |
| H  | 4.359647  | -2.269710 | -1.149201 |
| H  | 4.055213  | -3.797628 | -0.303687 |
| C  | 5.081232  | -1.538908 | 1.886090  |
| H  | 4.999963  | -1.074237 | 2.882783  |
| H  | 5.669023  | -2.466870 | 1.993288  |
| H  | 5.654186  | -0.849310 | 1.244107  |
| H  | 1.948475  | -0.056912 | 2.030053  |
| C  | 1.042567  | -0.696525 | -3.592780 |
| H  | 2.066983  | -0.340055 | -3.769501 |
| C  | 0.228290  | 0.125236  | -2.679658 |
| H  | -0.843988 | -0.098252 | -2.772803 |
| H  | 0.394935  | 1.204076  | -2.834405 |
| C  | 0.674523  | -1.835689 | -4.214394 |
| H  | -0.329387 | -2.255511 | -4.096273 |
| H  | 1.368155  | -2.380155 | -4.861546 |

### BF<sub>3</sub>

B3LYP SCF energy: -324.31363415 a.u.

B3LYP enthalpy: -324.296638 a.u.

B3LYP free energy: -324.326187 a.u.

M06-L SCF energy in solution: -324.61115257 a.u.

M06-L enthalpy in solution: -324.594156 a.u.

M06-L free energy in solution: -324.623705 a.u.

### Cartesian coordinates

| ATOM | X         | Y         | Z         |
|------|-----------|-----------|-----------|
| F    | 0.000000  | 1.313675  | -0.000016 |
| F    | -1.137676 | -0.656838 | -0.000016 |
| F    | 1.137676  | -0.656838 | -0.000016 |
| B    | 0.000000  | 0.000000  | 0.000085  |

### F<sup>-</sup>

B3LYP SCF energy: -99.68883403 a.u.

B3LYP enthalpy: -99.686474 a.u.

B3LYP free energy: -99.702993 a.u.

M06-L SCF energy in solution: -99.93940380 a.u.

M06-L enthalpy in solution: -99.937044 a.u.  
M06-L free energy in solution: -99.953563 a.u.

Cartesian coordinates

| ATOM | X        | Y        | Z        |
|------|----------|----------|----------|
| F    | 0.000000 | 0.000000 | 0.000000 |

#### BF<sub>4</sub><sup>-</sup>

B3LYP SCF energy: -424.19568766 a.u.  
B3LYP enthalpy: -424.175822 a.u.  
B3LYP free energy: -424.207666 a.u.  
M06-L SCF energy in solution: -424.65298671 a.u.  
M06-L enthalpy in solution: -424.633121 a.u.  
M06-L free energy in solution: -424.664965 a.u.

Cartesian coordinates

| ATOM | X         | Y         | Z         |
|------|-----------|-----------|-----------|
| B    | 0.000000  | 0.000000  | 0.000261  |
| F    | 0.000000  | 1.327013  | -0.469301 |
| F    | 1.149227  | -0.663507 | -0.469301 |
| F    | -1.149227 | -0.663507 | -0.469301 |
| F    | 0.000000  | 0.000000  | 1.407757  |

#### 12-ts

B3LYP SCF energy: -2286.83565573 a.u.  
B3LYP enthalpy: -2286.079694 a.u.  
B3LYP free energy: -2286.207820 a.u.  
M06-L SCF energy in solution: -2288.34864925 a.u.  
M06-L enthalpy in solution: -2287.592688 a.u.  
M06-L free energy in solution: -2287.720814 a.u.  
Imaginary frequency: -367.4103 cm<sup>-1</sup>

Cartesian coordinates

| ATOM | X        | Y         | Z        |
|------|----------|-----------|----------|
| P    | 1.356375 | -0.762382 | 0.368079 |
| C    | 1.957287 | -1.409613 | 2.001162 |
| C    | 1.196953 | -2.421279 | 2.622069 |
| C    | 3.086255 | -0.910101 | 2.673170 |
| C    | 1.573683 | -2.938342 | 3.864190 |
| H    | 0.295080 | -2.799917 | 2.128640 |
| C    | 3.452916 | -1.419651 | 3.925034 |
| H    | 3.680866 | -0.110400 | 2.224108 |
| C    | 2.703518 | -2.436848 | 4.520666 |
| H    | 0.973998 | -3.727495 | 4.326264 |
| H    | 4.330460 | -1.013459 | 4.435827 |

|    |           |           |           |
|----|-----------|-----------|-----------|
| H  | 2.992000  | -2.832835 | 5.497710  |
| C  | 2.453683  | 0.663598  | -0.030928 |
| C  | 3.822121  | 0.514068  | -0.345352 |
| C  | 1.928162  | 1.970813  | -0.079970 |
| C  | 4.625107  | 1.603927  | -0.661991 |
| H  | 4.272689  | -0.483868 | -0.353358 |
| C  | 2.721053  | 3.071103  | -0.396545 |
| H  | 0.861718  | 2.125674  | 0.116987  |
| C  | 4.099511  | 2.921572  | -0.688859 |
| H  | 5.671939  | 1.422712  | -0.895744 |
| H  | 2.249825  | 4.052632  | -0.428316 |
| C  | 1.999037  | -2.024521 | -0.837656 |
| C  | 1.881865  | -1.733956 | -2.212484 |
| C  | 2.602137  | -3.238498 | -0.457925 |
| C  | 2.365376  | -2.621567 | -3.173747 |
| H  | 1.410529  | -0.797398 | -2.528802 |
| C  | 3.076347  | -4.131741 | -1.427793 |
| H  | 2.712082  | -3.488867 | 0.601460  |
| C  | 2.963241  | -3.825467 | -2.784722 |
| H  | 2.270379  | -2.374047 | -4.233520 |
| H  | 3.542575  | -5.069222 | -1.111958 |
| H  | 3.338006  | -4.521661 | -3.538316 |
| N  | 4.890013  | 4.004337  | -0.996526 |
| C  | 6.268829  | 3.812277  | -1.388499 |
| H  | 6.365716  | 3.160024  | -2.275078 |
| H  | 6.715432  | 4.781973  | -1.639515 |
| H  | 6.875744  | 3.364298  | -0.581466 |
| C  | 4.321840  | 5.335028  | -1.015339 |
| H  | 3.832757  | 5.585567  | -0.058059 |
| H  | 5.119023  | 6.070335  | -1.179261 |
| H  | 3.568966  | 5.467017  | -1.815439 |
| Pd | -0.911498 | -0.189789 | 0.441429  |
| C  | -3.085151 | 3.230383  | -2.505503 |
| C  | -2.782602 | 1.918560  | -2.165844 |
| C  | -3.185919 | 1.354717  | -0.934246 |
| C  | -3.936667 | 2.163885  | -0.029249 |
| C  | -4.235255 | 3.495160  | -0.400291 |
| C  | -3.818557 | 4.028314  | -1.612616 |
| H  | -2.763316 | 3.633197  | -3.470334 |
| H  | -2.232107 | 1.300971  | -2.877318 |
| C  | -2.896952 | -0.058132 | -0.603076 |
| C  | -4.369725 | 1.622091  | 1.264648  |
| H  | -4.810015 | 4.124118  | 0.280356  |
| H  | -4.070360 | 5.060119  | -1.872748 |
| C  | -4.320714 | 0.208695  | 1.397730  |
| C  | -3.580178 | -0.579766 | 0.553582  |
| H  | -4.811338 | -0.249230 | 2.260008  |
| H  | -3.525427 | -1.651068 | 0.747701  |
| C  | -5.464551 | 2.336430  | 2.032754  |
| H  | -5.242613 | 3.394573  | 2.228650  |
| H  | -6.415719 | 2.298025  | 1.475368  |

|    |           |           |           |
|----|-----------|-----------|-----------|
| H  | -5.630592 | 1.851617  | 3.005845  |
| C  | -2.048822 | -0.909747 | -1.370359 |
| Si | -2.340052 | -2.761175 | -1.623173 |
| C  | -1.633409 | -3.874796 | -0.257765 |
| H  | -2.147502 | -3.723468 | 0.706265  |
| H  | -1.743727 | -4.938429 | -0.531965 |
| H  | -0.559812 | -3.673740 | -0.105895 |
| C  | -4.197706 | -3.134286 | -1.778228 |
| H  | -4.740799 | -2.989946 | -0.831945 |
| H  | -4.664835 | -2.477318 | -2.529796 |
| H  | -4.355848 | -4.178337 | -2.098987 |
| C  | -1.537243 | -3.249384 | -3.269893 |
| H  | -0.450995 | -3.065435 | -3.263037 |
| H  | -1.694306 | -4.321681 | -3.477019 |
| H  | -1.975394 | -2.679627 | -4.106923 |
| H  | -1.599534 | -0.450944 | -2.259222 |
| C  | -0.557965 | 0.861487  | 2.364601  |
| H  | -0.863624 | 0.149799  | 3.144341  |
| H  | 0.517099  | 1.070493  | 2.370707  |
| C  | -1.410942 | 1.962662  | 2.107609  |
| H  | -0.995014 | 2.763114  | 1.479640  |
| C  | -2.712688 | 2.172187  | 2.584903  |
| H  | -3.068241 | 3.203188  | 2.591753  |
| H  | -3.065076 | 1.555503  | 3.416135  |

### 13

B3LYP SCF energy: -2286.86010837 a.u.

B3LYP enthalpy: -2286.101737 a.u.

B3LYP free energy: -2286.226401 a.u.

M06-L SCF energy in solution: -2288.37069266 a.u.

M06-L enthalpy in solution: -2287.612321 a.u.

M06-L free energy in solution: -2287.736985 a.u.

### Cartesian coordinates

| ATOM | X        | Y         | Z         |
|------|----------|-----------|-----------|
| P    | 1.388944 | -0.718108 | 0.363857  |
| C    | 1.835775 | -1.310694 | 2.066270  |
| C    | 0.993303 | -2.274877 | 2.652981  |
| C    | 2.908286 | -0.811533 | 2.821640  |
| C    | 1.237466 | -2.750004 | 3.943402  |
| H    | 0.128754 | -2.647609 | 2.096928  |
| C    | 3.143191 | -1.277365 | 4.120695  |
| H    | 3.563042 | -0.045066 | 2.404512  |
| C    | 2.315254 | -2.251250 | 4.683107  |
| H    | 0.575011 | -3.503645 | 4.377263  |
| H    | 3.980270 | -0.871566 | 4.695140  |
| H    | 2.501788 | -2.614286 | 5.697114  |
| C    | 2.537659 | 0.674187  | -0.007011 |

|    |           |           |           |
|----|-----------|-----------|-----------|
| C  | 3.934733  | 0.516012  | -0.089042 |
| C  | 2.023333  | 1.951407  | -0.285690 |
| C  | 4.776760  | 1.578479  | -0.398507 |
| H  | 4.383034  | -0.466498 | 0.078700  |
| C  | 2.849823  | 3.027016  | -0.601782 |
| H  | 0.941057  | 2.103998  | -0.273883 |
| C  | 4.258011  | 2.875204  | -0.657978 |
| H  | 5.849176  | 1.393469  | -0.448127 |
| H  | 2.387706  | 3.990034  | -0.814622 |
| C  | 2.119086  | -2.039285 | -0.727435 |
| C  | 2.316777  | -1.735477 | -2.087573 |
| C  | 2.455837  | -3.325009 | -0.274457 |
| C  | 2.848439  | -2.683510 | -2.963259 |
| H  | 2.060828  | -0.741934 | -2.464779 |
| C  | 2.979277  | -4.278224 | -1.156289 |
| H  | 2.324486  | -3.590012 | 0.775961  |
| C  | 3.181409  | -3.961667 | -2.500983 |
| H  | 2.999856  | -2.423628 | -4.014260 |
| H  | 3.237053  | -5.272540 | -0.781886 |
| H  | 3.595805  | -4.705069 | -3.186689 |
| N  | 5.087191  | 3.934341  | -0.962313 |
| C  | 6.520247  | 3.736513  | -1.047344 |
| H  | 6.799751  | 3.012995  | -1.836153 |
| H  | 7.006344  | 4.691894  | -1.282467 |
| H  | 6.946047  | 3.370540  | -0.095301 |
| C  | 4.521926  | 5.235364  | -1.259693 |
| H  | 3.928748  | 5.631797  | -0.415723 |
| H  | 5.332239  | 5.947640  | -1.460583 |
| H  | 3.862708  | 5.214495  | -2.147757 |
| Pd | -0.911107 | -0.023985 | 0.351733  |
| C  | -3.547643 | 3.207558  | -2.465342 |
| C  | -3.100847 | 1.919751  | -2.171447 |
| C  | -3.338414 | 1.326291  | -0.917992 |
| C  | -4.066950 | 2.059980  | 0.055872  |
| C  | -4.516104 | 3.350089  | -0.260262 |
| C  | -4.260978 | 3.929280  | -1.505842 |
| H  | -3.349861 | 3.640473  | -3.449681 |
| H  | -2.569936 | 1.353618  | -2.938669 |
| C  | -2.908056 | -0.073590 | -0.611456 |
| C  | -4.275783 | 1.446641  | 1.441209  |
| H  | -5.075753 | 3.924417  | 0.479657  |
| H  | -4.624813 | 4.936476  | -1.725111 |
| C  | -4.433712 | -0.048171 | 1.316770  |
| C  | -3.740076 | -0.744992 | 0.402838  |
| H  | -5.039706 | -0.561656 | 2.069885  |
| H  | -3.777598 | -1.836351 | 0.406304  |
| C  | -5.493485 | 2.021349  | 2.185653  |
| H  | -5.391314 | 3.097283  | 2.392194  |
| H  | -6.419672 | 1.865827  | 1.610993  |
| H  | -5.608977 | 1.515182  | 3.157808  |
| C  | -2.017711 | -0.823419 | -1.421207 |

|    |           |           |           |
|----|-----------|-----------|-----------|
| Si | -2.138324 | -2.676233 | -1.790957 |
| C  | -1.622151 | -3.824211 | -0.371934 |
| H  | -2.155595 | -3.598078 | 0.565011  |
| H  | -1.836172 | -4.874134 | -0.635648 |
| H  | -0.541291 | -3.743040 | -0.176506 |
| C  | -3.920432 | -3.114683 | -2.294049 |
| H  | -4.645457 | -2.973056 | -1.477088 |
| H  | -4.250713 | -2.487525 | -3.138918 |
| H  | -3.980146 | -4.168681 | -2.616003 |
| C  | -1.047122 | -3.037357 | -3.294290 |
| H  | 0.015160  | -2.840923 | -3.086597 |
| H  | -1.141158 | -4.094388 | -3.595245 |
| H  | -1.346696 | -2.418036 | -4.156631 |
| H  | -1.582628 | -0.277054 | -2.267884 |
| C  | -0.502786 | 1.145235  | 2.245381  |
| H  | -0.589114 | 0.480420  | 3.111213  |
| H  | 0.487541  | 1.572652  | 2.079372  |
| C  | -1.630072 | 1.743208  | 1.710011  |
| H  | -1.481313 | 2.560055  | 0.993577  |
| C  | -2.992618 | 1.712056  | 2.342006  |
| H  | -3.138463 | 2.715060  | 2.783869  |
| H  | -3.006989 | 0.996459  | 3.180933  |

#### 14

B3LYP SCF energy: -989.28419425 a.u.

B3LYP enthalpy: -988.897687 a.u.

B3LYP free energy: -988.971418 a.u.

M06-L SCF energy in solution: -989.94386482 a.u.

M06-L enthalpy in solution: -989.557358 a.u.

M06-L free energy in solution: -989.631089 a.u.

Cartesian coordinates

| ATOM | X         | Y         | Z         |
|------|-----------|-----------|-----------|
| C    | 1.093445  | 3.663291  | -0.358394 |
| C    | 0.081112  | 2.720015  | -0.226060 |
| C    | 0.354293  | 1.358381  | 0.021116  |
| C    | 1.706056  | 0.956544  | 0.169541  |
| C    | 2.716268  | 1.924800  | 0.024375  |
| C    | 2.427236  | 3.260963  | -0.239777 |
| H    | 0.843474  | 4.710392  | -0.547102 |
| H    | -0.955751 | 3.050150  | -0.302000 |
| C    | -0.757241 | 0.369855  | 0.147050  |
| C    | 2.108536  | -0.496798 | 0.453627  |
| H    | 3.762147  | 1.627352  | 0.122961  |
| H    | 3.238241  | 3.986380  | -0.342966 |
| C    | 0.907096  | -1.333713 | 0.813329  |
| C    | -0.368188 | -0.942789 | 0.667499  |
| H    | 1.114137  | -2.335054 | 1.202825  |

|    |           |           |           |
|----|-----------|-----------|-----------|
| H  | -1.166553 | -1.639371 | 0.932152  |
| C  | 3.113895  | -0.576999 | 1.627214  |
| H  | 4.059539  | -0.064262 | 1.396598  |
| H  | 2.687674  | -0.121067 | 2.533611  |
| H  | 3.359948  | -1.626927 | 1.848802  |
| C  | -2.048573 | 0.637012  | -0.196178 |
| Si | -3.590096 | -0.448538 | -0.092403 |
| C  | -3.438595 | -2.000093 | -1.172377 |
| H  | -2.618773 | -2.659439 | -0.845817 |
| H  | -4.373484 | -2.585089 | -1.138299 |
| H  | -3.248103 | -1.729894 | -2.224106 |
| C  | -3.976208 | -0.959925 | 1.692675  |
| H  | -3.186171 | -1.589130 | 2.132535  |
| H  | -4.092377 | -0.074332 | 2.338829  |
| H  | -4.918779 | -1.532158 | 1.731649  |
| C  | -5.022947 | 0.601906  | -0.745688 |
| H  | -4.845577 | 0.910786  | -1.789529 |
| H  | -5.971629 | 0.040448  | -0.720588 |
| H  | -5.159667 | 1.516120  | -0.144208 |
| H  | -2.247119 | 1.630312  | -0.617078 |
| C  | 4.455689  | -2.958058 | -0.869576 |
| H  | 5.295537  | -2.264288 | -0.986930 |
| H  | 4.697927  | -4.023981 | -0.831367 |
| C  | 3.194550  | -2.522025 | -0.786704 |
| H  | 2.391402  | -3.261772 | -0.680743 |
| C  | 2.772389  | -1.081308 | -0.854463 |
| H  | 2.039148  | -0.955720 | -1.669862 |
| H  | 3.643278  | -0.456262 | -1.108972 |

#### 15

B3LYP SCF energy: -4737.38301884 a.u.

B3LYP enthalpy: -4736.742618 a.u.

B3LYP free energy: -4736.871490 a.u.

M06-L SCF energy in solution: -4739.16851486 a.u.

M06-L enthalpy in solution: -4738.528114 a.u.

M06-L free energy in solution: -4738.656986 a.u.

Cartesian coordinates

| ATOM | X         | Y         | Z        |
|------|-----------|-----------|----------|
| P    | 0.707830  | -1.417142 | 0.178396 |
| C    | 0.619841  | -1.928797 | 1.960792 |
| C    | -0.638457 | -2.160767 | 2.542802 |
| C    | 1.774021  | -2.090998 | 2.748828 |
| C    | -0.735176 | -2.549353 | 3.882388 |
| H    | -1.540809 | -2.055232 | 1.934296 |
| C    | 1.671735  | -2.479979 | 4.087766 |
| H    | 2.759775  | -1.902603 | 2.318857 |
| C    | 0.416194  | -2.709408 | 4.658445 |

|    |           |           |           |
|----|-----------|-----------|-----------|
| H  | -1.722102 | -2.724839 | 4.318457  |
| H  | 2.578786  | -2.599740 | 4.687080  |
| H  | 0.336226  | -3.008903 | 5.707312  |
| C  | 2.336618  | -0.549702 | 0.084907  |
| C  | 3.330350  | -0.889151 | -0.845404 |
| C  | 2.585303  | 0.561784  | 0.910312  |
| C  | 4.517989  | -0.164402 | -0.949254 |
| H  | 3.184358  | -1.737059 | -1.516756 |
| C  | 3.767004  | 1.289661  | 0.823886  |
| H  | 1.838191  | 0.879656  | 1.639904  |
| C  | 4.774309  | 0.945383  | -0.110980 |
| H  | 5.246708  | -0.473913 | -1.697752 |
| H  | 3.890803  | 2.147178  | 1.483702  |
| C  | 1.062540  | -2.983305 | -0.745905 |
| C  | 0.708761  | -3.050926 | -2.103164 |
| C  | 1.707868  | -4.080914 | -0.157342 |
| C  | 1.015701  | -4.183329 | -2.861290 |
| H  | 0.169220  | -2.218559 | -2.559846 |
| C  | 2.002193  | -5.219952 | -0.913579 |
| H  | 1.975623  | -4.056443 | 0.900675  |
| C  | 1.661792  | -5.272219 | -2.268019 |
| H  | 0.728905  | -4.221242 | -3.915504 |
| H  | 2.496255  | -6.071803 | -0.437945 |
| H  | 1.889372  | -6.164540 | -2.857962 |
| N  | 5.956601  | 1.668695  | -0.199772 |
| C  | 6.888341  | 1.386387  | -1.269237 |
| H  | 6.458798  | 1.561078  | -2.276598 |
| H  | 7.772500  | 2.029500  | -1.162313 |
| H  | 7.237450  | 0.339277  | -1.238782 |
| C  | 6.102496  | 2.897320  | 0.551913  |
| H  | 6.001585  | 2.724482  | 1.637482  |
| H  | 7.104201  | 3.313386  | 0.378103  |
| H  | 5.357464  | 3.668082  | 0.270215  |
| Pd | -1.228330 | -0.304695 | -0.645956 |
| C  | -0.584521 | 3.073990  | 2.563788  |
| C  | -0.696572 | 2.171458  | 1.525570  |
| C  | -0.131140 | 2.422659  | 0.241036  |
| C  | 0.568170  | 3.669859  | 0.041551  |
| C  | 0.660572  | 4.580277  | 1.134894  |
| C  | 0.103293  | 4.294134  | 2.365081  |
| H  | -1.035705 | 2.850613  | 3.534094  |
| H  | -1.235200 | 1.232274  | 1.671488  |
| C  | -0.241628 | 1.466178  | -0.827567 |
| C  | 1.153474  | 3.960643  | -1.235247 |
| H  | 1.183089  | 5.528940  | 0.994550  |
| H  | 0.186511  | 5.013974  | 3.184555  |
| C  | 1.026753  | 3.018394  | -2.238268 |
| C  | 0.342430  | 1.792627  | -2.040544 |
| H  | 1.466333  | 3.223165  | -3.220632 |
| H  | 0.281900  | 1.097266  | -2.883242 |
| C  | 1.886062  | 5.257144  | -1.482108 |

|    |           |           |           |
|----|-----------|-----------|-----------|
| H  | 1.238605  | 6.136871  | -1.321361 |
| H  | 2.755380  | 5.378235  | -0.811121 |
| H  | 2.257359  | 5.304248  | -2.517070 |
| Br | -2.495820 | -2.556981 | -0.540398 |
| C  | -3.366858 | 1.200837  | -0.554658 |
| H  | -2.921900 | 2.180075  | -0.342727 |
| C  | -2.963118 | 0.574721  | -1.733147 |
| H  | -2.458318 | 1.174306  | -2.496144 |
| H  | -3.518304 | -0.299803 | -2.080259 |
| C  | -4.430960 | 0.798857  | 0.328199  |
| H  | -4.240223 | 1.061255  | 1.380233  |
| H  | -4.729660 | -0.252645 | 0.220414  |
| B  | -5.793573 | 1.781054  | -0.060156 |
| F  | -6.813316 | 1.425966  | 0.826361  |
| F  | -5.436884 | 3.126114  | 0.113317  |
| F  | -6.178062 | 1.540151  | -1.381115 |

### 16-ts

B3LYP SCF energy: -4737.36817291 a.u.

B3LYP enthalpy: -4736.729369 a.u.

B3LYP free energy: -4736.859684 a.u.

M06-L SCF energy in solution: -4739.13390000 a.u.

M06-L enthalpy in solution: -4738.495096 a.u.

M06-L free energy in solution: -4738.625411 a.u.

Imaginary frequency: -24.7730 cm<sup>-1</sup>

### Cartesian coordinates

| ATOM | X         | Y         | Z         |
|------|-----------|-----------|-----------|
| P    | 1.012779  | -1.394852 | 0.132525  |
| C    | 1.280173  | -2.112796 | 1.831513  |
| C    | 0.209071  | -2.784085 | 2.449928  |
| C    | 2.499415  | -2.003295 | 2.523144  |
| C    | 0.363285  | -3.334941 | 3.725286  |
| H    | -0.742616 | -2.881658 | 1.916874  |
| C    | 2.646776  | -2.552207 | 3.801620  |
| H    | 3.341098  | -1.481514 | 2.063910  |
| C    | 1.578876  | -3.219833 | 4.407234  |
| H    | -0.480005 | -3.854156 | 4.189367  |
| H    | 3.602477  | -2.454332 | 4.325090  |
| H    | 1.692975  | -3.646221 | 5.408277  |
| C    | 2.496611  | -0.307811 | -0.063458 |
| C    | 3.522466  | -0.530121 | -0.992789 |
| C    | 2.577092  | 0.865114  | 0.708844  |
| C    | 4.583504  | 0.365568  | -1.145652 |
| H    | 3.500671  | -1.418751 | -1.626558 |
| C    | 3.632347  | 1.761031  | 0.577166  |
| H    | 1.789809  | 1.097994  | 1.428346  |
| C    | 4.673055  | 1.534865  | -0.356588 |

|    |           |           |           |
|----|-----------|-----------|-----------|
| H  | 5.343432  | 0.141642  | -1.894188 |
| H  | 3.624164  | 2.656608  | 1.196981  |
| C  | 1.430392  | -2.813641 | -0.988732 |
| C  | 0.872053  | -2.820434 | -2.277423 |
| C  | 2.289249  | -3.860091 | -0.617550 |
| C  | 1.184319  | -3.838901 | -3.181736 |
| H  | 0.171839  | -2.030756 | -2.559344 |
| C  | 2.592789  | -4.885304 | -1.519167 |
| H  | 2.721766  | -3.880472 | 0.385216  |
| C  | 2.044116  | -4.875183 | -2.804985 |
| H  | 0.737019  | -3.831283 | -4.179421 |
| H  | 3.258379  | -5.697339 | -1.212251 |
| H  | 2.278097  | -5.679115 | -3.508917 |
| N  | 5.731491  | 2.428676  | -0.490649 |
| C  | 6.676323  | 2.256298  | -1.570460 |
| H  | 6.210822  | 2.332517  | -2.574869 |
| H  | 7.456174  | 3.027167  | -1.499659 |
| H  | 7.178669  | 1.274378  | -1.517472 |
| C  | 5.679008  | 3.703226  | 0.192916  |
| H  | 5.609709  | 3.574688  | 1.287024  |
| H  | 6.600813  | 4.264588  | -0.013207 |
| H  | 4.818602  | 4.328848  | -0.119188 |
| Pd | -1.166169 | -0.423874 | -0.356597 |
| C  | -0.979939 | 3.033033  | 2.812758  |
| C  | -0.987819 | 2.125135  | 1.772008  |
| C  | -0.482355 | 2.450317  | 0.479445  |
| C  | 0.033889  | 3.784093  | 0.271626  |
| C  | 0.020956  | 4.697913  | 1.366945  |
| C  | -0.467704 | 4.335415  | 2.606752  |
| H  | -1.377686 | 2.748817  | 3.791005  |
| H  | -1.394172 | 1.120962  | 1.913205  |
| C  | -0.472062 | 1.472348  | -0.579351 |
| C  | 0.548336  | 4.152490  | -1.014822 |
| H  | 0.409077  | 5.708988  | 1.222901  |
| H  | -0.463114 | 5.058077  | 3.428739  |
| C  | 0.532659  | 3.196923  | -2.014979 |
| C  | 0.034927  | 1.887812  | -1.804397 |
| H  | 0.919646  | 3.459846  | -3.006442 |
| H  | 0.058284  | 1.191342  | -2.648200 |
| C  | 1.091369  | 5.536883  | -1.276124 |
| H  | 0.335561  | 6.323583  | -1.101715 |
| H  | 1.951155  | 5.779716  | -0.625273 |
| H  | 1.430972  | 5.631046  | -2.319182 |
| Br | -2.242605 | -2.814977 | -0.237366 |
| C  | -3.949913 | 0.321206  | 0.244528  |
| H  | -4.221578 | -0.689748 | 0.574370  |
| C  | -3.051851 | 0.377154  | -0.910149 |
| H  | -2.966388 | 1.385955  | -1.335973 |
| H  | -3.326046 | -0.357080 | -1.681758 |
| C  | -4.453009 | 1.375181  | 0.938312  |
| H  | -4.181483 | 2.404883  | 0.682947  |

|   |           |          |           |
|---|-----------|----------|-----------|
| H | -5.042265 | 1.227852 | 1.848246  |
| B | -6.638096 | 1.222352 | -0.622128 |
| F | -7.419488 | 1.030328 | 0.433904  |
| F | -6.448285 | 2.457827 | -1.062826 |
| F | -6.390334 | 0.204673 | -1.428887 |

## 17

B3LYP SCF energy: -4413.04149677 a.u.

B3LYP enthalpy: -4412.420448 a.u.

B3LYP free energy: -4412.536992 a.u.

M06-L SCF energy in solution: -4414.51077740 a.u.

M06-L enthalpy in solution: -4413.889729 a.u.

M06-L free energy in solution: -4414.006273 a.u.

## Cartesian coordinates

| ATOM | X         | Y        | Z         |
|------|-----------|----------|-----------|
| P    | 0.909315  | 0.971471 | 0.159239  |
| C    | 1.453657  | 1.335011 | 1.905754  |
| C    | 2.618614  | 0.704255 | 2.381674  |
| C    | 0.750834  | 2.194249 | 2.768651  |
| C    | 3.066251  | 0.937803 | 3.684961  |
| H    | 3.176715  | 0.035262 | 1.717503  |
| C    | 1.200529  | 2.420316 | 4.074380  |
| H    | -0.159037 | 2.688974 | 2.423834  |
| C    | 2.360168  | 1.792982 | 4.537232  |
| H    | 3.973978  | 0.438785 | 4.036039  |
| H    | 0.637830  | 3.090473 | 4.731215  |
| H    | 2.710146  | 1.967394 | 5.559064  |
| C    | -0.787342 | 1.708836 | 0.123062  |
| C    | -1.153614 | 2.813734 | -0.658281 |
| C    | -1.809624 | 1.078354 | 0.855481  |
| C    | -2.469890 | 3.278950 | -0.704720 |
| H    | -0.402134 | 3.330298 | -1.258247 |
| C    | -3.122688 | 1.535870 | 0.829287  |
| H    | -1.581978 | 0.196486 | 1.457610  |
| C    | -3.492236 | 2.657353 | 0.047383  |
| H    | -2.691317 | 4.135295 | -1.341567 |
| H    | -3.866813 | 0.991430 | 1.409119  |
| C    | 1.877937  | 2.209787 | -0.828454 |
| C    | 2.186896  | 1.894576 | -2.161481 |
| C    | 2.292425  | 3.447853 | -0.311889 |
| C    | 2.872914  | 2.808125 | -2.966848 |
| H    | 1.905281  | 0.915511 | -2.555483 |
| C    | 2.987977  | 4.357410 | -1.114645 |
| H    | 2.075134  | 3.704032 | 0.727614  |
| C    | 3.276229  | 4.041255 | -2.445983 |
| H    | 3.109748  | 2.544593 | -4.001310 |
| H    | 3.308955  | 5.315659 | -0.695627 |



|    |           |           |           |
|----|-----------|-----------|-----------|
| H  | 3.823696  | 4.751047  | -3.073107 |
| N  | -4.805736 | 3.120530  | 0.019885  |
| C  | -5.176941 | 4.146802  | -0.927212 |
| H  | -5.045887 | 3.836312  | -1.984756 |
| H  | -6.233008 | 4.413560  | -0.781303 |
| H  | -4.583165 | 5.065996  | -0.781264 |
| C  | -5.852079 | 2.326370  | 0.627627  |
| H  | -5.672797 | 2.176493  | 1.706262  |
| H  | -6.812331 | 2.850904  | 0.525431  |
| H  | -5.957972 | 1.322117  | 0.169685  |
| Pd | 1.163752  | -1.327629 | -0.626816 |
| C  | -1.845750 | -3.369398 | 2.359317  |
| C  | -1.081164 | -2.773894 | 1.374833  |
| C  | -1.647065 | -2.319660 | 0.148190  |
| C  | -3.064211 | -2.517131 | -0.056686 |
| C  | -3.822430 | -3.139431 | 0.979059  |
| C  | -3.234082 | -3.552323 | 2.158569  |
| H  | -1.376335 | -3.708357 | 3.287170  |
| H  | -0.004873 | -2.643640 | 1.507542  |
| C  | -0.828787 | -1.672585 | -0.847230 |
| C  | -3.670245 | -2.081126 | -1.280443 |
| H  | -4.895135 | -3.291676 | 0.837337  |
| H  | -3.841965 | -4.026036 | 2.935999  |
| C  | -2.858313 | -1.477319 | -2.224006 |
| C  | -1.471878 | -1.277874 | -2.014949 |
| H  | -3.303160 | -1.138697 | -3.167276 |
| H  | -0.901221 | -0.790873 | -2.811705 |
| C  | -5.146108 | -2.270207 | -1.537223 |
| H  | -5.446237 | -3.333044 | -1.501800 |
| H  | -5.772069 | -1.744504 | -0.792920 |
| H  | -5.420621 | -1.882732 | -2.530652 |
| Br | 3.781783  | -1.030206 | -0.597403 |
| C  | 2.000356  | -4.158885 | -0.320603 |
| H  | 3.021685  | -3.891906 | -0.019774 |
| C  | 1.414754  | -3.296004 | -1.362468 |
| H  | 0.484163  | -3.710242 | -1.774988 |
| H  | 2.133704  | -3.086175 | -2.169890 |
| C  | 1.408950  | -5.204991 | 0.291694  |
| H  | 0.386747  | -5.513110 | 0.044487  |
| H  | 1.921432  | -5.771623 | 1.076450  |

### 18-ts

B3LYP SCF energy: -4413.00548153 a.u.

B3LYP enthalpy: -4412.385800 a.u.

B3LYP free energy: -4412.501298 a.u.

M06-L SCF energy in solution: -4414.47905878 a.u.

M06-L enthalpy in solution: -4413.859377 a.u.

M06-L free energy in solution: -4413.974875 a.u.

Imaginary frequency: -334.3387 cm<sup>-1</sup>

### Cartesian coordinates

| ATOM | X         | Y         | Z         |
|------|-----------|-----------|-----------|
| P    | 0.837112  | 1.016343  | 0.123059  |
| C    | 1.403970  | 1.470852  | 1.838596  |
| C    | 2.645625  | 0.963738  | 2.269023  |
| C    | 0.657270  | 2.270910  | 2.720232  |
| C    | 3.125354  | 1.264999  | 3.546225  |
| H    | 3.232209  | 0.327663  | 1.595560  |
| C    | 1.138853  | 2.561719  | 4.001895  |
| H    | -0.310674 | 2.667873  | 2.407652  |
| C    | 2.375283  | 2.061826  | 4.418712  |
| H    | 4.092464  | 0.863921  | 3.862859  |
| H    | 0.541414  | 3.183263  | 4.675835  |
| H    | 2.751184  | 2.288102  | 5.421018  |
| C    | -0.895161 | 1.662953  | 0.085145  |
| C    | -1.326578 | 2.747821  | -0.693054 |
| C    | -1.880572 | 0.965714  | 0.808520  |
| C    | -2.667518 | 3.134387  | -0.738076 |
| H    | -0.606550 | 3.310552  | -1.290240 |
| C    | -3.218734 | 1.346706  | 0.784381  |
| H    | -1.601791 | 0.091494  | 1.400543  |
| C    | -3.651917 | 2.451712  | 0.012522  |
| H    | -2.938809 | 3.978865  | -1.371621 |
| H    | -3.929335 | 0.752617  | 1.357426  |
| C    | 1.740706  | 2.270751  | -0.911666 |
| C    | 2.131303  | 1.901918  | -2.208500 |
| C    | 2.047449  | 3.563859  | -0.455902 |
| C    | 2.790285  | 2.812701  | -3.039890 |
| H    | 1.934447  | 0.883330  | -2.550630 |
| C    | 2.714062  | 4.472172  | -1.283705 |
| H    | 1.768032  | 3.863745  | 0.556916  |
| C    | 3.083569  | 4.099711  | -2.580498 |
| H    | 3.092167  | 2.505895  | -4.045107 |
| H    | 2.949985  | 5.473636  | -0.911625 |
| H    | 3.609608  | 4.808535  | -3.226843 |
| N    | -4.990039 | 2.842798  | -0.008800 |
| C    | -5.420932 | 3.845712  | -0.955371 |
| H    | -5.279726 | 3.541413  | -2.013651 |
| H    | -6.488940 | 4.056065  | -0.803474 |
| H    | -4.876504 | 4.795538  | -0.813926 |
| C    | -5.989325 | 1.985205  | 0.591271  |
| H    | -5.794205 | 1.826836  | 1.665699  |
| H    | -6.976311 | 2.460898  | 0.504531  |
| H    | -6.046924 | 0.984102  | 0.117431  |
| Pd   | 1.266044  | -1.197007 | -0.503262 |
| C    | -1.889926 | -2.966197 | 2.535642  |
| C    | -1.010704 | -2.706118 | 1.496825  |
| C    | -1.456755 | -2.473818 | 0.169188  |
| C    | -2.878048 | -2.511373 | -0.091511 |

|    |           |           |           |
|----|-----------|-----------|-----------|
| C  | -3.753290 | -2.794324 | 0.999755  |
| C  | -3.277447 | -3.015204 | 2.278978  |
| H  | -1.509478 | -3.133823 | 3.547053  |
| H  | 0.061402  | -2.660993 | 1.690818  |
| C  | -0.507835 | -2.171971 | -0.894178 |
| C  | -3.377211 | -2.239354 | -1.405369 |
| H  | -4.830314 | -2.827295 | 0.819755  |
| H  | -3.978587 | -3.224099 | 3.093475  |
| C  | -2.450702 | -1.922481 | -2.393039 |
| C  | -1.067564 | -1.898278 | -2.161416 |
| H  | -2.814702 | -1.690916 | -3.401174 |
| H  | -0.398490 | -1.692512 | -3.002128 |
| C  | -4.854061 | -2.271491 | -1.709454 |
| H  | -5.310130 | -3.257553 | -1.501536 |
| H  | -5.426557 | -1.534552 | -1.114445 |
| H  | -5.036522 | -2.043536 | -2.771422 |
| Br | 3.944126  | -1.099368 | -0.600642 |
| C  | 1.723159  | -4.054630 | -0.038270 |
| H  | 2.708933  | -3.601739 | 0.120911  |
| C  | 0.901926  | -3.445292 | -1.115879 |
| H  | 0.140707  | -4.155975 | -1.456296 |
| H  | 1.511222  | -3.157572 | -1.987400 |
| C  | 1.343788  | -5.090946 | 0.731889  |
| H  | 0.362702  | -5.565851 | 0.619719  |
| H  | 1.999324  | -5.485761 | 1.514409  |

## 19

B3LYP SCF energy: -541.52880157 a.u.  
 B3LYP enthalpy: -541.279464 a.u.  
 B3LYP free energy: -541.330843 a.u.  
 M06-L SCF energy in solution: -541.97587257 a.u.  
 M06-L enthalpy in solution: -541.726535 a.u.  
 M06-L free energy in solution: -541.777914 a.u.

### Cartesian coordinates

| ATOM | X         | Y         | Z         |
|------|-----------|-----------|-----------|
| C    | 1.659495  | -2.608913 | -0.013879 |
| C    | 0.411615  | -2.019222 | 0.015063  |
| C    | 0.253142  | -0.603469 | 0.023961  |
| C    | 1.438497  | 0.213774  | -0.006424 |
| C    | 2.708276  | -0.430534 | -0.031849 |
| C    | 2.821708  | -1.805962 | -0.035158 |
| H    | 1.748398  | -3.698327 | -0.020549 |
| H    | -0.472276 | -2.658213 | 0.027565  |
| C    | -1.043785 | 0.019464  | 0.052598  |
| C    | 1.323019  | 1.646283  | -0.014774 |
| H    | 3.613895  | 0.177749  | -0.051160 |
| H    | 3.809144  | -2.274183 | -0.055927 |

|   |           |           |           |
|---|-----------|-----------|-----------|
| C | 0.058325  | 2.199220  | 0.001087  |
| C | -1.108633 | 1.398357  | 0.032357  |
| H | -0.051148 | 3.287467  | -0.011104 |
| H | -2.083089 | 1.891527  | 0.034167  |
| C | 2.546770  | 2.527592  | -0.044896 |
| H | 3.196639  | 2.357739  | 0.830163  |
| H | 3.163421  | 2.343858  | -0.940966 |
| H | 2.263131  | 3.589934  | -0.047995 |
| C | -2.305515 | -0.831948 | 0.076024  |
| H | -2.418748 | -1.350857 | -0.893252 |
| H | -2.174326 | -1.631860 | 0.827389  |
| C | -3.578067 | -0.100339 | 0.403243  |
| C | -4.646735 | -0.013651 | -0.393746 |
| H | -3.612848 | 0.377940  | 1.390704  |
| H | -5.552741 | 0.513136  | -0.081047 |
| H | -4.658124 | -0.469826 | -1.389631 |

## 20

B3LYP SCF energy: -3332.96251586 a.u.  
 B3LYP enthalpy: -3331.954291 a.u.  
 B3LYP free energy: -3332.127078 a.u.  
 M06-L SCF energy in solution: -3335.37388241 a.u.  
 M06-L enthalpy in solution: -3334.365658 a.u.  
 M06-L free energy in solution: -3334.538445 a.u.

### Cartesian coordinates

| ATOM | X         | Y         | Z         |
|------|-----------|-----------|-----------|
| P    | -1.978452 | -0.352692 | -1.056813 |
| C    | -2.598472 | 0.893900  | -2.274913 |
| C    | -1.769159 | 1.227559  | -3.360860 |
| C    | -3.826010 | 1.559826  | -2.137729 |
| C    | -2.175347 | 2.168856  | -4.308790 |
| H    | -0.786445 | 0.761357  | -3.462266 |
| C    | -4.226169 | 2.511280  | -3.081251 |
| H    | -4.470953 | 1.351688  | -1.283808 |
| C    | -3.408906 | 2.812015  | -4.173188 |
| H    | -1.514358 | 2.415027  | -5.143257 |
| H    | -5.182840 | 3.024553  | -2.954230 |
| H    | -3.723854 | 3.557046  | -4.908185 |
| C    | -3.320340 | -0.603748 | 0.177199  |
| C    | -4.614525 | -1.009379 | -0.203350 |
| C    | -3.068866 | -0.479003 | 1.552915  |
| C    | -5.614789 | -1.241207 | 0.733271  |
| H    | -4.851616 | -1.157701 | -1.259688 |
| C    | -4.055818 | -0.714299 | 2.507060  |
| H    | -2.067837 | -0.196635 | 1.890276  |
| C    | -5.368012 | -1.091567 | 2.124743  |
| H    | -6.597178 | -1.548481 | 0.376942  |

|   |           |           |           |    |           |           |           |
|---|-----------|-----------|-----------|----|-----------|-----------|-----------|
| H | -3.795883 | -0.599787 | 3.558469  | H  | 1.126838  | -4.347978 | -3.750244 |
| C | -2.137917 | -1.957662 | -1.999774 | H  | 0.898374  | -6.627180 | -0.092537 |
| C | -2.204319 | -3.152533 | -1.259089 | H  | 0.939589  | -6.550885 | -2.586896 |
| C | -2.238906 | -2.034579 | -3.398159 | N  | 7.076677  | -0.464407 | -1.674056 |
| C | -2.387965 | -4.380791 | -1.893810 | C  | 8.105471  | -1.483536 | -1.605279 |
| H | -2.137432 | -3.123315 | -0.169551 | H  | 7.837668  | -2.383330 | -2.188507 |
| C | -2.415870 | -3.268742 | -4.034499 | H  | 9.040191  | -1.085291 | -2.019627 |
| H | -2.209376 | -1.129665 | -4.005209 | H  | 8.307706  | -1.806632 | -0.567051 |
| C | -2.497510 | -4.444235 | -3.286612 | C  | 7.410517  | 0.862409  | -2.156417 |
| H | -2.444086 | -5.293361 | -1.295771 | H  | 7.278401  | 1.636105  | -1.377883 |
| H | -2.504761 | -3.302496 | -5.123685 | H  | 8.460878  | 0.880716  | -2.473273 |
| H | -2.646488 | -5.405861 | -3.784347 | H  | 6.793144  | 1.154603  | -3.025171 |
| N | -6.356439 | -1.310851 | 3.058787  | Pd | -0.033406 | 0.382394  | 0.229643  |
| C | -7.684316 | -1.709391 | 2.635577  | C  | 1.280705  | 3.655391  | -2.698801 |
| H | -7.679071 | -2.672152 | 2.091800  | C  | 0.742468  | 2.788095  | -1.770770 |
| H | -8.326862 | -1.828374 | 3.517090  | C  | -0.314219 | 3.170494  | -0.894942 |
| H | -8.154992 | -0.957038 | 1.976355  | C  | -0.826593 | 4.515000  | -1.007475 |
| C | -6.070118 | -1.145409 | 4.470538  | C  | -0.249291 | 5.384145  | -1.978316 |
| H | -5.730498 | -0.120765 | 4.707324  | C  | 0.778095  | 4.972972  | -2.802792 |
| H | -6.980226 | -1.338669 | 5.052221  | H  | 2.094230  | 3.326711  | -3.351288 |
| H | -5.289555 | -1.844372 | 4.824030  | H  | 1.121962  | 1.766613  | -1.694300 |
| P | 1.467698  | -1.633421 | 0.373164  | C  | -0.862940 | 2.264282  | 0.075870  |
| C | 1.632878  | -2.141345 | 2.143806  | C  | -1.890610 | 4.948662  | -0.148145 |
| C | 0.465449  | -2.537161 | 2.825266  | H  | -0.626578 | 6.404226  | -2.068817 |
| C | 2.835621  | -2.057176 | 2.861278  | H  | 1.204477  | 5.665543  | -3.533467 |
| C | 0.508832  | -2.870939 | 4.179979  | C  | -2.385623 | 4.048702  | 0.774843  |
| H | -0.490417 | -2.573512 | 2.295064  | C  | -1.877958 | 2.729870  | 0.890646  |
| C | 2.873673  | -2.377129 | 4.223412  | H  | -3.190805 | 4.360133  | 1.447800  |
| H | 3.748794  | -1.726874 | 2.363930  | H  | -2.313949 | 2.090589  | 1.660920  |
| C | 1.715538  | -2.790568 | 4.884076  | C  | -2.447736 | 6.347820  | -0.237223 |
| H | -0.406153 | -3.180931 | 4.691366  | H  | -1.676588 | 7.111321  | -0.037431 |
| H | 3.816481  | -2.292423 | 4.769243  | H  | -2.860134 | 6.565244  | -1.237550 |
| H | 1.748103  | -3.037171 | 5.948200  | H  | -3.255500 | 6.493680  | 0.494906  |
| C | 3.172951  | -1.275646 | -0.219594 | C  | 2.157765  | 1.766676  | 1.737206  |
| C | 4.177502  | -2.263938 | -0.220352 | H  | 2.995927  | 1.063419  | 1.667218  |
| C | 3.511992  | -0.020311 | -0.749577 | C  | 0.883241  | 1.213965  | 2.052269  |
| C | 5.458737  | -2.005594 | -0.690746 | H  | 0.155871  | 1.940483  | 2.423246  |
| H | 3.957265  | -3.267230 | 0.152652  | H  | 0.920226  | 0.296748  | 2.650345  |
| C | 4.788059  | 0.255019  | -1.233079 | C  | 2.485191  | 3.116147  | 1.637201  |
| H | 2.765014  | 0.773434  | -0.782479 | H  | 1.670787  | 3.844049  | 1.558488  |
| C | 5.807848  | -0.729409 | -1.210245 | H  | 3.403703  | 3.381376  | 1.103884  |
| H | 6.195014  | -2.807618 | -0.656540 | B  | 3.121517  | 3.428017  | 3.394915  |
| H | 4.987362  | 1.251621  | -1.623763 | F  | 3.475609  | 4.748871  | 3.321520  |
| C | 1.195905  | -3.246890 | -0.511692 | F  | 2.072226  | 3.184692  | 4.241051  |
| C | 1.202695  | -3.215065 | -1.918077 | F  | 4.189877  | 2.581757  | 3.572085  |
| C | 1.076341  | -4.486854 | 0.133351  |    |           |           |           |
| C | 1.114331  | -4.393159 | -2.658627 |    |           |           |           |
| H | 1.299862  | -2.259596 | -2.440333 |    |           |           |           |
| C | 0.980458  | -5.668616 | -0.612063 |    |           |           |           |
| H | 1.078422  | -4.543127 | 1.222918  |    |           |           |           |
| C | 1.005621  | -5.626775 | -2.006937 |    |           |           |           |

**21-ts**

B3LYP SCF energy: -3332.96399138 a.u.

B3LYP enthalpy: -3331.957036 a.u.

B3LYP free energy: -3332.127063 a.u.  
M06-L SCF energy in solution: -3335.36917250  
a.u.  
M06-L enthalpy in solution: -3334.362217 a.u.  
M06-L free energy in solution: -3334.532244 a.u.  
Imaginary frequency: -26.0356 cm<sup>-1</sup>

Cartesian coordinates

| ATOM | X         | Y         | Z         |
|------|-----------|-----------|-----------|
| P    | -1.997356 | -0.399605 | -1.022591 |
| C    | -2.744015 | 0.839781  | -2.176601 |
| C    | -2.015181 | 1.198160  | -3.325112 |
| C    | -3.971806 | 1.475196  | -1.936727 |
| C    | -2.519275 | 2.133939  | -4.230397 |
| H    | -1.032975 | 0.757080  | -3.509476 |
| C    | -4.470287 | 2.421373  | -2.837923 |
| H    | -4.541751 | 1.246490  | -1.035892 |
| C    | -3.752161 | 2.747251  | -3.990548 |
| H    | -1.934501 | 2.400178  | -5.114167 |
| H    | -5.425511 | 2.910401  | -2.629826 |
| H    | -4.143243 | 3.488290  | -4.692349 |
| C    | -3.229945 | -0.672703 | 0.316860  |
| C    | -4.538681 | -1.119814 | 0.050929  |
| C    | -2.873338 | -0.504448 | 1.664366  |
| C    | -5.454024 | -1.354414 | 1.070216  |
| H    | -4.855238 | -1.298403 | -0.979545 |
| C    | -3.773690 | -0.742492 | 2.700293  |
| H    | -1.857293 | -0.186441 | 1.912132  |
| C    | -5.100359 | -1.164780 | 2.433371  |
| H    | -6.453240 | -1.694908 | 0.801432  |
| H    | -3.433656 | -0.595240 | 3.724466  |
| C    | -2.209981 | -2.001051 | -1.963592 |
| C    | -2.183586 | -3.203834 | -1.233699 |
| C    | -2.416119 | -2.071271 | -3.350729 |
| C    | -2.372296 | -4.433212 | -1.865057 |
| H    | -2.037624 | -3.180627 | -0.151972 |
| C    | -2.599162 | -3.305550 | -3.985125 |
| H    | -2.460876 | -1.161145 | -3.948945 |
| C    | -2.582538 | -4.489641 | -3.246562 |
| H    | -2.354127 | -5.351855 | -1.273734 |
| H    | -2.769178 | -3.333469 | -5.064828 |
| H    | -2.733879 | -5.451989 | -3.742193 |
| N    | -6.005079 | -1.389032 | 3.448658  |
| C    | -7.350380 | -1.831533 | 3.140887  |
| H    | -7.360833 | -2.804896 | 2.616333  |
| H    | -7.917378 | -1.949493 | 4.073003  |
| H    | -7.893563 | -1.106468 | 2.507166  |
| C    | -5.613599 | -1.181370 | 4.828924  |
| H    | -5.289086 | -0.141693 | 5.016903  |
| H    | -6.468292 | -1.388314 | 5.485361  |
| H    | -4.785651 | -1.847812 | 5.134309  |

|    |           |           |           |
|----|-----------|-----------|-----------|
| P  | 1.483377  | -1.644948 | 0.247984  |
| C  | 1.458933  | -2.256680 | 1.994946  |
| C  | 0.247325  | -2.761906 | 2.504226  |
| C  | 2.555119  | -2.140969 | 2.864214  |
| C  | 0.145290  | -3.168366 | 3.835643  |
| H  | -0.630391 | -2.834495 | 1.857454  |
| C  | 2.447261  | -2.536341 | 4.202512  |
| H  | 3.500139  | -1.731998 | 2.503709  |
| C  | 1.247232  | -3.056086 | 4.690768  |
| H  | -0.803057 | -3.563740 | 4.208723  |
| H  | 3.309681  | -2.429789 | 4.865247  |
| H  | 1.165923  | -3.364446 | 5.736159  |
| C  | 3.247688  | -1.291833 | -0.139817 |
| C  | 4.251673  | -2.270686 | -0.009456 |
| C  | 3.632063  | -0.047043 | -0.662227 |
| C  | 5.574782  | -2.011563 | -0.345472 |
| H  | 3.999066  | -3.267374 | 0.360830  |
| C  | 4.950988  | 0.229158  | -1.011854 |
| H  | 2.880052  | 0.730901  | -0.802027 |
| C  | 5.969376  | -0.743793 | -0.852203 |
| H  | 6.307783  | -2.806922 | -0.216276 |
| H  | 5.184823  | 1.216507  | -1.407355 |
| C  | 1.269533  | -3.186500 | -0.764894 |
| C  | 1.184826  | -3.027649 | -2.159307 |
| C  | 1.292751  | -4.484689 | -0.232742 |
| C  | 1.144507  | -4.138509 | -3.001775 |
| H  | 1.162637  | -2.023140 | -2.590532 |
| C  | 1.244552  | -5.598791 | -1.079105 |
| H  | 1.360796  | -4.634621 | 0.846322  |
| C  | 1.176362  | -5.429667 | -2.463428 |
| H  | 1.081755  | -3.996236 | -4.083318 |
| H  | 1.269527  | -6.603942 | -0.649459 |
| H  | 1.144387  | -6.300574 | -3.123190 |
| N  | 7.280501  | -0.475660 | -1.178071 |
| C  | 8.297451  | -1.493660 | -1.005964 |
| H  | 8.098011  | -2.391641 | -1.619559 |
| H  | 9.271156  | -1.090874 | -1.312242 |
| H  | 8.386178  | -1.822197 | 0.046122  |
| C  | 7.651130  | 0.835352  | -1.675393 |
| H  | 7.403726  | 1.637059  | -0.956224 |
| H  | 8.733897  | 0.865275  | -1.850859 |
| H  | 7.148615  | 1.077032  | -2.630228 |
| Pd | 0.059008  | 0.375600  | 0.075306  |
| C  | 1.078107  | 3.632917  | -3.015597 |
| C  | 0.649012  | 2.778770  | -2.019871 |
| C  | -0.343235 | 3.156144  | -1.069581 |
| C  | -0.899961 | 4.482897  | -1.170023 |
| C  | -0.441004 | 5.336666  | -2.214704 |
| C  | 0.522453  | 4.929304  | -3.115659 |
| H  | 1.845830  | 3.310394  | -3.724412 |
| H  | 1.072047  | 1.773577  | -1.940259 |

|   |           |          |           |
|---|-----------|----------|-----------|
| C | -0.773003 | 2.260547 | -0.029953 |
| C | -1.883093 | 4.917317 | -0.218829 |
| H | -0.855769 | 6.342770 | -2.300305 |
| H | 0.859203  | 5.610184 | -3.902219 |
| C | -2.254042 | 4.035937 | 0.777534  |
| C | -1.706450 | 2.730588 | 0.874626  |
| H | -2.994846 | 4.350042 | 1.520094  |
| H | -2.051043 | 2.102118 | 1.698774  |
| C | -2.488071 | 6.297472 | -0.293745 |
| H | -1.723943 | 7.089055 | -0.208024 |
| H | -3.014923 | 6.465593 | -1.248989 |
| H | -3.214843 | 6.450079 | 0.517705  |
| C | 1.974402  | 2.504017 | 1.306104  |
| H | 2.860863  | 2.435748 | 0.663337  |
| C | 1.313741  | 1.251456 | 1.620152  |
| H | 0.594324  | 1.349008 | 2.445787  |
| H | 2.055701  | 0.477555 | 1.852288  |
| C | 1.682909  | 3.744588 | 1.804826  |
| H | 0.764993  | 3.905762 | 2.377485  |
| H | 2.145934  | 4.630675 | 1.363107  |
| B | 3.032775  | 3.640711 | 3.409185  |
| F | 2.772442  | 4.872453 | 3.901446  |
| F | 2.590987  | 2.604391 | 4.153990  |
| F | 4.240133  | 3.485938 | 2.818206  |

## 22

B3LYP SCF energy: -3008.63969006 a.u.  
 B3LYP enthalpy: -3007.650164 a.u.  
 B3LYP free energy: -3007.808263 a.u.  
 M06-L SCF energy in solution: -3010.74105796 a.u.  
 M06-L enthalpy in solution: -3009.751532 a.u.  
 M06-L free energy in solution: -3009.909631 a.u.

### Cartesian coordinates

| ATOM | X        | Y         | Z        |
|------|----------|-----------|----------|
| P    | 1.717267 | 0.003177  | 0.958085 |
| C    | 2.419661 | 1.555913  | 1.680319 |
| C    | 1.583185 | 2.330937  | 2.503941 |
| C    | 3.716964 | 2.019421  | 1.416392 |
| C    | 2.043434 | 3.517025  | 3.078656 |
| H    | 0.554916 | 2.012449  | 2.691913 |
| C    | 4.173734 | 3.214130  | 1.982791 |
| H    | 4.375537 | 1.455217  | 0.755155 |
| C    | 3.343581 | 3.961967  | 2.820707 |
| H    | 1.376208 | 4.104681  | 3.713990 |
| H    | 5.185717 | 3.562582  | 1.760205 |
| H    | 3.702253 | 4.895882  | 3.261088 |
| C    | 3.086468 | -0.796022 | 0.015605 |

|   |           |           |           |
|---|-----------|-----------|-----------|
| C | 4.293678  | -1.187082 | 0.625289  |
| C | 2.927254  | -1.108559 | -1.344096 |
| C | 5.301589  | -1.827086 | -0.087432 |
| H | 4.453760  | -0.995876 | 1.689189  |
| C | 3.921994  | -1.756862 | -2.073125 |
| H | 1.991625  | -0.841392 | -1.844053 |
| C | 5.148397  | -2.127437 | -1.467044 |
| H | 6.214498  | -2.102399 | 0.439333  |
| H | 3.736000  | -1.972881 | -3.124409 |
| C | 1.701071  | -1.132465 | 2.443880  |
| C | 1.444800  | -2.497161 | 2.218312  |
| C | 1.965185  | -0.714302 | 3.757663  |
| C | 1.463477  | -3.415503 | 3.267686  |
| H | 1.238850  | -2.852033 | 1.206175  |
| C | 1.978724  | -1.635476 | 4.812200  |
| H | 2.179755  | 0.333634  | 3.969100  |
| C | 1.731674  | -2.987785 | 4.572601  |
| H | 1.263467  | -4.470593 | 3.065264  |
| H | 2.194994  | -1.287620 | 5.826080  |
| H | 1.747471  | -3.706711 | 5.395885  |
| N | 6.146144  | -2.757937 | -2.181710 |
| C | 7.384925  | -3.130918 | -1.529609 |
| H | 7.225315  | -3.849849 | -0.704345 |
| H | 8.052799  | -3.604949 | -2.260187 |
| H | 7.914784  | -2.256265 | -1.109167 |
| C | 5.953634  | -3.055870 | -3.586553 |
| H | 5.772165  | -2.143853 | -4.184493 |
| H | 6.854362  | -3.541353 | -3.983358 |
| H | 5.100334  | -3.738576 | -3.757181 |
| P | -1.825098 | -1.250466 | -0.224661 |
| C | -1.855338 | -2.747147 | -1.315052 |
| C | -0.631551 | -3.404618 | -1.534174 |
| C | -3.006719 | -3.240059 | -1.946804 |
| C | -0.564570 | -4.542472 | -2.341634 |
| H | 0.283159  | -3.013114 | -1.080712 |
| C | -2.938058 | -4.374799 | -2.762559 |
| H | -3.961404 | -2.729050 | -1.815063 |
| C | -1.720560 | -5.032062 | -2.958568 |
| H | 0.395930  | -5.040590 | -2.497537 |
| H | -3.843931 | -4.742960 | -3.251536 |
| H | -1.670081 | -5.917585 | -3.597517 |
| C | -3.524897 | -0.531595 | -0.248849 |
| C | -4.641896 | -1.221828 | 0.258378  |
| C | -3.737484 | 0.778312  | -0.706577 |
| C | -5.909720 | -0.649789 | 0.283878  |
| H | -4.526525 | -2.230893 | 0.660683  |
| C | -4.996413 | 1.371701  | -0.678075 |
| H | -2.894636 | 1.352228  | -1.091555 |
| C | -6.126791 | 0.671110  | -0.188310 |
| H | -6.734395 | -1.234861 | 0.689299  |
| H | -5.092821 | 2.393491  | -1.042819 |

|    |           |           |           |
|----|-----------|-----------|-----------|
| C  | -1.877128 | -2.012909 | 1.471767  |
| C  | -1.766374 | -1.149947 | 2.575695  |
| C  | -2.106529 | -3.377735 | 1.704620  |
| C  | -1.897704 | -1.634654 | 3.877303  |
| H  | -1.579778 | -0.085015 | 2.411982  |
| C  | -2.235789 | -3.864072 | 3.010842  |
| H  | -2.194630 | -4.070016 | 0.865213  |
| C  | -2.136312 | -2.995217 | 4.099203  |
| H  | -1.806847 | -0.948756 | 4.723157  |
| H  | -2.419011 | -4.929653 | 3.174251  |
| H  | -2.237811 | -3.375767 | 5.118801  |
| N  | -7.379608 | 1.249215  | -0.162087 |
| C  | -8.508467 | 0.514848  | 0.370756  |
| H  | -8.372630 | 0.247294  | 1.435723  |
| H  | -9.413410 | 1.131142  | 0.294310  |
| H  | -8.694705 | -0.422604 | -0.184877 |
| C  | -7.559223 | 2.612009  | -0.620887 |
| H  | -7.268091 | 2.735493  | -1.679970 |
| H  | -8.617080 | 2.890352  | -0.531134 |
| H  | -6.968643 | 3.335882  | -0.028711 |
| Pd | -0.088141 | 0.431045  | -0.749742 |
| C  | -1.281983 | 4.602167  | 0.739489  |
| C  | -0.771344 | 3.437388  | 0.203005  |
| C  | 0.414715  | 3.418821  | -0.587688 |
| C  | 1.083080  | 4.676604  | -0.823323 |
| C  | 0.531550  | 5.859816  | -0.251039 |
| C  | -0.619202 | 5.830262  | 0.510904  |
| H  | -2.196844 | 4.575975  | 1.338024  |
| H  | -1.278119 | 2.484755  | 0.377155  |
| C  | 0.935148  | 2.194045  | -1.137390 |
| C  | 2.273299  | 4.711686  | -1.623811 |
| H  | 1.030588  | 6.815659  | -0.421920 |
| H  | -1.019626 | 6.755923  | 0.933860  |
| C  | 2.733067  | 3.520804  | -2.151257 |
| C  | 2.074575  | 2.286827  | -1.917376 |
| H  | 3.635928  | 3.525000  | -2.771184 |
| H  | 2.504344  | 1.394274  | -2.379148 |
| C  | 3.001943  | 6.006527  | -1.887956 |
| H  | 2.363167  | 6.745230  | -2.402392 |
| H  | 3.349086  | 6.483090  | -0.954718 |
| H  | 3.885258  | 5.835325  | -2.521113 |
| C  | -1.589042 | -0.193393 | -3.426023 |
| H  | -1.032278 | -1.119072 | -3.623850 |
| C  | -2.851997 | -0.126668 | -3.883193 |
| H  | -3.470120 | 0.765224  | -3.738802 |
| H  | -3.309192 | -0.964658 | -4.417297 |
| C  | -0.841173 | 0.867935  | -2.719246 |
| H  | -1.392603 | 1.819989  | -2.692617 |
| H  | 0.111879  | 1.047867  | -3.236219 |

## 23

B3LYP SCF energy: -3448.43218690 a.u.

B3LYP enthalpy: -3447.367476 a.u.

B3LYP free energy: -3447.540238 a.u.

M06-L SCF energy in solution: -3450.78388257 a.u.

M06-L enthalpy in solution: -3449.719172 a.u.

M06-L free energy in solution: -3449.891934 a.u.

### Cartesian coordinates

| ATOM | X         | Y         | Z         |
|------|-----------|-----------|-----------|
| P    | -1.784588 | -0.332314 | -1.162860 |
| C    | -2.463874 | 0.970363  | -2.279064 |
| C    | -1.658773 | 1.458313  | -3.324395 |
| C    | -3.742446 | 1.520756  | -2.097622 |
| C    | -2.137430 | 2.440942  | -4.193101 |
| H    | -0.643526 | 1.080037  | -3.461807 |
| C    | -4.215202 | 2.511652  | -2.963389 |
| H    | -4.373112 | 1.188005  | -1.273047 |
| C    | -3.420141 | 2.967743  | -4.017321 |
| H    | -1.499322 | 2.805397  | -5.001487 |
| H    | -5.212994 | 2.929156  | -2.807979 |
| H    | -3.793994 | 3.739383  | -4.694582 |
| C    | -3.137748 | -0.869693 | -0.052708 |
| C    | -4.361351 | -1.331423 | -0.581058 |
| C    | -2.977245 | -0.938663 | 1.340072  |
| C    | -5.380985 | -1.796182 | 0.237124  |
| H    | -4.524384 | -1.336814 | -1.661320 |
| C    | -3.984157 | -1.409770 | 2.177343  |
| H    | -2.032917 | -0.624667 | 1.789746  |
| C    | -5.229971 | -1.844257 | 1.651636  |
| H    | -6.304884 | -2.134083 | -0.229893 |
| H    | -3.795948 | -1.435195 | 3.249552  |
| C    | -1.659621 | -1.831476 | -2.261372 |
| C    | -1.641802 | -3.095036 | -1.641801 |
| C    | -1.681019 | -1.774656 | -3.664323 |
| C    | -1.661845 | -4.264776 | -2.400529 |
| H    | -1.646368 | -3.171583 | -0.552810 |
| C    | -1.694974 | -2.949827 | -4.423904 |
| H    | -1.722941 | -0.817636 | -4.182305 |
| C    | -1.690301 | -4.196581 | -3.796831 |
| H    | -1.658185 | -5.234342 | -1.897632 |
| H    | -1.726876 | -2.882554 | -5.514256 |
| H    | -1.713978 | -5.112668 | -4.391952 |
| N    | -6.237627 | -2.296817 | 2.464412  |
| C    | -7.495713 | -2.743614 | 1.890646  |
| H    | -7.360220 | -3.604957 | 1.212257  |
| H    | -8.171650 | -3.055802 | 2.695890  |
| H    | -7.998395 | -1.941333 | 1.321777  |
| C    | -6.050353 | -2.339492 | 3.903576  |

|    |           |           |           |
|----|-----------|-----------|-----------|
| H  | -5.835247 | -1.340047 | 4.322109  |
| H  | -6.966375 | -2.710450 | 4.379059  |
| H  | -5.223594 | -3.012277 | 4.195792  |
| P  | 1.654265  | -1.546360 | 0.224739  |
| C  | 1.571835  | -2.283458 | 1.921391  |
| C  | 0.343675  | -2.830679 | 2.341563  |
| C  | 2.645486  | -2.267444 | 2.827507  |
| C  | 0.202040  | -3.370447 | 3.621489  |
| H  | -0.513750 | -2.835361 | 1.664049  |
| C  | 2.497252  | -2.797663 | 4.114886  |
| H  | 3.606760  | -1.843801 | 2.531655  |
| C  | 1.280004  | -3.354481 | 4.513510  |
| H  | -0.756432 | -3.798607 | 3.924789  |
| H  | 3.343357  | -2.778268 | 4.806307  |
| H  | 1.168955  | -3.771991 | 5.517094  |
| C  | 3.379250  | -0.970451 | -0.016941 |
| C  | 4.472660  | -1.861439 | 0.035716  |
| C  | 3.653864  | 0.355154  | -0.392664 |
| C  | 5.768390  | -1.446514 | -0.233905 |
| H  | 4.309569  | -2.913949 | 0.280036  |
| C  | 4.945925  | 0.787936  | -0.678492 |
| H  | 2.835790  | 1.073950  | -0.476257 |
| C  | 6.051607  | -0.099758 | -0.599152 |
| H  | 6.570354  | -2.180833 | -0.175688 |
| H  | 5.091927  | 1.825242  | -0.975697 |
| C  | 1.651808  | -3.011823 | -0.904295 |
| C  | 1.747239  | -2.757852 | -2.283976 |
| C  | 1.676986  | -4.339475 | -0.451602 |
| C  | 1.883299  | -3.809169 | -3.189766 |
| H  | 1.729826  | -1.728995 | -2.653400 |
| C  | 1.808775  | -5.392798 | -1.364236 |
| H  | 1.609824  | -4.561891 | 0.614597  |
| C  | 1.917827  | -5.131057 | -2.731355 |
| H  | 1.962416  | -3.596842 | -4.258454 |
| H  | 1.836445  | -6.422431 | -0.998563 |
| H  | 2.029504  | -5.954687 | -3.440768 |
| N  | 7.330045  | 0.314894  | -0.870235 |
| C  | 8.435499  | -0.626236 | -0.802129 |
| H  | 8.318967  | -1.457254 | -1.520726 |
| H  | 9.370563  | -0.105608 | -1.041442 |
| H  | 8.543664  | -1.063541 | 0.206212  |
| C  | 7.583207  | 1.690556  | -1.260805 |
| H  | 7.260527  | 2.405772  | -0.483251 |
| H  | 8.659312  | 1.832255  | -1.417666 |
| H  | 7.067171  | 1.958285  | -2.200662 |
| Pd | 0.040630  | 0.404472  | 0.206045  |
| C  | 0.915110  | 4.134138  | -2.305526 |
| C  | 0.499184  | 3.097210  | -1.495453 |
| C  | -0.583787 | 3.239384  | -0.580331 |
| C  | -1.257389 | 4.514092  | -0.523662 |
| C  | -0.800581 | 5.562449  | -1.374069 |

|    |           |          |           |
|----|-----------|----------|-----------|
| C  | 0.257649  | 5.384268 | -2.241654 |
| H  | 1.748771  | 3.990334 | -2.997699 |
| H  | 1.001424  | 2.127679 | -1.554206 |
| C  | -1.016113 | 2.164475 | 0.268806  |
| C  | -2.361108 | 4.701575 | 0.377292  |
| H  | -1.300403 | 6.531542 | -1.338188 |
| H  | 0.585955  | 6.207652 | -2.880736 |
| C  | -2.737778 | 3.639626 | 1.176285  |
| C  | -2.075697 | 2.385109 | 1.125399  |
| H  | -3.574168 | 3.761511 | 1.870813  |
| H  | -2.443040 | 1.595943 | 1.783509  |
| C  | -3.093731 | 6.017842 | 0.451594  |
| H  | -2.423054 | 6.847097 | 0.732443  |
| H  | -3.547593 | 6.288330 | -0.516530 |
| H  | -3.900042 | 5.975509 | 1.197468  |
| N  | 0.336023  | 0.777733 | 3.012862  |
| N  | -0.454638 | 0.531237 | 3.773988  |
| C  | 1.219462  | 1.167060 | 2.077317  |
| Si | 1.922406  | 2.947746 | 2.554428  |
| C  | 0.519990  | 4.095399 | 3.037695  |
| H  | -0.107806 | 3.672644 | 3.838455  |
| H  | 0.954299  | 5.032573 | 3.425251  |
| H  | -0.130559 | 4.345473 | 2.188200  |
| C  | 3.011858  | 2.601424 | 4.059412  |
| H  | 2.441898  | 2.162055 | 4.894629  |
| H  | 3.841871  | 1.918361 | 3.815435  |
| H  | 3.454585  | 3.543167 | 4.426040  |
| C  | 2.977394  | 3.627355 | 1.161569  |
| H  | 2.410672  | 3.776618 | 0.231779  |
| H  | 3.368603  | 4.608358 | 1.480922  |
| H  | 3.839459  | 2.974944 | 0.957451  |
| H  | 2.058020  | 0.456009 | 2.103896  |

#### 24-ts

B3LYP SCF energy: -3448.39705991 a.u.

B3LYP enthalpy: -3447.334972 a.u.

B3LYP free energy: -3447.508503 a.u.

M06-L SCF energy in solution: -3450.74812603 a.u.

M06-L enthalpy in solution: -3449.686038 a.u.

M06-L free energy in solution: -3449.859569 a.u.

Imaginary frequency: -285.1519 cm<sup>-1</sup>

#### Cartesian coordinates

| ATOM | X         | Y         | Z         |
|------|-----------|-----------|-----------|
| P    | -1.788337 | -0.375578 | -1.175871 |
| C    | -2.473963 | 0.948487  | -2.263299 |
| C    | -1.663537 | 1.458467  | -3.294067 |
| C    | -3.755537 | 1.490855  | -2.081323 |

|   |           |           |           |    |           |           |           |
|---|-----------|-----------|-----------|----|-----------|-----------|-----------|
| C | -2.139672 | 2.454283  | -4.149011 | C  | 4.530676  | -1.829563 | 0.079125  |
| H | -0.646350 | 1.084252  | -3.432221 | C  | 3.727426  | 0.385013  | -0.386235 |
| C | -4.226138 | 2.495538  | -2.932688 | C  | 5.832998  | -1.419949 | -0.166007 |
| H | -4.391169 | 1.140308  | -1.267908 | H  | 4.360069  | -2.879187 | 0.330821  |
| C | -3.425881 | 2.972839  | -3.973099 | C  | 5.026578  | 0.813031  | -0.646203 |
| H | -1.497559 | 2.835382  | -4.946484 | H  | 2.911798  | 1.102958  | -0.501853 |
| H | -5.226800 | 2.906264  | -2.777303 | C  | 6.127720  | -0.077116 | -0.536882 |
| H | -3.798175 | 3.754631  | -4.639504 | H  | 6.631665  | -2.155493 | -0.083395 |
| C | -3.135479 | -0.923575 | -0.061133 | H  | 5.181570  | 1.846986  | -0.950336 |
| C | -4.368284 | -1.379160 | -0.572018 | C  | 1.700598  | -2.941095 | -0.963639 |
| C | -2.952104 | -1.004273 | 1.327837  | C  | 1.759089  | -2.647201 | -2.337470 |
| C | -5.374614 | -1.849400 | 0.259844  | C  | 1.757484  | -4.280585 | -0.549622 |
| H | -4.548582 | -1.376356 | -1.649574 | C  | 1.889799  | -3.670314 | -3.275877 |
| C | -3.944780 | -1.481165 | 2.179297  | H  | 1.716222  | -1.608970 | -2.677849 |
| H | -1.997113 | -0.696076 | 1.758199  | C  | 1.882727  | -5.305380 | -1.494712 |
| C | -5.199911 | -1.909059 | 1.671064  | H  | 1.719588  | -4.534361 | 0.511092  |
| H | -6.306613 | -2.183280 | -0.193821 | C  | 1.954565  | -5.003644 | -2.856133 |
| H | -3.739377 | -1.518063 | 3.248142  | H  | 1.938714  | -3.426833 | -4.339665 |
| C | -1.691592 | -1.856478 | -2.304721 | H  | 1.934084  | -6.344378 | -1.159341 |
| C | -1.628420 | -3.129779 | -1.709101 | H  | 2.059879  | -5.805289 | -3.591185 |
| C | -1.761334 | -1.776199 | -3.704559 | N  | 7.412395  | 0.331234  | -0.786569 |
| C | -1.646227 | -4.286687 | -2.487501 | C  | 8.512546  | -0.614367 | -0.696504 |
| H | -1.597632 | -3.225257 | -0.621802 | H  | 8.401720  | -1.450076 | -1.410518 |
| C | -1.774033 | -2.938304 | -4.484674 | H  | 9.453045  | -0.099720 | -0.927275 |
| H | -1.839451 | -0.810480 | -4.202606 | H  | 8.605378  | -1.044631 | 0.316401  |
| C | -1.720546 | -4.195288 | -3.881054 | C  | 7.677466  | 1.703295  | -1.182264 |
| H | -1.605760 | -5.264526 | -2.002347 | H  | 7.339326  | 2.424971  | -0.417481 |
| H | -1.842901 | -2.852931 | -5.572099 | H  | 8.757127  | 1.841390  | -1.316120 |
| H | -1.742632 | -5.101271 | -4.491564 | H  | 7.182935  | 1.964887  | -2.135385 |
| N | -6.194909 | -2.367124 | 2.497293  | Pd | 0.092066  | 0.437462  | 0.246977  |
| C | -7.462514 | -2.808641 | 1.940885  | C  | 0.856571  | 4.206218  | -2.261367 |
| H | -7.339714 | -3.666887 | 1.256038  | C  | 0.483522  | 3.164297  | -1.436996 |
| H | -8.126762 | -3.123080 | 2.754988  | C  | -0.616577 | 3.265893  | -0.536452 |
| H | -7.972036 | -2.002414 | 1.383900  | C  | -1.357267 | 4.504592  | -0.515894 |
| C | -5.981491 | -2.427615 | 3.931742  | C  | -0.945303 | 5.558591  | -1.382141 |
| H | -5.756495 | -1.433748 | 4.358617  | C  | 0.133282  | 5.420810  | -2.231627 |
| H | -6.889561 | -2.802049 | 4.419652  | H  | 1.706250  | 4.093122  | -2.939687 |
| H | -5.151190 | -3.105798 | 4.201235  | H  | 1.036266  | 2.221700  | -1.471473 |
| P | 1.711564  | -1.508071 | 0.203246  | C  | -1.003092 | 2.184820  | 0.326947  |
| C | 1.602539  | -2.274317 | 1.883201  | C  | -2.481017 | 4.652576  | 0.366890  |
| C | 0.384885  | -2.876411 | 2.256363  | H  | -1.497013 | 6.499711  | -1.373127 |
| C | 2.640274  | -2.213736 | 2.828043  | H  | 0.426500  | 6.247776  | -2.883029 |
| C | 0.219657  | -3.423912 | 3.529936  | C  | -2.811767 | 3.588246  | 1.182635  |
| H | -0.444964 | -2.919148 | 1.546642  | C  | -2.080419 | 2.372299  | 1.169530  |
| C | 2.468099  | -2.753132 | 4.108991  | H  | -3.663450 | 3.679537  | 1.863305  |
| H | 3.592892  | -1.749395 | 2.567094  | H  | -2.412938 | 1.580895  | 1.843591  |
| C | 1.262329  | -3.362638 | 4.461982  | C  | -3.282288 | 5.929887  | 0.405726  |
| H | -0.728905 | -3.896633 | 3.796298  | H  | -2.660336 | 6.798710  | 0.679056  |
| H | 3.287183  | -2.699949 | 4.830516  | H  | -3.736283 | 6.157945  | -0.573267 |
| H | 1.132970  | -3.788556 | 5.459868  | H  | -4.095744 | 5.859146  | 1.141718  |
| C | 3.441265  | -0.936587 | -0.005146 | N  | 0.116249  | 0.715842  | 3.314089  |



|    |           |          |          |
|----|-----------|----------|----------|
| N  | -0.665691 | 0.443084 | 4.041970 |
| C  | 1.266443  | 1.199578 | 1.753695 |
| Si | 1.883125  | 2.916469 | 2.469355 |
| C  | 0.502314  | 4.101421 | 2.932584 |
| H  | -0.183563 | 3.673632 | 3.680084 |
| H  | 0.960653  | 4.998521 | 3.382845 |
| H  | -0.092767 | 4.419801 | 2.065849 |
| C  | 2.899787  | 2.503764 | 4.010308 |
| H  | 2.288490  | 2.063292 | 4.814904 |
| H  | 3.720554  | 1.803473 | 3.784069 |
| H  | 3.353176  | 3.424351 | 4.415275 |
| C  | 3.020668  | 3.659260 | 1.163004 |
| H  | 2.492950  | 3.867672 | 0.221376 |
| H  | 3.397807  | 4.616732 | 1.561446 |
| H  | 3.889429  | 3.016666 | 0.957615 |
| H  | 1.984952  | 0.448867 | 2.126290 |

## 25

B3LYP SCF energy: -3339.07327977 a.u.  
 B3LYP enthalpy: -3338.018473 a.u.  
 B3LYP free energy: -3338.183649 a.u.  
 M06-L SCF energy in solution: -3341.31686382 a.u.  
 M06-L enthalpy in solution: -3340.262057 a.u.  
 M06-L free energy in solution: -3340.427233 a.u.

### Cartesian coordinates

| ATOM | X         | Y         | Z         |
|------|-----------|-----------|-----------|
| P    | -1.877774 | -0.279590 | -0.936228 |
| C    | -1.892577 | 1.105059  | -2.163128 |
| C    | -0.665225 | 1.462222  | -2.752804 |
| C    | -3.053091 | 1.791941  | -2.552292 |
| C    | -0.605971 | 2.457289  | -3.731228 |
| H    | 0.254135  | 0.954386  | -2.449233 |
| C    | -2.990695 | 2.792214  | -3.528603 |
| H    | -4.013786 | 1.552363  | -2.095431 |
| C    | -1.771089 | 3.122969  | -4.125271 |
| H    | 0.354354  | 2.716453  | -4.183293 |
| H    | -3.905180 | 3.311917  | -3.825855 |
| H    | -1.727290 | 3.899482  | -4.892944 |
| C    | -3.533949 | -0.374138 | -0.158585 |
| C    | -4.698488 | -0.624464 | -0.915344 |
| C    | -3.688599 | -0.290426 | 1.235252  |
| C    | -5.948770 | -0.730514 | -0.322169 |
| H    | -4.629799 | -0.756317 | -1.997721 |
| C    | -4.931681 | -0.402675 | 1.850596  |
| H    | -2.808119 | -0.154739 | 1.865882  |
| C    | -6.110846 | -0.611424 | 1.086790  |
| H    | -6.809905 | -0.921605 | -0.960844 |

|   |           |           |           |
|---|-----------|-----------|-----------|
| H | -4.981661 | -0.338631 | 2.936536  |
| C | -1.934640 | -1.782192 | -2.024754 |
| C | -2.347272 | -2.998016 | -1.449673 |
| C | -1.663253 | -1.741728 | -3.401500 |
| C | -2.509780 | -4.136842 | -2.238237 |
| H | -2.568802 | -3.051732 | -0.381301 |
| C | -1.823074 | -2.887794 | -4.188763 |
| H | -1.351542 | -0.811281 | -3.877595 |
| C | -2.254413 | -4.084111 | -3.612756 |
| H | -2.841595 | -5.069838 | -1.776925 |
| H | -1.623338 | -2.835207 | -5.262045 |
| H | -2.392947 | -4.973917 | -4.231846 |
| N | -7.344847 | -0.708686 | 1.677252  |
| C | -8.526482 | -0.954259 | 0.868024  |
| H | -8.468612 | -1.916443 | 0.327868  |
| H | -9.410323 | -0.987121 | 1.516529  |
| H | -8.687623 | -0.156886 | 0.121051  |
| C | -7.473239 | -0.605409 | 3.120038  |
| H | -7.093107 | 0.359990  | 3.498947  |
| H | -8.531811 | -0.678102 | 3.397424  |
| H | -6.930544 | -1.411652 | 3.646605  |
| P | 1.466710  | -1.507172 | 0.595096  |
| C | 1.894478  | -2.009027 | 2.323565  |
| C | 0.841623  | -2.130945 | 3.248813  |
| C | 3.195951  | -2.338749 | 2.733068  |
| C | 1.079606  | -2.601191 | 4.542819  |
| H | -0.176362 | -1.861382 | 2.953351  |
| C | 3.434293  | -2.795640 | 4.033805  |
| H | 4.034013  | -2.238225 | 2.042429  |
| C | 2.378269  | -2.937754 | 4.937765  |
| H | 0.249408  | -2.697978 | 5.246745  |
| H | 4.453748  | -3.043728 | 4.339102  |
| H | 2.567469  | -3.300416 | 5.950859  |
| C | 2.992811  | -1.081271 | -0.314204 |
| C | 4.020054  | -2.021854 | -0.541381 |
| C | 3.144973  | 0.186525  | -0.900241 |
| C | 5.154375  | -1.701021 | -1.273433 |
| H | 3.928495  | -3.039100 | -0.154252 |
| C | 4.267095  | 0.521113  | -1.651074 |
| H | 2.359340  | 0.934485  | -0.771665 |
| C | 5.320506  | -0.410691 | -1.851078 |
| H | 5.915204  | -2.467906 | -1.410517 |
| H | 4.321454  | 1.518159  | -2.085622 |
| C | 1.033365  | -3.143692 | -0.168211 |
| C | 1.174580  | -3.302116 | -1.559213 |
| C | 0.633656  | -4.249834 | 0.600019  |
| C | 0.958986  | -4.543770 | -2.157695 |
| H | 1.481721  | -2.458205 | -2.179969 |
| C | 0.410344  | -5.491026 | -0.004996 |
| H | 0.521389  | -4.162641 | 1.681189  |
| C | 0.583186  | -5.644759 | -1.381875 |

|    |           |           |           |
|----|-----------|-----------|-----------|
| H  | 1.086712  | -4.650818 | -3.237139 |
| H  | 0.116425  | -6.344394 | 0.611304  |
| H  | 0.424837  | -6.619112 | -1.850581 |
| N  | 6.439865  | -0.089775 | -2.575105 |
| C  | 7.493682  | -1.071545 | -2.769048 |
| H  | 7.136034  | -1.962878 | -3.315072 |
| H  | 8.304302  | -0.623152 | -3.356041 |
| H  | 7.922328  | -1.411919 | -1.809806 |
| C  | 6.574715  | 1.231208  | -3.162310 |
| H  | 6.550716  | 2.027277  | -2.396601 |
| H  | 7.535980  | 1.300748  | -3.685605 |
| H  | 5.776094  | 1.444042  | -3.895998 |
| Pd | -0.086365 | 0.287625  | 0.627724  |
| C  | 2.280819  | 4.623283  | -0.770172 |
| C  | 1.861555  | 3.630311  | 0.101224  |
| C  | 0.500309  | 3.468688  | 0.443437  |
| C  | -0.463456 | 4.338175  | -0.164476 |
| C  | -0.003661 | 5.353892  | -1.042065 |
| C  | 1.340109  | 5.501131  | -1.338592 |
| H  | 3.341935  | 4.725688  | -1.010096 |
| H  | 2.599705  | 2.952977  | 0.523565  |
| C  | 0.056248  | 2.450198  | 1.401706  |
| C  | -1.879643 | 4.172623  | 0.099598  |
| H  | -0.724959 | 6.029660  | -1.501930 |
| H  | 1.666981  | 6.292263  | -2.017526 |
| C  | -2.284044 | 3.135225  | 0.906099  |
| C  | -1.344927 | 2.284394  | 1.545257  |
| H  | -3.346837 | 2.982128  | 1.105667  |
| H  | -1.706505 | 1.637627  | 2.346287  |
| C  | -2.888760 | 5.116700  | -0.494473 |
| H  | -2.696838 | 6.157479  | -0.185593 |
| H  | -2.860448 | 5.094657  | -1.596039 |
| H  | -3.907336 | 4.853007  | -0.178034 |
| C  | 0.902742  | 1.551196  | 2.157706  |
| Si | 2.563076  | 1.955896  | 3.051301  |
| C  | 2.560829  | 3.803566  | 3.474276  |
| H  | 1.638859  | 4.084566  | 4.009204  |
| H  | 3.410114  | 4.015123  | 4.146144  |
| H  | 2.655800  | 4.461328  | 2.598413  |
| C  | 2.483358  | 1.026184  | 4.693237  |
| H  | 1.588942  | 1.315052  | 5.269878  |
| H  | 2.466167  | -0.065068 | 4.562729  |
| H  | 3.364703  | 1.276737  | 5.306984  |
| C  | 4.185420  | 1.505230  | 2.193152  |
| H  | 4.369597  | 2.046591  | 1.253615  |
| H  | 5.009001  | 1.757272  | 2.882767  |
| H  | 4.250071  | 0.429497  | 1.974406  |
| H  | 0.307886  | 1.062060  | 2.946455  |

## 26

B3LYP SCF energy: -2273.36752179 a.u.

B3LYP enthalpy: -2272.798773 a.u.

B3LYP free energy: -2272.906356 a.u.

M06-L SCF energy in solution: -2274.81988069 a.u.

M06-L enthalpy in solution: -2274.251132 a.u.

M06-L free energy in solution: -2274.358715 a.u.

### Cartesian coordinates

| ATOM | X         | Y         | Z         |
|------|-----------|-----------|-----------|
| P    | -2.078862 | 0.043015  | -0.450965 |
| P    | 2.188093  | 0.004423  | -0.428223 |
| O    | 0.173105  | -1.020362 | 1.435829  |
| C    | -2.208907 | -1.111838 | 1.018539  |
| C    | -3.436699 | -1.702540 | 1.373575  |
| C    | -3.549233 | -2.588312 | 2.447183  |
| C    | -2.416636 | -2.922829 | 3.193495  |
| C    | -1.182744 | -2.365723 | 2.858916  |
| C    | -1.078692 | -1.462633 | 1.793424  |
| C    | 0.524598  | 0.461378  | 3.334125  |
| C    | 0.858090  | -0.014756 | 2.063263  |
| C    | 1.955206  | 0.520499  | 1.344518  |
| C    | 2.719737  | 1.517759  | 1.966961  |
| C    | 2.405032  | 1.987473  | 3.246997  |
| C    | 1.302111  | 1.464246  | 3.922207  |
| C    | -3.570409 | -0.462793 | -1.438635 |
| C    | -3.431355 | -1.582921 | -2.278977 |
| C    | -4.492167 | -2.010976 | -3.078710 |
| C    | -5.705253 | -1.312665 | -3.069479 |
| C    | -5.848627 | -0.189024 | -2.252084 |
| C    | -4.790343 | 0.232871  | -1.438658 |
| C    | -2.599960 | 1.675313  | 0.262806  |
| C    | -3.256578 | 1.825927  | 1.495140  |
| C    | -3.616202 | 3.096252  | 1.958847  |
| C    | -3.331297 | 4.231614  | 1.196162  |
| C    | -2.675369 | 4.093283  | -0.031824 |
| C    | -2.304031 | 2.827113  | -0.489022 |
| C    | 3.591264  | 1.086278  | -0.980011 |
| C    | 3.259871  | 2.292349  | -1.622081 |
| C    | 4.258822  | 3.159626  | -2.071478 |
| C    | 5.606016  | 2.824227  | -1.902059 |
| C    | 5.947047  | 1.620495  | -1.277939 |
| C    | 4.947532  | 0.757547  | -0.817146 |
| C    | 2.983239  | -1.663680 | -0.298603 |
| C    | 2.994578  | -2.473455 | -1.447583 |
| C    | 3.584029  | -3.739443 | -1.421215 |
| C    | 4.155426  | -4.222987 | -0.239330 |
| C    | 4.137614  | -3.431175 | 0.912197  |
| C    | 3.557664  | -2.158337 | 0.883172  |
| H    | -4.326728 | -1.467448 | 0.786957  |

|    |           |           |           |   |           |           |           |
|----|-----------|-----------|-----------|---|-----------|-----------|-----------|
| H  | -4.520988 | -3.024145 | 2.691470  | C | 0.290085  | 2.296942  | 2.291961  |
| H  | -2.487973 | -3.627315 | 4.025942  | C | 2.802313  | 3.380249  | 1.274042  |
| H  | 3.569629  | 1.947392  | 1.433791  | C | 2.395506  | 2.048940  | 1.144867  |
| H  | 3.016592  | 2.767518  | 3.706299  | C | 3.092956  | 1.144454  | 0.317332  |
| H  | 1.037616  | 1.833003  | 4.916625  | C | 4.223147  | 1.617417  | -0.366680 |
| H  | -2.476916 | -2.116996 | -2.309094 | C | 4.644434  | 2.944455  | -0.239576 |
| H  | -4.368046 | -2.886377 | -3.721687 | C | 3.929779  | 3.822903  | 0.577059  |
| H  | -6.532876 | -1.640350 | -3.703969 | C | -2.843141 | 1.830750  | -0.484924 |
| H  | -6.790517 | 0.366265  | -2.243961 | C | -3.808457 | 1.174473  | 0.301410  |
| H  | -4.919342 | 1.111866  | -0.803751 | C | -5.170356 | 1.361639  | 0.062083  |
| H  | -3.489614 | 0.949684  | 2.102910  | C | -5.595024 | 2.183904  | -0.987147 |
| H  | -4.122118 | 3.196404  | 2.922928  | C | -4.645800 | 2.819100  | -1.790714 |
| H  | -3.612450 | 5.223166  | 1.560571  | C | -3.279743 | 2.649328  | -1.539779 |
| H  | -2.440211 | 4.976884  | -0.630992 | C | -0.213182 | 2.667794  | -1.299381 |
| H  | -1.765122 | 2.722727  | -1.434894 | C | -0.053548 | 4.044059  | -1.068023 |
| H  | 2.205808  | 2.542689  | -1.774795 | C | 0.554315  | 4.859856  | -2.027013 |
| H  | 3.984052  | 4.094971  | -2.566195 | C | 1.002577  | 4.314489  | -3.233861 |
| H  | 6.389025  | 3.496415  | -2.262860 | C | 0.844046  | 2.946942  | -3.476551 |
| H  | 6.998273  | 1.348977  | -1.148905 | C | 0.247261  | 2.129554  | -2.512699 |
| H  | 5.228364  | -0.179775 | -0.332041 | C | 3.418365  | -1.248931 | -1.255927 |
| H  | 2.527615  | -2.108342 | -2.366786 | C | 2.922669  | -1.209122 | -2.570126 |
| H  | 3.586947  | -4.355761 | -2.324167 | C | 3.675928  | -1.716698 | -3.632945 |
| H  | 4.608131  | -5.217746 | -0.215082 | C | 4.931034  | -2.283527 | -3.394861 |
| H  | 4.577991  | -3.804577 | 1.840764  | C | 5.430249  | -2.338499 | -2.089331 |
| H  | 3.551633  | -1.547380 | 1.788876  | C | 4.680518  | -1.825309 | -1.027295 |
| H  | -0.338476 | 0.051181  | 3.859854  | C | 2.957684  | -1.476416 | 1.578334  |
| H  | -0.275864 | -2.634475 | 3.404367  | C | 2.678848  | -2.855655 | 1.635984  |
| Pd | 0.052218  | 0.084433  | -1.308721 | C | 3.062457  | -3.615001 | 2.742583  |
|    |           |           |           | C | 3.716852  | -3.007204 | 3.820525  |
|    |           |           |           | C | 3.991396  | -1.638706 | 3.775788  |
|    |           |           |           | C | 3.618832  | -0.877929 | 2.661377  |
|    |           |           |           | H | -2.836805 | 3.357430  | 1.499866  |
|    |           |           |           | H | -2.624838 | 4.415117  | 3.714846  |
|    |           |           |           | H | -0.550537 | 4.077147  | 5.076197  |
|    |           |           |           | H | 4.777075  | 0.940259  | -1.018951 |
|    |           |           |           | H | 5.526490  | 3.289691  | -0.783827 |
|    |           |           |           | H | 4.247726  | 4.863764  | 0.678148  |
|    |           |           |           | H | -3.492932 | 0.515667  | 1.114086  |
|    |           |           |           | H | -5.903057 | 0.848065  | 0.688456  |
|    |           |           |           | H | -6.661968 | 2.322691  | -1.180163 |
|    |           |           |           | H | -4.965948 | 3.459543  | -2.617074 |
|    |           |           |           | H | -2.554270 | 3.165244  | -2.170404 |
|    |           |           |           | H | -0.407205 | 4.485998  | -0.134046 |
|    |           |           |           | H | 0.676462  | 5.928236  | -1.829745 |
|    |           |           |           | H | 1.478003  | 4.953875  | -3.982285 |
|    |           |           |           | H | 1.194129  | 2.511433  | -4.416027 |
|    |           |           |           | H | 0.134969  | 1.057070  | -2.694472 |
|    |           |           |           | H | 1.932354  | -0.788028 | -2.756273 |
|    |           |           |           | H | 3.274217  | -1.679274 | -4.648882 |
|    |           |           |           | H | 5.517421  | -2.688153 | -4.223999 |
|    |           |           |           | H | 6.409549  | -2.784250 | -1.895356 |

### 27-ts

B3LYP SCF energy: -5271.52565880 a.u.  
 B3LYP enthalpy: -5270.780942 a.u.  
 B3LYP free energy: -5270.912853 a.u.  
 M06-L SCF energy in solution: -5273.50622082 a.u.  
 M06-L enthalpy in solution: -5272.761504 a.u.  
 M06-L free energy in solution: -5272.893415 a.u.  
 Imaginary frequency: -144.8710 cm<sup>-1</sup>

### Cartesian coordinates

| ATOM | X         | Y         | Z         |
|------|-----------|-----------|-----------|
| P    | -1.052718 | 1.518118  | -0.107046 |
| P    | 2.363474  | -0.541236 | 0.091991  |
| O    | 1.326227  | 1.518555  | 1.823850  |
| C    | -0.882036 | 2.434796  | 1.518593  |
| C    | -1.915628 | 3.217609  | 2.066180  |
| C    | -1.799884 | 3.813939  | 3.324881  |
| C    | -0.641481 | 3.630829  | 4.082853  |
| C    | 0.404943  | 2.867670  | 3.562897  |

|    |           |           |           |   |           |           |           |
|----|-----------|-----------|-----------|---|-----------|-----------|-----------|
| H  | 5.081224  | -1.875722 | -0.012400 | C | -1.264597 | 3.567649  | -2.863835 |
| H  | 2.162769  | -3.340387 | 0.802353  | C | -0.887984 | 2.715195  | -1.822754 |
| H  | 2.844718  | -4.686083 | 2.765468  | C | -3.136047 | 3.341986  | -0.047877 |
| H  | 4.011238  | -3.599869 | 4.690503  | C | -2.659000 | 2.061485  | -0.333627 |
| H  | 4.504784  | -1.155168 | 4.611350  | C | -3.070563 | 0.937007  | 0.404008  |
| H  | 3.853199  | 0.187889  | 2.637906  | C | -3.987859 | 1.130837  | 1.446011  |
| H  | 2.241908  | 4.063246  | 1.913180  | C | -4.475504 | 2.407567  | 1.745234  |
| H  | 1.321008  | 2.697318  | 4.132167  | C | -4.047836 | 3.507847  | 0.999466  |
| Pd | -0.093780 | -0.689246 | -0.229786 | C | 2.709353  | 1.808107  | 0.212859  |
| C  | -4.764053 | -1.758707 | -2.109467 | C | 3.559369  | 1.639603  | -0.895944 |
| C  | -3.428126 | -1.823633 | -1.763955 | C | 4.937013  | 1.819831  | -0.769669 |
| C  | -3.020556 | -2.149211 | -0.446080 | C | 5.493021  | 2.156443  | 0.468814  |
| C  | -4.026071 | -2.392253 | 0.555726  | C | 4.660111  | 2.314531  | 1.577176  |
| C  | -5.391770 | -2.312490 | 0.160731  | C | 3.277258  | 2.143806  | 1.451830  |
| C  | -5.755761 | -2.011764 | -1.137555 | C | 0.220585  | 2.244993  | 1.587926  |
| H  | -5.051766 | -1.511249 | -3.134160 | C | 0.122569  | 3.635962  | 1.762398  |
| H  | -2.657142 | -1.637286 | -2.512946 | C | -0.307651 | 4.167538  | 2.980204  |
| C  | -1.634005 | -2.265428 | -0.065288 | C | -0.642192 | 3.318395  | 4.040241  |
| C  | -3.645794 | -2.717623 | 1.906099  | C | -0.548025 | 1.934331  | 3.875877  |
| H  | -6.170237 | -2.502870 | 0.901592  | C | -0.122027 | 1.401414  | 2.655465  |
| H  | -6.813163 | -1.967283 | -1.411474 | C | -3.069451 | -1.824793 | 1.176885  |
| C  | -2.300368 | -2.849891 | 2.197531  | C | -2.391918 | -2.108375 | 2.373773  |
| C  | -1.293706 | -2.693439 | 1.215990  | C | -2.971327 | -2.931578 | 3.341684  |
| H  | -1.994375 | -3.122518 | 3.211877  | C | -4.230096 | -3.497663 | 3.118090  |
| H  | -0.257565 | -2.920366 | 1.469134  | C | -4.904807 | -3.235657 | 1.922523  |
| Br | -0.332036 | -2.972312 | -1.583307 | C | -4.329393 | -2.403543 | 0.957061  |
| C  | -4.687684 | -2.951562 | 2.971125  | C | -3.093472 | -1.079055 | -1.652777 |
| H  | -5.339412 | -2.072279 | 3.114148  | C | -2.531190 | -2.067994 | -2.478537 |
| H  | -5.350088 | -3.799124 | 2.723058  | C | -3.127607 | -2.390758 | -3.700997 |
| H  | -4.214071 | -3.173772 | 3.938456  | C | -4.286867 | -1.732306 | -4.119887 |
|    |           |           |           | C | -4.852367 | -0.747550 | -3.305236 |
|    |           |           |           | C | -4.260899 | -0.422365 | -2.080972 |
|    |           |           |           | H | 2.306012  | 3.780148  | -1.366908 |
|    |           |           |           | H | 1.637989  | 5.325346  | -3.164504 |
|    |           |           |           | H | -0.649195 | 5.174745  | -4.168445 |
|    |           |           |           | H | -4.322077 | 0.273715  | 2.032938  |
|    |           |           |           | H | -5.188657 | 2.539128  | 2.562183  |
|    |           |           |           | H | -4.424287 | 4.507960  | 1.228738  |
|    |           |           |           | H | 3.148864  | 1.356186  | -1.865325 |
|    |           |           |           | H | 5.578926  | 1.682162  | -1.642996 |
|    |           |           |           | H | 6.573392  | 2.287739  | 0.569125  |
|    |           |           |           | H | 5.083727  | 2.569700  | 2.551734  |
|    |           |           |           | H | 2.646697  | 2.269687  | 2.332425  |
|    |           |           |           | H | 0.387081  | 4.311224  | 0.945894  |
|    |           |           |           | H | -0.380655 | 5.251348  | 3.101814  |
|    |           |           |           | H | -0.978543 | 3.736410  | 4.992508  |
|    |           |           |           | H | -0.810990 | 1.263170  | 4.697164  |
|    |           |           |           | H | -0.052521 | 0.318910  | 2.528326  |
|    |           |           |           | H | -1.391194 | -1.704376 | 2.537062  |
|    |           |           |           | H | -2.428162 | -3.147232 | 4.265229  |
|    |           |           |           | H | -4.679389 | -4.151556 | 3.870081  |

## 28

B3LYP SCF energy: -5271.57140590 a.u.  
 B3LYP enthalpy: -5270.824366 a.u.  
 B3LYP free energy: -5270.955267 a.u.  
 M06-L SCF energy in solution: -5273.55340523 a.u.  
 M06-L enthalpy in solution: -5272.806365 a.u.  
 M06-L free energy in solution: -5272.937266 a.u.

### Cartesian coordinates

| ATOM | X         | Y         | Z         |
|------|-----------|-----------|-----------|
| P    | 0.891711  | 1.496378  | 0.032526  |
| P    | -2.277084 | -0.675276 | -0.033721 |
| O    | -1.789186 | 1.784918  | -1.364589 |
| C    | 0.410268  | 2.741318  | -1.274693 |
| C    | 1.298699  | 3.709956  | -1.776414 |
| C    | 0.922038  | 4.585832  | -2.798323 |
| C    | -0.356389 | 4.506710  | -3.354815 |

|    |           |           |           |   |           |           |           |
|----|-----------|-----------|-----------|---|-----------|-----------|-----------|
| H  | -5.883767 | -3.684490 | 1.734911  | C | -0.111897 | -4.583277 | -3.725523 |
| H  | -4.865243 | -2.212360 | 0.025154  | C | 0.880205  | -3.880162 | -3.039547 |
| H  | -1.632080 | -2.597107 | -2.154950 | C | 0.526706  | -3.060711 | -1.964927 |
| H  | -2.677198 | -3.163909 | -4.328840 | C | 2.563173  | -4.182087 | -0.133981 |
| H  | -4.748849 | -1.985176 | -5.077938 | C | 2.282672  | -2.826792 | -0.313291 |
| H  | -5.760134 | -0.226617 | -3.621554 | C | 2.831157  | -1.840542 | 0.528310  |
| H  | -4.717523 | 0.350980  | -1.460261 | C | 3.701708  | -2.248020 | 1.547264  |
| H  | -2.799043 | 4.198240  | -0.633424 | C | 4.000097  | -3.602526 | 1.733627  |
| H  | -2.271056 | 3.476133  | -3.276760 | C | 3.424883  | -4.563179 | 0.899537  |
| Pd | 0.244837  | -0.799265 | -0.204246 | C | -3.054736 | -1.715292 | -0.193751 |
| C  | 3.875253  | -1.963495 | 2.615565  | C | -3.722422 | -1.193333 | -1.316798 |
| C  | 2.908762  | -1.624343 | 1.692105  | C | -5.116249 | -1.143188 | -1.355023 |
| C  | 3.174432  | -1.616290 | 0.293667  | C | -5.866723 | -1.598655 | -0.266003 |
| C  | 4.495171  | -1.989853 | -0.151543 | C | -5.213218 | -2.107077 | 0.857601  |
| C  | 5.469117  | -2.331476 | 0.831241  | C | -3.816030 | -2.167540 | 0.895129  |
| C  | 5.172864  | -2.318718 | 2.178881  | C | -0.818592 | -2.727886 | 1.328872  |
| H  | 3.638202  | -1.967298 | 3.682826  | C | -0.932266 | -4.128381 | 1.337658  |
| H  | 1.899119  | -1.370781 | 2.020467  | C | -0.689352 | -4.852054 | 2.507828  |
| C  | 2.174578  | -1.268489 | -0.669266 | C | -0.336188 | -4.186996 | 3.686242  |
| C  | 4.793295  | -2.024322 | -1.555554 | C | -0.222665 | -2.794294 | 3.688420  |
| H  | 6.472582  | -2.616677 | 0.510046  | C | -0.457484 | -2.069871 | 2.515775  |
| H  | 5.939424  | -2.590898 | 2.909617  | C | 3.197940  | 0.878609  | 1.448832  |
| C  | 3.787148  | -1.700920 | -2.446546 | C | 2.832159  | 0.713894  | 2.799401  |
| C  | 2.489497  | -1.327438 | -2.012515 | C | 3.421212  | 1.490034  | 3.798610  |
| H  | 3.991275  | -1.738318 | -3.521548 | C | 4.369311  | 2.463303  | 3.463768  |
| H  | 1.735357  | -1.096731 | -2.770694 | C | 4.724122  | 2.649620  | 2.126976  |
| Br | -0.042127 | -3.293452 | -0.126225 | C | 4.146796  | 1.861026  | 1.125166  |
| C  | 6.161512  | -2.422479 | -2.052956 | C | 3.175624  | 0.216301  | -1.412599 |
| H  | 6.952729  | -1.755534 | -1.669063 | C | 2.481009  | 0.765792  | -2.500753 |
| H  | 6.431245  | -3.446067 | -1.740967 | C | 3.131982  | 0.990083  | -3.718174 |
| H  | 6.202905  | -2.389944 | -3.151726 | C | 4.482632  | 0.663681  | -3.861647 |

## 29

B3LYP SCF energy: -3139.17961758 a.u.  
 B3LYP enthalpy: -3138.342773 a.u.  
 B3LYP free energy: -3138.490232 a.u.  
 M06-L SCF energy in solution: -3141.42599057 a.u.  
 M06-L enthalpy in solution: -3140.589146 a.u.  
 M06-L free energy in solution: -3140.736605 a.u.

### Cartesian coordinates

| ATOM | X         | Y         | Z         |
|------|-----------|-----------|-----------|
| P    | -1.204313 | -1.711178 | -0.172062 |
| P    | 2.284271  | -0.105482 | 0.179764  |
| O    | 1.493129  | -2.327517 | -1.319506 |
| C    | -0.813311 | -2.890227 | -1.567077 |
| C    | -1.791059 | -3.614598 | -2.271797 |
| C    | -1.446691 | -4.455201 | -3.334391 |

|   |           |           |           |
|---|-----------|-----------|-----------|
| C | -0.111897 | -4.583277 | -3.725523 |
| C | 0.880205  | -3.880162 | -3.039547 |
| C | 0.526706  | -3.060711 | -1.964927 |
| C | 2.563173  | -4.182087 | -0.133981 |
| C | 2.282672  | -2.826792 | -0.313291 |
| C | 2.831157  | -1.840542 | 0.528310  |
| C | 3.701708  | -2.248020 | 1.547264  |
| C | 4.000097  | -3.602526 | 1.733627  |
| C | 3.424883  | -4.563179 | 0.899537  |
| C | -3.054736 | -1.715292 | -0.193751 |
| C | -3.722422 | -1.193333 | -1.316798 |
| C | -5.116249 | -1.143188 | -1.355023 |
| C | -5.866723 | -1.598655 | -0.266003 |
| C | -5.213218 | -2.107077 | 0.857601  |
| C | -3.816030 | -2.167540 | 0.895129  |
| C | -0.818592 | -2.727886 | 1.328872  |
| C | -0.932266 | -4.128381 | 1.337658  |
| C | -0.689352 | -4.852054 | 2.507828  |
| C | -0.336188 | -4.186996 | 3.686242  |
| C | -0.222665 | -2.794294 | 3.688420  |
| C | -0.457484 | -2.069871 | 2.515775  |
| C | 3.197940  | 0.878609  | 1.448832  |
| C | 2.832159  | 0.713894  | 2.799401  |
| C | 3.421212  | 1.490034  | 3.798610  |
| C | 4.369311  | 2.463303  | 3.463768  |
| C | 4.724122  | 2.649620  | 2.126976  |
| C | 4.146796  | 1.861026  | 1.125166  |
| C | 3.175624  | 0.216301  | -1.412599 |
| C | 2.481009  | 0.765792  | -2.500753 |
| C | 3.131982  | 0.990083  | -3.718174 |
| C | 4.482632  | 0.663681  | -3.861647 |
| C | 5.180855  | 0.104810  | -2.785596 |
| C | 4.531045  | -0.122031 | -1.570256 |
| H | -2.839551 | -3.519982 | -1.988970 |
| H | -2.229667 | -5.005534 | -3.861263 |
| H | 0.159305  | -5.225819 | -4.566641 |
| H | 4.149109  | -1.502450 | 2.206494  |
| H | 4.680502  | -3.903490 | 2.533336  |
| H | 3.649582  | -5.622682 | 1.045397  |
| H | -3.153412 | -0.814451 | -2.167005 |
| H | -5.616015 | -0.732316 | -2.235364 |
| H | -6.958224 | -1.549991 | -0.291944 |
| H | -5.789952 | -2.458314 | 1.716877  |
| H | -3.325433 | -2.565435 | 1.784006  |
| H | -1.215172 | -4.659800 | 0.426604  |
| H | -0.778933 | -5.941366 | 2.498947  |
| H | -0.148383 | -4.754490 | 4.601241  |
| H | 0.052066  | -2.267209 | 4.605562  |
| H | -0.361499 | -0.981183 | 2.519102  |
| H | 2.074995  | -0.025824 | 3.072460  |
| H | 3.128257  | 1.345029  | 4.841525  |

|    |           |           |           |
|----|-----------|-----------|-----------|
| H  | 4.819204  | 3.082762  | 4.243382  |
| H  | 5.448117  | 3.420286  | 1.852435  |
| H  | 4.436360  | 2.027909  | 0.086647  |
| H  | 1.422676  | 1.015426  | -2.395960 |
| H  | 2.578638  | 1.421626  | -4.555835 |
| H  | 4.992035  | 0.841427  | -4.812227 |
| H  | 6.236352  | -0.158033 | -2.893363 |
| H  | 5.083676  | -0.568470 | -0.740279 |
| H  | 2.116583  | -4.929441 | -0.790664 |
| H  | 1.930436  | -3.947245 | -3.329991 |
| Pd | -0.149165 | 0.537282  | 0.031073  |
| C  | -3.729632 | 1.579401  | 2.979704  |
| C  | -2.767820 | 1.334168  | 2.021604  |
| C  | -2.966439 | 1.661544  | 0.650071  |
| C  | -4.213132 | 2.285171  | 0.275727  |
| C  | -5.186294 | 2.517899  | 1.290116  |
| C  | -4.956941 | 2.174813  | 2.607154  |
| H  | -3.542791 | 1.320637  | 4.025271  |
| H  | -1.812378 | 0.887262  | 2.304601  |
| C  | -1.963874 | 1.406343  | -0.342745 |
| C  | -4.438915 | 2.666463  | -1.090071 |
| H  | -6.134611 | 2.986322  | 1.021010  |
| H  | -5.720637 | 2.371397  | 3.364382  |
| C  | -3.434395 | 2.427625  | -2.008723 |
| C  | -2.211070 | 1.809742  | -1.641363 |
| H  | -3.579863 | 2.728247  | -3.051237 |
| H  | -1.455866 | 1.665316  | -2.420331 |
| C  | -5.726416 | 3.330277  | -1.512923 |
| H  | -6.606178 | 2.696902  | -1.305896 |
| H  | -5.890505 | 4.284485  | -0.983744 |
| H  | -5.718794 | 3.547550  | -2.591129 |
| C  | 1.003401  | 3.155728  | -0.485599 |
| H  | 2.056628  | 2.891817  | -0.638859 |
| C  | 0.346306  | 2.563665  | 0.643071  |
| H  | -0.573079 | 3.073781  | 0.942092  |
| H  | 1.006431  | 2.363190  | 1.495246  |
| C  | 0.488530  | 4.112041  | -1.342675 |
| H  | -0.582933 | 4.332359  | -1.315736 |
| H  | 0.993911  | 4.290808  | -2.296496 |
| B  | 1.203064  | 5.710903  | -0.447383 |
| F  | 0.726758  | 6.668596  | -1.290678 |
| F  | 0.646351  | 5.718373  | 0.794161  |
| F  | 2.560515  | 5.560903  | -0.471595 |

### 30-ts

B3LYP SCF energy: -3139.17957259 a.u.  
 B3LYP enthalpy: -3138.343760 a.u.  
 B3LYP free energy: -3138.489983 a.u.

M06-L SCF energy in solution: -3141.42278104 a.u.

M06-L enthalpy in solution: -3140.586968 a.u.

M06-L free energy in solution: -3140.733191 a.u.

Imaginary frequency: -48.5112 cm<sup>-1</sup>

### Cartesian coordinates

| ATOM | X         | Y         | Z         |
|------|-----------|-----------|-----------|
| P    | -1.227467 | -1.703831 | -0.148530 |
| P    | 2.268570  | -0.148934 | 0.168047  |
| O    | 1.440976  | -2.337720 | -1.387072 |
| C    | -0.882601 | -2.885670 | -1.553409 |
| C    | -1.886350 | -3.604609 | -2.227250 |
| C    | -1.584308 | -4.432468 | -3.312244 |
| C    | -0.266504 | -4.552235 | -3.759567 |
| C    | 0.751067  | -3.856831 | -3.103992 |
| C    | 0.441038  | -3.052438 | -2.004615 |
| C    | 2.494965  | -4.223448 | -0.241586 |
| C    | 2.226264  | -2.861465 | -0.388133 |
| C    | 2.788147  | -1.900852 | 0.473498  |
| C    | 3.661356  | -2.341987 | 1.476782  |
| C    | 3.946614  | -3.703010 | 1.630668  |
| C    | 3.357189  | -4.638363 | 0.777847  |
| C    | -3.078708 | -1.687839 | -0.130281 |
| C    | -3.763676 | -1.151831 | -1.236358 |
| C    | -5.157342 | -1.089515 | -1.247377 |
| C    | -5.891029 | -1.546119 | -0.147340 |
| C    | -5.220463 | -2.068279 | 0.959679  |
| C    | -3.823234 | -2.141331 | 0.969532  |
| C    | -0.824998 | -2.720286 | 1.347718  |
| C    | -0.916632 | -4.122105 | 1.356226  |
| C    | -0.659688 | -4.842241 | 2.525772  |
| C    | -0.314494 | -4.172352 | 3.703707  |
| C    | -0.223697 | -2.777805 | 3.706490  |
| C    | -0.472333 | -2.057028 | 2.534580  |
| C    | 3.182761  | 0.788586  | 1.471866  |
| C    | 2.813822  | 0.578320  | 2.815269  |
| C    | 3.395417  | 1.324773  | 3.841170  |
| C    | 4.339795  | 2.313139  | 3.542169  |
| C    | 4.697123  | 2.545135  | 2.213223  |
| C    | 4.126176  | 1.787542  | 1.184124  |
| C    | 3.178679  | 0.195019  | -1.408862 |
| C    | 2.483098  | 0.711903  | -2.512225 |
| C    | 3.143116  | 0.940252  | -3.723912 |
| C    | 4.504482  | 0.651870  | -3.845986 |
| C    | 5.204482  | 0.126226  | -2.754398 |
| C    | 4.545268  | -0.106283 | -1.545327 |
| H    | -2.923193 | -3.513418 | -1.903284 |
| H    | -2.387373 | -4.978091 | -3.813258 |
| H    | -0.028523 | -5.183369 | -4.619226 |
| H    | 4.121084  | -1.617152 | 2.150433  |

|    |           |           |           |
|----|-----------|-----------|-----------|
| H  | 4.628374  | -4.028915 | 2.419449  |
| H  | 3.571528  | -5.703294 | 0.897653  |
| H  | -3.207924 | -0.771340 | -2.094564 |
| H  | -5.670196 | -0.668269 | -2.115246 |
| H  | -6.982374 | -1.487443 | -0.151949 |
| H  | -5.783469 | -2.420881 | 1.827530  |
| H  | -3.319645 | -2.551397 | 1.845671  |
| H  | -1.193132 | -4.657566 | 0.445570  |
| H  | -0.731939 | -5.932862 | 2.516615  |
| H  | -0.115502 | -4.737238 | 4.618006  |
| H  | 0.043907  | -2.246689 | 4.623510  |
| H  | -0.394828 | -0.966712 | 2.537874  |
| H  | 2.060274  | -0.174030 | 3.062577  |
| H  | 3.099932  | 1.143614  | 4.877744  |
| H  | 4.784869  | 2.908119  | 4.343381  |
| H  | 5.418950  | 3.327211  | 1.966173  |
| H  | 4.417581  | 1.992321  | 0.152924  |
| H  | 1.417568  | 0.935123  | -2.421244 |
| H  | 2.588739  | 1.345958  | -4.573777 |
| H  | 5.021090  | 0.833405  | -4.791991 |
| H  | 6.268439  | -0.107207 | -2.845556 |
| H  | 5.099335  | -0.530332 | -0.704484 |
| H  | 2.038762  | -4.949906 | -0.914961 |
| H  | 1.789577  | -3.919482 | -3.434896 |
| Pd | -0.149106 | 0.535350  | 0.020562  |
| C  | -3.708522 | 1.702385  | 2.947775  |
| C  | -2.753347 | 1.418015  | 1.993903  |
| C  | -2.943544 | 1.729576  | 0.617326  |
| C  | -4.175667 | 2.375109  | 0.232414  |
| C  | -5.142407 | 2.648782  | 1.242889  |
| C  | -4.920533 | 2.322732  | 2.565505  |
| H  | -3.528433 | 1.455330  | 3.997408  |
| H  | -1.809121 | 0.951128  | 2.282885  |
| C  | -1.944366 | 1.436867  | -0.368996 |
| C  | -4.393217 | 2.736662  | -1.140012 |
| H  | -6.079461 | 3.135131  | 0.966071  |
| H  | -5.678714 | 2.550963  | 3.319476  |
| C  | -3.393401 | 2.460512  | -2.053593 |
| C  | -2.182758 | 1.824980  | -1.674486 |
| H  | -3.532870 | 2.745329  | -3.101494 |
| H  | -1.429503 | 1.653536  | -2.449936 |
| C  | -5.666263 | 3.420230  | -1.575364 |
| H  | -6.560288 | 2.813782  | -1.349705 |
| H  | -5.805644 | 4.391267  | -1.069987 |
| H  | -5.657522 | 3.610029  | -2.658792 |
| C  | 1.048931  | 3.160046  | -0.529370 |
| H  | 2.093653  | 2.876405  | -0.703285 |
| C  | 0.390843  | 2.549970  | 0.599474  |
| H  | -0.513473 | 3.078370  | 0.914180  |
| H  | 1.059650  | 2.353902  | 1.446639  |
| C  | 0.538002  | 4.125139  | -1.364345 |

|   |           |          |           |
|---|-----------|----------|-----------|
| H | -0.520578 | 4.394357 | -1.305816 |
| H | 1.051174  | 4.353309 | -2.302452 |
| B | 1.366055  | 5.743133 | -0.385372 |
| F | 0.811246  | 6.708571 | -1.154881 |
| F | 0.905443  | 5.667352 | 0.882700  |
| F | 2.700214  | 5.560099 | -0.548326 |

### 31

B3LYP SCF energy: -2814.85932810 a.u.

B3LYP enthalpy: -2814.041301 a.u.

B3LYP free energy: -2814.177257 a.u.

M06-L SCF energy in solution: -2816.79580684 a.u.

M06-L enthalpy in solution: -2815.977780 a.u.

M06-L free energy in solution: -2816.113736 a.u.

### Cartesian coordinates

| ATOM | X         | Y         | Z         |
|------|-----------|-----------|-----------|
| P    | 0.876695  | 1.461650  | -0.083618 |
| P    | -2.281056 | -0.750514 | 0.072857  |
| O    | -1.883613 | 1.735163  | -1.195169 |
| C    | 0.292001  | 2.706059  | -1.351003 |
| C    | 1.129373  | 3.650203  | -1.971269 |
| C    | 0.642240  | 4.522437  | -2.949319 |
| C    | -0.697580 | 4.462679  | -3.340767 |
| C    | -1.552137 | 3.536655  | -2.739631 |
| C    | -1.058342 | 2.685748  | -1.747661 |
| C    | -3.209524 | 3.249767  | 0.190127  |
| C    | -2.723338 | 1.983143  | -0.138789 |
| C    | -3.095019 | 0.835793  | 0.588021  |
| C    | -3.997940 | 0.991777  | 1.648240  |
| C    | -4.499605 | 2.253838  | 1.985626  |
| C    | -4.099613 | 3.377938  | 1.260796  |
| C    | 2.704784  | 1.751631  | -0.128364 |
| C    | 3.407908  | 1.403540  | -1.296191 |
| C    | 4.791721  | 1.566162  | -1.369017 |
| C    | 5.500033  | 2.062903  | -0.269684 |
| C    | 4.813678  | 2.396997  | 0.898798  |
| C    | 3.424526  | 2.244624  | 0.970604  |
| C    | 0.382695  | 2.279296  | 1.507055  |
| C    | 0.290313  | 3.674426  | 1.649350  |
| C    | -0.041142 | 4.242307  | 2.882129  |
| C    | -0.282809 | 3.425504  | 3.991461  |
| C    | -0.192897 | 2.037264  | 3.861406  |
| C    | 0.133251  | 1.468668  | 2.626329  |
| C    | -3.083951 | -1.971872 | 1.210630  |
| C    | -2.685593 | -1.965306 | 2.561253  |
| C    | -3.213809 | -2.885355 | 3.468374  |
| C    | -4.135798 | -3.845317 | 3.036794  |

|    |           |           |           |
|----|-----------|-----------|-----------|
| C  | -4.522856 | -3.874547 | 1.695774  |
| C  | -4.002973 | -2.944351 | 0.788068  |
| C  | -3.090848 | -1.036370 | -1.570278 |
| C  | -2.316466 | -1.493711 | -2.647394 |
| C  | -2.898471 | -1.693805 | -3.903592 |
| C  | -4.257750 | -1.436273 | -4.097835 |
| C  | -5.036051 | -0.972708 | -3.031387 |
| C  | -4.455869 | -0.770087 | -1.776906 |
| H  | 2.181458  | 3.702350  | -1.689528 |
| H  | 1.318203  | 5.246023  | -3.411236 |
| H  | -1.078302 | 5.131038  | -4.116950 |
| H  | -4.312185 | 0.119305  | 2.223038  |
| H  | -5.201073 | 2.354525  | 2.816976  |
| H  | -4.483023 | 4.367145  | 1.523370  |
| H  | 2.873499  | 0.993749  | -2.154858 |
| H  | 5.319300  | 1.288252  | -2.284579 |
| H  | 6.585380  | 2.180794  | -0.322806 |
| H  | 5.358760  | 2.777050  | 1.766604  |
| H  | 2.907673  | 2.508835  | 1.894034  |
| H  | 0.480923  | 4.325100  | 0.793251  |
| H  | -0.109893 | 5.329256  | 2.976419  |
| H  | -0.541957 | 3.871433  | 4.955227  |
| H  | -0.380142 | 1.391685  | 4.723296  |
| H  | 0.198137  | 0.382404  | 2.523844  |
| H  | -1.950033 | -1.233799 | 2.906398  |
| H  | -2.894675 | -2.860955 | 4.513491  |
| H  | -4.542420 | -4.573371 | 3.743264  |
| H  | -5.233489 | -4.628038 | 1.346464  |
| H  | -4.315761 | -2.985932 | -0.256318 |
| H  | -1.253022 | -1.694085 | -2.500450 |
| H  | -2.282554 | -2.051604 | -4.732506 |
| H  | -4.711478 | -1.592395 | -5.080131 |
| H  | -6.099145 | -0.763735 | -3.177547 |
| H  | -5.070397 | -0.396545 | -0.954334 |
| H  | -2.896689 | 4.123713  | -0.382336 |
| H  | -2.600061 | 3.452195  | -3.034215 |
| Pd | 0.202326  | -0.984642 | -0.059068 |
| C  | 3.915513  | -1.573883 | 2.862411  |
| C  | 2.926424  | -1.453685 | 1.907707  |
| C  | 3.178915  | -1.667737 | 0.522353  |
| C  | 4.517669  | -2.039924 | 0.130589  |
| C  | 5.516840  | -2.148247 | 1.141087  |
| C  | 5.229843  | -1.920716 | 2.471999  |
| H  | 3.685124  | -1.405936 | 3.918040  |
| H  | 1.905332  | -1.198436 | 2.199662  |
| C  | 2.139392  | -1.540451 | -0.460177 |
| C  | 4.808043  | -2.302857 | -1.250165 |
| H  | 6.534302  | -2.423339 | 0.856555  |
| H  | 6.016946  | -2.015523 | 3.225235  |
| C  | 3.774145  | -2.202235 | -2.162290 |
| C  | 2.460514  | -1.833462 | -1.774456 |

|   |           |           |           |
|---|-----------|-----------|-----------|
| H | 3.970988  | -2.418129 | -3.217904 |
| H | 1.690165  | -1.797807 | -2.551456 |
| C | 6.195257  | -2.696916 | -1.695906 |
| H | 6.943081  | -1.921133 | -1.456035 |
| H | 6.537727  | -3.626835 | -1.209907 |
| H | 6.224405  | -2.861812 | -2.783254 |
| C | -0.513752 | -3.847273 | -0.819320 |
| H | -1.596997 | -3.767331 | -0.982016 |
| C | 0.032603  | -3.083912 | 0.320490  |
| H | 1.015033  | -3.461551 | 0.624308  |
| H | -0.643789 | -3.103830 | 1.187012  |
| C | 0.178907  | -4.626045 | -1.671417 |
| H | 1.261092  | -4.757729 | -1.575026 |
| H | -0.317838 | -5.153697 | -2.491128 |

### 32-ts

B3LYP SCF energy: -2814.82838448 a.u.

B3LYP enthalpy: -2814.012190 a.u.

B3LYP free energy: -2814.149887 a.u.

M06-L SCF energy in solution: -2816.76163608 a.u.

M06-L enthalpy in solution: -2815.945442 a.u.

M06-L free energy in solution: -2816.083139 a.u.

Imaginary frequency: -370.2384 cm<sup>-1</sup>

### Cartesian coordinates

| ATOM | X         | Y         | Z         |
|------|-----------|-----------|-----------|
| P    | 0.792884  | 1.545349  | 0.060704  |
| P    | -2.323374 | -0.785711 | -0.115935 |
| O    | -2.032576 | 1.856882  | -1.041165 |
| C    | 0.122028  | 2.917792  | -1.023313 |
| C    | 0.923441  | 3.968110  | -1.507850 |
| C    | 0.411254  | 4.944885  | -2.366410 |
| C    | -0.923415 | 4.889751  | -2.774591 |
| C    | -1.743290 | 3.860240  | -2.309581 |
| C    | -1.225802 | 2.900079  | -1.435451 |
| C    | -3.401581 | 3.112705  | 0.547607  |
| C    | -2.879771 | 1.922766  | 0.036284  |
| C    | -3.220960 | 0.671261  | 0.587754  |
| C    | -4.125214 | 0.643771  | 1.658003  |
| C    | -4.663723 | 1.827956  | 2.173740  |
| C    | -4.295465 | 3.056656  | 1.621887  |
| C    | 2.605736  | 1.911527  | -0.029320 |
| C    | 3.273880  | 1.578686  | -1.221384 |
| C    | 4.640140  | 1.825888  | -1.363475 |
| C    | 5.366627  | 2.387879  | -0.308486 |
| C    | 4.716295  | 2.702073  | 0.887039  |
| C    | 3.343693  | 2.469475  | 1.026555  |
| C    | 0.347615  | 2.144293  | 1.760318  |



|    |           |           |           |
|----|-----------|-----------|-----------|
| C  | 0.039581  | 3.482393  | 2.057826  |
| C  | -0.265023 | 3.868723  | 3.366584  |
| C  | -0.259303 | 2.926464  | 4.399021  |
| C  | 0.050241  | 1.592958  | 4.115700  |
| C  | 0.344046  | 1.204328  | 2.805860  |
| C  | -2.954791 | -2.181066 | 0.926390  |
| C  | -2.407013 | -2.314917 | 2.217460  |
| C  | -2.785230 | -3.369437 | 3.050763  |
| C  | -3.701166 | -4.326225 | 2.599205  |
| C  | -4.234947 | -4.216256 | 1.313379  |
| C  | -3.867226 | -3.151547 | 0.482494  |
| C  | -3.187422 | -1.013741 | -1.740085 |
| C  | -2.434000 | -1.431250 | -2.848183 |
| C  | -3.041130 | -1.618340 | -4.094095 |
| C  | -4.409547 | -1.381449 | -4.248776 |
| C  | -5.167993 | -0.953607 | -3.153703 |
| C  | -4.561353 | -0.768826 | -1.908495 |
| H  | 1.971993  | 4.019190  | -1.212568 |
| H  | 1.063387  | 5.746267  | -2.722110 |
| H  | -1.326217 | 5.640985  | -3.458429 |
| H  | -4.404692 | -0.313973 | 2.101070  |
| H  | -5.366135 | 1.787464  | 3.009487  |
| H  | -4.706695 | 3.985589  | 2.025127  |
| H  | 2.723175  | 1.115360  | -2.042997 |
| H  | 5.141517  | 1.562549  | -2.297984 |
| H  | 6.438662  | 2.572683  | -0.415992 |
| H  | 5.277366  | 3.133579  | 1.720190  |
| H  | 2.851220  | 2.726422  | 1.965686  |
| H  | 0.037027  | 4.232595  | 1.264533  |
| H  | -0.506074 | 4.913588  | 3.579749  |
| H  | -0.497484 | 3.230434  | 5.421652  |
| H  | 0.058042  | 0.849206  | 4.916748  |
| H  | 0.579915  | 0.160297  | 2.586191  |
| H  | -1.673199 | -1.584773 | 2.570327  |
| H  | -2.354889 | -3.450860 | 4.052340  |
| H  | -3.990055 | -5.158649 | 3.245913  |
| H  | -4.943895 | -4.964277 | 0.948782  |
| H  | -4.295124 | -3.082785 | -0.519004 |
| H  | -1.359232 | -1.593034 | -2.731817 |
| H  | -2.439831 | -1.942688 | -4.947328 |
| H  | -4.884794 | -1.523337 | -5.222978 |
| H  | -6.237573 | -0.759238 | -3.270179 |
| H  | -5.162002 | -0.426811 | -1.062268 |
| H  | -3.112715 | 4.070539  | 0.113194  |
| H  | -2.785779 | 3.776709  | -2.623344 |
| Pd | 0.177293  | -0.809645 | -0.298923 |
| C  | 3.800185  | -1.854072 | 2.523453  |
| C  | 2.785676  | -1.819705 | 1.587256  |
| C  | 3.047947  | -1.805424 | 0.191411  |
| C  | 4.418998  | -1.852740 | -0.245209 |
| C  | 5.442296  | -1.883448 | 0.746440  |

|   |           |           |           |
|---|-----------|-----------|-----------|
| C | 5.146415  | -1.881031 | 2.095010  |
| H | 3.564565  | -1.866775 | 3.590889  |
| H | 1.741633  | -1.818431 | 1.908867  |
| C | 1.969740  | -1.759729 | -0.772160 |
| C | 4.726524  | -1.869543 | -1.648308 |
| H | 6.487001  | -1.908240 | 0.431354  |
| H | 5.954163  | -1.905793 | 2.831672  |
| C | 3.671089  | -1.839852 | -2.543219 |
| C | 2.321798  | -1.802837 | -2.122611 |
| H | 3.882871  | -1.860524 | -3.617493 |
| H | 1.540499  | -1.825276 | -2.887858 |
| C | 6.152608  | -1.929621 | -2.135810 |
| H | 6.744742  | -1.063110 | -1.792579 |
| H | 6.677574  | -2.831857 | -1.776247 |
| H | 6.190045  | -1.941940 | -3.235430 |
| C | 1.354647  | -4.242871 | -0.151851 |
| H | 2.133454  | -4.481393 | -0.885970 |
| C | 0.469623  | -3.091586 | -0.480893 |
| H | -0.354615 | -3.087399 | 0.249091  |
| H | 0.065075  | -3.198790 | -1.497520 |
| C | 1.250294  | -5.000825 | 0.948622  |
| H | 0.492342  | -4.800542 | 1.713645  |
| H | 1.924888  | -5.843187 | 1.125007  |

### 33

B3LYP SCF energy: -2814.86544890 a.u.

B3LYP enthalpy: -2814.047436 a.u.

B3LYP free energy: -2814.186503 a.u.

M06-L SCF energy in solution: -2816.79091892 a.u.

M06-L enthalpy in solution: -2815.972906 a.u.

M06-L free energy in solution: -2816.111973 a.u.

#### Cartesian coordinates

| ATOM | X         | Y         | Z         |
|------|-----------|-----------|-----------|
| P    | -3.126992 | 0.613178  | -0.498746 |
| P    | 1.573273  | -1.560512 | -0.005303 |
| O    | -1.104279 | -0.884926 | 1.038606  |
| C    | -3.424800 | -0.925836 | 0.501346  |
| C    | -4.660540 | -1.589534 | 0.577598  |
| C    | -4.811576 | -2.770681 | 1.309574  |
| C    | -3.713464 | -3.315527 | 1.978879  |
| C    | -2.469955 | -2.684382 | 1.913290  |
| C    | -2.329935 | -1.501280 | 1.180047  |
| C    | -0.569836 | -0.487895 | 3.360212  |
| C    | -0.186145 | -0.849580 | 2.064618  |
| C    | 1.160826  | -1.121524 | 1.750680  |
| C    | 2.106094  | -1.031484 | 2.784060  |
| C    | 1.729491  | -0.682194 | 4.083539  |

|   |           |           |           |
|---|-----------|-----------|-----------|
| C | 0.390354  | -0.406370 | 4.369257  |
| C | -4.771321 | 0.843911  | -1.331439 |
| C | -4.945393 | 0.200796  | -2.571540 |
| C | -6.133725 | 0.339573  | -3.292205 |
| C | -7.163754 | 1.145109  | -2.795259 |
| C | -6.997133 | 1.803471  | -1.573850 |
| C | -5.811996 | 1.653101  | -0.845622 |
| C | -3.153563 | 1.922430  | 0.816645  |
| C | -3.764288 | 1.769284  | 2.074021  |
| C | -3.739306 | 2.808524  | 3.009481  |
| C | -3.105928 | 4.017029  | 2.702150  |
| C | -2.492871 | 4.180150  | 1.456413  |
| C | -2.510567 | 3.137886  | 0.524756  |
| C | 3.381384  | -1.965450 | 0.019654  |
| C | 4.308725  | -0.943109 | 0.298985  |
| C | 5.681537  | -1.193454 | 0.245417  |
| C | 6.154738  | -2.460925 | -0.108467 |
| C | 5.243872  | -3.476118 | -0.408413 |
| C | 3.867789  | -3.233200 | -0.343547 |
| C | 0.778699  | -3.236947 | -0.107216 |
| C | 0.035289  | -3.605403 | -1.235175 |
| C | -0.553266 | -4.872597 | -1.319103 |
| C | -0.403274 | -5.786626 | -0.274536 |
| C | 0.335239  | -5.427904 | 0.859111  |
| C | 0.918001  | -4.161831 | 0.944770  |
| H | -5.522498 | -1.167406 | 0.057687  |
| H | -5.786566 | -3.261715 | 1.355612  |
| H | -3.816645 | -4.242447 | 2.548643  |
| H | 3.155087  | -1.242718 | 2.573735  |
| H | 2.486046  | -0.621685 | 4.869196  |
| H | 0.088547  | -0.118278 | 5.379322  |
| H | -4.136321 | -0.412760 | -2.979183 |
| H | -6.250712 | -0.172318 | -4.251083 |
| H | -8.090410 | 1.264768  | -3.362604 |
| H | -7.794851 | 2.440266  | -1.181893 |
| H | -5.698739 | 2.173930  | 0.107259  |
| H | -4.267640 | 0.832334  | 2.324204  |
| H | -4.219570 | 2.673849  | 3.982608  |
| H | -3.086233 | 4.828230  | 3.434643  |
| H | -1.986148 | 5.116854  | 1.210944  |
| H | -2.008847 | 3.266940  | -0.437895 |
| H | 3.959722  | 0.060494  | 0.545651  |
| H | 6.382254  | -0.384858 | 0.467335  |
| H | 7.229634  | -2.653294 | -0.157784 |
| H | 5.601648  | -4.468261 | -0.696137 |
| H | 3.175062  | -4.040369 | -0.584298 |
| H | -0.085405 | -2.889145 | -2.047117 |
| H | -1.133960 | -5.141758 | -2.205098 |
| H | -0.862538 | -6.776473 | -0.339421 |
| H | 0.457276  | -6.137587 | 1.681743  |
| H | 1.490357  | -3.893787 | 1.835919  |

|    |           |           |           |
|----|-----------|-----------|-----------|
| H  | -1.617848 | -0.261985 | 3.563982  |
| H  | -1.602147 | -3.111780 | 2.417002  |
| Pd | 1.140714  | 0.140490  | -1.599239 |
| C  | 5.178309  | 2.525998  | -2.082062 |
| C  | 3.980802  | 1.905294  | -1.789584 |
| C  | 3.146249  | 2.331029  | -0.714387 |
| C  | 3.594494  | 3.450480  | 0.081347  |
| C  | 4.838498  | 4.065580  | -0.246135 |
| C  | 5.613063  | 3.620613  | -1.298340 |
| H  | 5.791140  | 2.172491  | -2.915742 |
| H  | 3.643787  | 1.052983  | -2.384755 |
| C  | 1.899280  | 1.671540  | -0.423174 |
| C  | 2.784765  | 3.919593  | 1.169291  |
| H  | 5.186432  | 4.912806  | 0.347989  |
| H  | 6.561604  | 4.114479  | -1.526901 |
| C  | 1.588442  | 3.272471  | 1.412794  |
| C  | 1.153444  | 2.170620  | 0.632384  |
| H  | 0.951525  | 3.616194  | 2.234463  |
| H  | 0.191947  | 1.719542  | 0.888176  |
| C  | 3.219481  | 5.085964  | 2.023040  |
| H  | 4.181612  | 4.894159  | 2.529186  |
| H  | 3.353219  | 6.007414  | 1.430068  |
| H  | 2.472333  | 5.298273  | 2.802135  |
| C  | 0.712009  | 0.333943  | -3.766282 |
| H  | 1.590283  | 0.195796  | -4.409272 |
| C  | 0.553256  | 1.579852  | -3.105752 |
| H  | -0.433226 | 1.870681  | -2.729917 |
| H  | 1.230798  | 2.402153  | -3.344383 |
| C  | -0.025304 | -0.797316 | -3.408257 |
| H  | -1.016688 | -0.696237 | -2.955902 |
| H  | 0.206701  | -1.755345 | -3.879291 |

### 34-ts

B3LYP SCF energy: -2814.83412986 a.u.

B3LYP enthalpy: -2814.017447 a.u.

B3LYP free energy: -2814.157154 a.u.

M06-L SCF energy in solution: -2816.75665842 a.u.

M06-L enthalpy in solution: -2815.939976 a.u.

M06-L free energy in solution: -2816.079683 a.u.

Imaginary frequency: -326.9015 cm<sup>-1</sup>

### Cartesian coordinates

| ATOM | X         | Y         | Z         |
|------|-----------|-----------|-----------|
| P    | 3.166351  | -0.580674 | -0.350269 |
| P    | -1.792069 | 1.510879  | -0.032256 |
| O    | 1.045139  | 1.121555  | 0.856701  |
| C    | 3.369094  | 1.149670  | 0.300725  |
| C    | 4.568837  | 1.878255  | 0.224706  |

|   |           |           |           |    |           |           |           |
|---|-----------|-----------|-----------|----|-----------|-----------|-----------|
| C | 4.662331  | 3.185094  | 0.709974  | H  | -6.315284 | -0.413885 | 0.571334  |
| C | 3.541574  | 3.793697  | 1.281044  | H  | -7.522109 | 1.777731  | 0.550222  |
| C | 2.332875  | 3.101090  | 1.356818  | H  | -6.226467 | 3.893128  | 0.276722  |
| C | 2.247747  | 1.792531  | 0.866788  | H  | -3.767802 | 3.830574  | 0.049927  |
| C | 0.698908  | 0.921537  | 3.235398  | H  | -0.863774 | 2.838009  | -2.438728 |
| C | 0.200144  | 1.124838  | 1.943810  | H  | -0.173868 | 5.172584  | -2.982473 |
| C | -1.183898 | 1.268571  | 1.709298  | H  | -0.143739 | 6.912967  | -1.194538 |
| C | -2.044080 | 1.188700  | 2.816928  | H  | -0.817739 | 6.309312  | 1.131411  |
| C | -1.553733 | 0.988572  | 4.110240  | H  | -1.514727 | 3.992252  | 1.665156  |
| C | -0.178937 | 0.857223  | 4.318253  | H  | 1.773751  | 0.800355  | 3.379862  |
| C | 4.749515  | -0.818368 | -1.292534 | H  | 1.443558  | 3.574215  | 1.775197  |
| C | 4.729252  | -0.476097 | -2.657512 | Pd | -1.198051 | -0.124890 | -1.547886 |
| C | 5.863520  | -0.642993 | -3.455634 | C  | -4.878811 | -3.028606 | -2.224953 |
| C | 7.034177  | -1.176039 | -2.906441 | C  | -3.637623 | -2.448305 | -2.055705 |
| C | 7.062449  | -1.535797 | -1.556083 | C  | -2.823003 | -2.731258 | -0.922467 |
| C | 5.930431  | -1.356916 | -0.753835 | C  | -3.326147 | -3.654042 | 0.065550  |
| C | 3.465183  | -1.600413 | 1.173490  | C  | -4.615102 | -4.228009 | -0.138775 |
| C | 4.041748  | -1.112506 | 2.358662  | C  | -5.374041 | -3.927771 | -1.252283 |
| C | 4.219711  | -1.951781 | 3.463904  | H  | -5.479796 | -2.790914 | -3.106500 |
| C | 3.829292  | -3.292440 | 3.400795  | H  | -3.264389 | -1.738495 | -2.797035 |
| C | 3.255844  | -3.790741 | 2.226626  | C  | -1.529895 | -2.121817 | -0.751501 |
| C | 3.068459  | -2.949450 | 1.126637  | C  | -2.531626 | -3.969821 | 1.218983  |
| C | -3.628016 | 1.670002  | 0.188571  | H  | -5.010760 | -4.924944 | 0.602346  |
| C | -4.370805 | 0.481901  | 0.325686  | H  | -6.357822 | -4.386565 | -1.383238 |
| C | -5.759602 | 0.521187  | 0.465447  | C  | -1.288226 | -3.373912 | 1.336167  |
| C | -6.433847 | 1.746882  | 0.450952  | C  | -0.787299 | -2.476069 | 0.364916  |
| C | -5.708262 | 2.930650  | 0.298586  | H  | -0.665911 | -3.599735 | 2.207718  |
| C | -4.315137 | 2.894831  | 0.170688  | H  | 0.208855  | -2.051959 | 0.512316  |
| C | -1.249494 | 3.257658  | -0.359720 | C  | -3.030968 | -4.926637 | 2.272764  |
| C | -0.865240 | 3.608003  | -1.662462 | H  | -3.970290 | -4.577960 | 2.735958  |
| C | -0.472932 | 4.916593  | -1.962629 | H  | -3.235555 | -5.929043 | 1.858429  |
| C | -0.454552 | 5.891093  | -0.961503 | H  | -2.289419 | -5.044846 | 3.076494  |
| C | -0.830788 | 5.552078  | 0.342717  | C  | -0.488600 | -1.000935 | -3.457379 |
| C | -1.224124 | 4.244592  | 0.642296  | H  | -1.282862 | -1.122760 | -4.204562 |
| H | 5.448695  | 1.408036  | -0.218357 | C  | -0.381703 | -2.045791 | -2.433573 |
| H | 5.609615  | 3.725202  | 0.640713  | H  | 0.601519  | -2.145322 | -1.962947 |
| H | 3.600052  | 4.818071  | 1.657593  | C  | 0.245391  | 0.169593  | -3.488149 |
| H | -3.119525 | 1.291485  | 2.664528  | H  | 1.143418  | 0.296057  | -2.876891 |
| H | -2.248186 | 0.935326  | 4.951995  | H  | 0.076607  | 0.898099  | -4.284875 |
| H | 0.215892  | 0.692797  | 5.324015  | H  | -0.804723 | -3.007176 | -2.734558 |
| H | 3.810846  | -0.081251 | -3.101761 |    |           |           |           |
| H | 5.828577  | -0.367544 | -4.512977 |    |           |           |           |
| H | 7.919739  | -1.317280 | -3.531545 |    |           |           |           |
| H | 7.972003  | -1.958951 | -1.121118 |    |           |           |           |
| H | 5.969160  | -1.641707 | 0.299801  |    |           |           |           |
| H | 4.360465  | -0.069409 | 2.418560  |    |           |           |           |
| H | 4.669981  | -1.555086 | 4.377998  |    |           |           |           |
| H | 3.968533  | -3.946805 | 4.265225  |    |           |           |           |
| H | 2.943801  | -4.836789 | 2.168488  |    |           |           |           |
| H | 2.604152  | -3.345788 | 0.219225  |    |           |           |           |
| H | -3.859425 | -0.482529 | 0.312197  |    |           |           |           |

### 35

B3LYP SCF energy: -5828.72907373 a.u.

B3LYP enthalpy: -5827.834438 a.u.

B3LYP free energy: -5827.997154 a.u.

M06-L SCF energy in solution: -5831.03284123 a.u.

M06-L enthalpy in solution: -5830.138205 a.u.

M06-L free energy in solution: -5830.300921 a.u.

## Cartesian coordinates

| ATOM | X         | Y         | Z         |
|------|-----------|-----------|-----------|
| P    | -1.875890 | 1.577205  | -0.050004 |
| P    | 3.201007  | -0.297609 | 0.448007  |
| O    | 1.035781  | 1.721272  | 0.756214  |
| C    | -1.160407 | 2.289098  | 1.507861  |
| C    | -1.964950 | 2.868466  | 2.506019  |
| C    | -1.410482 | 3.440276  | 3.652180  |
| C    | -0.023638 | 3.437550  | 3.826123  |
| C    | 0.799124  | 2.875503  | 2.852202  |
| C    | 0.238130  | 2.313778  | 1.696553  |
| C    | 2.204095  | 3.696576  | 0.007776  |
| C    | 2.189844  | 2.329214  | 0.304701  |
| C    | 3.320780  | 1.519961  | 0.087392  |
| C    | 4.470319  | 2.136097  | -0.437008 |
| C    | 4.500710  | 3.502155  | -0.725044 |
| C    | 3.362553  | 4.281902  | -0.502293 |
| C    | -3.690045 | 1.435404  | 0.325497  |
| C    | -4.132257 | 0.719049  | 1.454146  |
| C    | -5.495992 | 0.570980  | 1.713474  |
| C    | -6.444647 | 1.119891  | 0.845500  |
| C    | -6.017725 | 1.826344  | -0.280312 |
| C    | -4.652370 | 1.987843  | -0.537107 |
| C    | -1.834324 | 3.014401  | -1.216098 |
| C    | -1.711111 | 4.335908  | -0.755196 |
| C    | -1.751639 | 5.406804  | -1.653272 |
| C    | -1.923547 | 5.171415  | -3.020054 |
| C    | -2.051281 | 3.859986  | -3.485594 |
| C    | -1.999420 | 2.786679  | -2.592274 |
| C    | 4.631595  | -0.955818 | -0.532744 |
| C    | 4.478409  | -0.991560 | -1.933940 |
| C    | 5.473821  | -1.541637 | -2.743736 |
| C    | 6.630539  | -2.083097 | -2.170368 |
| C    | 6.786054  | -2.062720 | -0.782538 |
| C    | 5.795834  | -1.500274 | 0.032090  |
| C    | 3.814379  | -0.391617 | 2.198845  |
| C    | 3.456655  | -1.533946 | 2.938231  |
| C    | 3.866205  | -1.687245 | 4.265929  |
| C    | 4.626057  | -0.689462 | 4.883817  |
| C    | 4.977163  | 0.457370  | 4.164871  |
| C    | 4.577035  | 0.604935  | 2.832852  |
| H    | -3.047709 | 2.881292  | 2.379841  |
| H    | -2.062950 | 3.884762  | 4.407100  |
| H    | 0.421854  | 3.869886  | 4.725621  |
| H    | 5.357757  | 1.528956  | -0.626069 |
| H    | 5.409248  | 3.953816  | -1.130413 |
| H    | 3.367460  | 5.348396  | -0.741078 |
| H    | -3.410482 | 0.275229  | 2.139935  |
| H    | -5.816067 | 0.011861  | 2.596025  |
| H    | -7.511822 | 0.996514  | 1.047105  |
| H    | -6.748330 | 2.263289  | -0.965960 |
| H    | -4.343256 | 2.553925  | -1.416185 |
| H    | -1.588987 | 4.538588  | 0.310061  |
| H    | -1.651269 | 6.429168  | -1.279501 |
| H    | -1.953685 | 6.008970  | -3.721880 |
| H    | -2.174428 | 3.664667  | -4.553642 |
| H    | -2.067313 | 1.766587  | -2.970613 |
| H    | 3.575566  | -0.574867 | -2.393229 |
| H    | 5.342410  | -1.552118 | -3.829048 |
| H    | 7.406245  | -2.520180 | -2.804607 |
| H    | 7.686246  | -2.482899 | -0.325545 |
| H    | 5.936093  | -1.486850 | 1.114978  |
| H    | 2.845301  | -2.310454 | 2.469662  |
| H    | 3.581487  | -2.584621 | 4.821615  |
| H    | 4.939935  | -0.802893 | 5.924801  |
| H    | 5.569747  | 1.242575  | 4.642385  |
| H    | 4.863297  | 1.503564  | 2.281824  |
| H    | 1.300127  | 4.289056  | 0.156976  |
| H    | 1.883199  | 2.857986  | 2.976466  |
| Pd   | -0.817709 | -0.405792 | -0.748074 |
| C    | -4.695712 | -3.066493 | -0.480573 |
| C    | -3.573657 | -2.267130 | -0.402220 |
| C    | -2.800815 | -2.166284 | 0.789576  |
| C    | -3.232429 | -2.916933 | 1.944371  |
| C    | -4.389661 | -3.740815 | 1.824303  |
| C    | -5.104088 | -3.818427 | 0.645874  |
| H    | -5.270685 | -3.116413 | -1.408914 |
| H    | -3.257699 | -1.673135 | -1.261866 |
| C    | -1.632086 | -1.333799 | 0.864229  |
| C    | -2.503059 | -2.813333 | 3.177062  |
| H    | -4.721109 | -4.322702 | 2.686235  |
| H    | -5.989252 | -4.457209 | 0.584238  |
| C    | -1.396843 | -1.985905 | 3.212277  |
| C    | -0.963389 | -1.257106 | 2.074176  |
| H    | -0.829399 | -1.888862 | 4.143226  |
| H    | -0.073914 | -0.629544 | 2.174606  |
| Br   | 0.525730  | 0.585977  | -2.759464 |
| C    | -2.925407 | -3.587270 | 4.401713  |
| H    | -3.951336 | -3.333988 | 4.719657  |
| H    | -2.908251 | -4.676571 | 4.225513  |
| H    | -2.254167 | -3.377435 | 5.247297  |
| N    | 0.516757  | -3.052021 | -0.270662 |
| N    | 0.677654  | -3.683285 | 0.644973  |
| C    | 0.265374  | -2.285844 | -1.338580 |
| Si   | -0.422720 | -3.277197 | -2.865246 |
| C    | -1.206387 | -4.859687 | -2.196762 |
| H    | -2.055909 | -4.637439 | -1.531127 |
| H    | -1.588872 | -5.465222 | -3.035601 |
| H    | -0.486957 | -5.484239 | -1.642064 |
| C    | -1.657966 | -2.285072 | -3.872972 |
| H    | -2.586416 | -2.090749 | -3.316578 |

|   |           |           |           |
|---|-----------|-----------|-----------|
| H | -1.217890 | -1.319997 | -4.165142 |
| H | -1.916994 | -2.853110 | -4.783147 |
| C | 1.085679  | -3.671605 | -3.930243 |
| H | 1.844242  | -4.246333 | -3.374314 |
| H | 0.794399  | -4.261186 | -4.816031 |
| H | 1.552987  | -2.737478 | -4.281860 |
| H | 1.185713  | -1.728622 | -1.578851 |

### 36-ts

B3LYP SCF energy: -5828.69933304 a.u.  
 B3LYP enthalpy: -5827.806848 a.u.  
 B3LYP free energy: -5827.969889 a.u.  
 M06-L SCF energy in solution: -5830.99949280 a.u.  
 M06-L enthalpy in solution: -5830.107008 a.u.  
 M06-L free energy in solution: -5830.270049 a.u.  
 Imaginary frequency: -444.1186 cm<sup>-1</sup>

### Cartesian coordinates

| ATOM | X         | Y         | Z         |
|------|-----------|-----------|-----------|
| P    | -1.848329 | 1.608566  | -0.176195 |
| P    | 3.177289  | -0.264822 | 0.527554  |
| O    | 1.048917  | 1.816681  | 0.551946  |
| C    | -1.120458 | 2.448490  | 1.310927  |
| C    | -1.903734 | 3.098912  | 2.280127  |
| C    | -1.323285 | 3.759589  | 3.364933  |
| C    | 0.067293  | 3.777319  | 3.501997  |
| C    | 0.870154  | 3.142891  | 2.555313  |
| C    | 0.281789  | 2.488587  | 1.464639  |
| C    | 2.273302  | 3.673203  | -0.380240 |
| C    | 2.225586  | 2.346444  | 0.061951  |
| C    | 3.340948  | 1.494560  | -0.049004 |
| C    | 4.506908  | 2.023216  | -0.630073 |
| C    | 4.569447  | 3.348428  | -1.066475 |
| C    | 3.449107  | 4.174227  | -0.938404 |
| C    | -3.666242 | 1.553346  | 0.196253  |
| C    | -4.132390 | 0.913034  | 1.360516  |
| C    | -5.501161 | 0.811220  | 1.616544  |
| C    | -6.430470 | 1.333293  | 0.711857  |
| C    | -5.979506 | 1.965198  | -0.448618 |
| C    | -4.609052 | 2.078391  | -0.704126 |
| C    | -1.757282 | 2.936308  | -1.465378 |
| C    | -1.677007 | 4.297505  | -1.123101 |
| C    | -1.670631 | 5.279782  | -2.117484 |
| C    | -1.749963 | 4.916284  | -3.465327 |
| C    | -1.835148 | 3.565992  | -3.813447 |
| C    | -1.834168 | 2.580692  | -2.821434 |
| C    | 4.605240  | -1.066418 | -0.343669 |
| C    | 4.446383  | -1.309776 | -1.723392 |

|    |           |           |           |
|----|-----------|-----------|-----------|
| C  | 5.437389  | -1.975437 | -2.447266 |
| C  | 6.595792  | -2.428202 | -1.804704 |
| C  | 6.756696  | -2.203859 | -0.435540 |
| C  | 5.770676  | -1.525299 | 0.290998  |
| C  | 3.771718  | -0.149117 | 2.284502  |
| C  | 3.331082  | -1.149141 | 3.170109  |
| C  | 3.721600  | -1.143152 | 4.512442  |
| C  | 4.547407  | -0.124117 | 4.996040  |
| C  | 4.982887  | 0.883713  | 4.129509  |
| C  | 4.600075  | 0.871053  | 2.784471  |
| H  | -2.989554 | 3.096870  | 2.180299  |
| H  | -1.958791 | 4.258228  | 4.100272  |
| H  | 0.532442  | 4.281520  | 4.352849  |
| H  | 5.381668  | 1.379915  | -0.744209 |
| H  | 5.490323  | 3.732422  | -1.511894 |
| H  | 3.481578  | 5.208629  | -1.289682 |
| H  | -3.426159 | 0.492489  | 2.076806  |
| H  | -5.840255 | 0.308858  | 2.525724  |
| H  | -7.501631 | 1.246482  | 0.911462  |
| H  | -6.695344 | 2.379437  | -1.163386 |
| H  | -4.279573 | 2.583088  | -1.613026 |
| H  | -1.624853 | 4.598256  | -0.075151 |
| H  | -1.605795 | 6.334000  | -1.835434 |
| H  | -1.742452 | 5.684995  | -4.242514 |
| H  | -1.888963 | 3.270679  | -4.864199 |
| H  | -1.873090 | 1.529002  | -3.106770 |
| H  | 3.539983  | -0.968456 | -2.234523 |
| H  | 5.300133  | -2.147964 | -3.518081 |
| H  | 7.367885  | -2.956449 | -2.370263 |
| H  | 7.657568  | -2.555015 | 0.075202  |
| H  | 5.915211  | -1.354069 | 1.359837  |
| H  | 2.668122  | -1.938005 | 2.803277  |
| H  | 3.371410  | -1.931635 | 5.183865  |
| H  | 4.847718  | -0.112322 | 6.047098  |
| H  | 5.627511  | 1.684675  | 4.501837  |
| H  | 4.951159  | 1.661617  | 2.117290  |
| H  | 1.381154  | 4.296864  | -0.303522 |
| H  | 1.956861  | 3.138419  | 2.654909  |
| Pd | -0.834466 | -0.520661 | -0.709073 |
| C  | -4.699771 | -3.140763 | -0.123047 |
| C  | -3.566380 | -2.353962 | -0.145247 |
| C  | -2.810270 | -2.087058 | 1.031754  |
| C  | -3.267965 | -2.656236 | 2.276980  |
| C  | -4.440591 | -3.467213 | 2.261948  |
| C  | -5.139832 | -3.707077 | 1.096373  |
| H  | -5.260166 | -3.322249 | -1.043888 |
| H  | -3.224456 | -1.901253 | -1.077991 |
| C  | -1.628793 | -1.269792 | 1.001148  |
| C  | -2.545345 | -2.393799 | 3.489815  |
| H  | -4.794784 | -3.909480 | 3.194919  |
| H  | -6.036087 | -4.332997 | 1.115728  |

|    |           |           |           |
|----|-----------|-----------|-----------|
| C  | -1.418001 | -1.596478 | 3.417980  |
| C  | -0.961254 | -1.043796 | 2.193529  |
| H  | -0.854459 | -1.382818 | 4.331862  |
| H  | -0.058263 | -0.428252 | 2.208652  |
| Br | 0.538919  | 0.081930  | -2.859814 |
| C  | -2.996282 | -2.973055 | 4.808365  |
| H  | -4.018249 | -2.652481 | 5.074202  |
| H  | -3.004959 | -4.076523 | 4.792325  |
| H  | -2.327395 | -2.658464 | 5.622789  |
| N  | 0.218938  | -3.437501 | 0.076295  |
| N  | 0.256111  | -3.891932 | 1.082308  |
| C  | 0.124109  | -2.225507 | -1.320456 |
| Si | -0.405198 | -3.361269 | -2.809490 |
| C  | -1.043487 | -5.013605 | -2.130080 |
| H  | -1.882088 | -4.870468 | -1.429058 |
| H  | -1.414662 | -5.626909 | -2.968717 |
| H  | -0.260126 | -5.596611 | -1.619320 |
| C  | -1.787251 | -2.588610 | -3.831016 |
| H  | -2.687492 | -2.403887 | -3.224841 |
| H  | -1.465742 | -1.634931 | -4.272675 |
| H  | -2.064399 | -3.281498 | -4.643939 |
| C  | 1.113827  | -3.678712 | -3.886821 |
| H  | 1.930160  | -4.142143 | -3.308265 |
| H  | 0.863613  | -4.356054 | -4.720983 |
| H  | 1.487448  | -2.732530 | -4.307696 |
| H  | 1.210604  | -2.084911 | -1.233667 |

### 37

B3LYP SCF energy: -5719.29678501 a.u.  
 B3LYP enthalpy: -5718.414236 a.u.  
 B3LYP free energy: -5718.571190 a.u.  
 M06-L SCF energy in solution: -5721.48389234 a.u.  
 M06-L enthalpy in solution: -5720.601343 a.u.  
 M06-L free energy in solution: -5720.758297 a.u.

#### Cartesian coordinates

| ATOM | X         | Y         | Z         |
|------|-----------|-----------|-----------|
| P    | -1.267045 | -1.604539 | 0.079969  |
| P    | 3.892870  | 0.609569  | -0.119897 |
| O    | 1.800770  | -1.538601 | 0.102250  |
| C    | -0.077727 | -2.683512 | -0.873021 |
| C    | -0.525762 | -3.673608 | -1.766980 |
| C    | 0.361580  | -4.461418 | -2.502292 |
| C    | 1.737143  | -4.270413 | -2.360025 |
| C    | 2.212794  | -3.301080 | -1.479337 |
| C    | 1.319049  | -2.515654 | -0.739882 |
| C    | 2.877141  | -2.955864 | 1.728886  |
| C    | 2.882512  | -1.811253 | 0.923931  |

|   |           |           |           |
|---|-----------|-----------|-----------|
| C | 3.953268  | -0.894445 | 0.969778  |
| C | 4.995008  | -1.154566 | 1.878296  |
| C | 4.991286  | -2.289757 | 2.691894  |
| C | 3.931300  | -3.196009 | 2.610283  |
| C | -2.901490 | -2.423787 | -0.213580 |
| C | -3.479810 | -2.290960 | -1.490393 |
| C | -4.731560 | -2.842203 | -1.768401 |
| C | -5.441601 | -3.513389 | -0.767898 |
| C | -4.891426 | -3.624564 | 0.510094  |
| C | -3.630767 | -3.084480 | 0.787138  |
| C | -0.846492 | -2.022256 | 1.831441  |
| C | -0.706073 | -3.351763 | 2.268807  |
| C | -0.410269 | -3.630729 | 3.605321  |
| C | -0.235440 | -2.585230 | 4.518965  |
| C | -0.355244 | -1.261450 | 4.089936  |
| C | -0.660901 | -0.981581 | 2.753772  |
| C | 5.358228  | 1.578457  | 0.476352  |
| C | 5.143488  | 2.417149  | 1.587230  |
| C | 6.168498  | 3.223416  | 2.085998  |
| C | 7.423132  | 3.225367  | 1.466580  |
| C | 7.642985  | 2.413641  | 0.350903  |
| C | 6.620304  | 1.594165  | -0.140097 |
| C | 4.471814  | -0.082049 | -1.740969 |
| C | 3.968633  | 0.519167  | -2.907368 |
| C | 4.359104  | 0.064443  | -4.170929 |
| C | 5.251493  | -1.004852 | -4.286017 |
| C | 5.752908  | -1.617665 | -3.132464 |
| C | 5.365212  | -1.160851 | -1.869270 |
| H | -1.595670 | -3.843136 | -1.882937 |
| H | -0.026697 | -5.223040 | -3.182440 |
| H | 2.445151  | -4.870735 | -2.936700 |
| H | 5.829980  | -0.454355 | 1.941538  |
| H | 5.818590  | -2.466399 | 3.383544  |
| H | 3.914987  | -4.088504 | 3.240864  |
| H | -2.954639 | -1.739417 | -2.272325 |
| H | -5.160740 | -2.729032 | -2.766872 |
| H | -6.426699 | -3.935813 | -0.981921 |
| H | -5.445635 | -4.130533 | 1.304778  |
| H | -3.227968 | -3.174007 | 1.796068  |
| H | -0.830309 | -4.175035 | 1.560682  |
| H | -0.312117 | -4.668627 | 3.934582  |
| H | 0.000007  | -2.804420 | 5.563624  |
| H | -0.208593 | -0.439560 | 4.795068  |
| H | -0.745480 | 0.055607  | 2.418930  |
| H | 4.158026  | 2.441966  | 2.062057  |
| H | 5.983209  | 3.862938  | 2.953083  |
| H | 8.223640  | 3.864353  | 1.848349  |
| H | 8.617923  | 2.415465  | -0.144054 |
| H | 6.809802  | 0.965871  | -1.012508 |
| H | 3.256330  | 1.344398  | -2.821905 |
| H | 3.957131  | 0.542874  | -5.067827 |

|    |           |           |           |
|----|-----------|-----------|-----------|
| H  | 5.553438  | -1.364310 | -5.273269 |
| H  | 6.450452  | -2.455570 | -3.216662 |
| H  | 5.762599  | -1.647076 | -0.974704 |
| H  | 2.035149  | -3.645810 | 1.669067  |
| H  | 3.284096  | -3.131780 | -1.365106 |
| Pd | -1.359159 | 0.791191  | -0.393536 |
| C  | -5.079006 | 0.645433  | 2.508410  |
| C  | -4.084010 | 0.724715  | 1.555549  |
| C  | -4.373032 | 0.866255  | 0.168005  |
| C  | -5.759794 | 0.930660  | -0.229904 |
| C  | -6.761125 | 0.840966  | 0.780497  |
| C  | -6.435861 | 0.702647  | 2.114542  |
| H  | -4.819591 | 0.539017  | 3.565048  |
| H  | -3.034845 | 0.683474  | 1.853220  |
| C  | -3.333827 | 0.948285  | -0.820032 |
| C  | -6.100036 | 1.089511  | -1.615235 |
| H  | -7.812833 | 0.886291  | 0.492017  |
| H  | -7.226842 | 0.639893  | 2.866831  |
| C  | -5.069692 | 1.186253  | -2.531002 |
| C  | -3.707216 | 1.125685  | -2.142585 |
| H  | -5.307878 | 1.319823  | -3.591353 |
| H  | -2.946877 | 1.218042  | -2.923045 |
| Br | 0.865881  | 2.322587  | -0.506073 |
| C  | -7.539224 | 1.162787  | -2.063397 |
| H  | -8.102817 | 0.252243  | -1.796274 |
| H  | -8.073011 | 2.011993  | -1.602988 |
| H  | -7.603118 | 1.284293  | -3.154835 |
| C  | -1.084123 | 2.783626  | -0.748089 |
| Si | -1.628589 | 4.213657  | 0.376345  |
| C  | -3.437131 | 4.611321  | -0.001570 |
| H  | -4.095607 | 3.764864  | 0.244687  |
| H  | -3.765439 | 5.485977  | 0.585423  |
| H  | -3.579348 | 4.849858  | -1.068311 |
| C  | -1.415438 | 3.763453  | 2.200272  |
| H  | -2.083678 | 2.935582  | 2.484783  |
| H  | -0.377950 | 3.461515  | 2.417228  |
| H  | -1.656650 | 4.627469  | 2.842133  |
| C  | -0.576427 | 5.746693  | -0.001914 |
| H  | -0.673089 | 6.046501  | -1.058790 |
| H  | -0.893536 | 6.602168  | 0.618753  |
| H  | 0.491193  | 5.560870  | 0.198308  |
| H  | -1.200102 | 3.008401  | -1.819958 |

### 38-ts

B3LYP SCF energy: -5719.28388502 a.u.  
 B3LYP enthalpy: -5718.402418 a.u.  
 B3LYP free energy: -5718.559811 a.u.  
 M06-L SCF energy in solution: -5721.46852207  
 a.u.

M06-L enthalpy in solution: -5720.587055 a.u.  
 M06-L free energy in solution: -5720.744448 a.u.  
 Imaginary frequency: -367.3331 cm<sup>-1</sup>

### Cartesian coordinates

| ATOM | X         | Y         | Z         |
|------|-----------|-----------|-----------|
| P    | -1.864457 | 1.823360  | -0.100258 |
| P    | 3.166950  | -0.314705 | 0.389743  |
| O    | 1.037531  | 1.790283  | 0.577880  |
| C    | -1.083556 | 2.394206  | 1.486185  |
| C    | -1.820534 | 2.886275  | 2.575851  |
| C    | -1.190349 | 3.319892  | 3.745436  |
| C    | 0.201888  | 3.263623  | 3.844291  |
| C    | 0.958993  | 2.771513  | 2.780555  |
| C    | 0.321019  | 2.339331  | 1.611941  |
| C    | 2.299184  | 3.703617  | -0.159962 |
| C    | 2.228069  | 2.339651  | 0.148650  |
| C    | 3.331625  | 1.485726  | -0.045915 |
| C    | 4.502200  | 2.048408  | -0.585497 |
| C    | 4.583996  | 3.407338  | -0.896042 |
| C    | 3.479762  | 4.236394  | -0.676867 |
| C    | -3.676717 | 1.977454  | 0.249479  |
| C    | -4.265089 | 1.020983  | 1.098259  |
| C    | -5.633892 | 1.056032  | 1.370347  |
| C    | -6.442933 | 2.034747  | 0.783041  |
| C    | -5.872153 | 2.977709  | -0.074618 |
| C    | -4.498064 | 2.952829  | -0.338929 |
| C    | -1.517762 | 3.253342  | -1.226562 |
| C    | -1.494295 | 4.583321  | -0.768798 |
| C    | -1.247212 | 5.633998  | -1.656131 |
| C    | -1.018406 | 5.369399  | -3.011355 |
| C    | -1.035750 | 4.051245  | -3.473370 |
| C    | -1.280890 | 2.997629  | -2.585987 |
| C    | 4.555758  | -1.058308 | -0.591110 |
| C    | 4.278811  | -1.365611 | -1.937605 |
| C    | 5.250309  | -1.961684 | -2.744897 |
| C    | 6.506377  | -2.279743 | -2.216795 |
| C    | 6.786070  | -1.992361 | -0.878248 |
| C    | 5.819338  | -1.382959 | -0.070322 |
| C    | 3.835974  | -0.353890 | 2.122975  |
| C    | 3.615959  | -1.534063 | 2.858223  |
| C    | 4.065331  | -1.654868 | 4.175291  |
| C    | 4.726695  | -0.587059 | 4.791077  |
| C    | 4.941199  | 0.595088  | 4.077302  |
| C    | 4.503105  | 0.710346  | 2.753061  |
| H    | -2.908231 | 2.936841  | 2.506261  |
| H    | -1.789086 | 3.701044  | 4.575923  |
| H    | 0.705142  | 3.593716  | 4.756562  |
| H    | 5.366426  | 1.404887  | -0.761833 |
| H    | 5.507874  | 3.816568  | -1.311839 |
| H    | 3.528682  | 5.299703  | -0.924902 |

|    |           |           |           |
|----|-----------|-----------|-----------|
| H  | -3.649214 | 0.237226  | 1.544193  |
| H  | -6.070451 | 0.304556  | 2.032888  |
| H  | -7.516264 | 2.057087  | 0.988862  |
| H  | -6.497069 | 3.741731  | -0.544588 |
| H  | -4.070544 | 3.698210  | -1.011254 |
| H  | -1.671133 | 4.800484  | 0.287344  |
| H  | -1.233137 | 6.663451  | -1.288153 |
| H  | -0.822144 | 6.191757  | -3.704390 |
| H  | -0.848460 | 3.835680  | -4.528303 |
| H  | -1.270639 | 1.967419  | -2.950582 |
| H  | 3.293420  | -1.137259 | -2.355842 |
| H  | 5.019861  | -2.188919 | -3.789092 |
| H  | 7.262954  | -2.755530 | -2.846339 |
| H  | 7.764072  | -2.240838 | -0.456984 |
| H  | 6.053961  | -1.161035 | 0.972942  |
| H  | 3.085807  | -2.369172 | 2.390502  |
| H  | 3.890745  | -2.583037 | 4.726030  |
| H  | 5.070620  | -0.675822 | 5.824848  |
| H  | 5.458325  | 1.434217  | 4.550770  |
| H  | 4.689495  | 1.636421  | 2.204754  |
| H  | 1.418558  | 4.331287  | -0.013422 |
| H  | 2.045705  | 2.703444  | 2.852493  |
| Pd | -1.113325 | -0.323702 | -0.824823 |
| C  | -5.026087 | -2.799671 | -0.051461 |
| C  | -3.776592 | -2.232802 | -0.207062 |
| C  | -2.753550 | -2.395386 | 0.766979  |
| C  | -3.055944 | -3.156925 | 1.952295  |
| C  | -4.355417 | -3.726942 | 2.081125  |
| C  | -5.317334 | -3.559121 | 1.104572  |
| H  | -5.790797 | -2.657007 | -0.819145 |
| H  | -3.547397 | -1.629054 | -1.087807 |
| C  | -1.449367 | -1.802520 | 0.604408  |
| C  | -2.054907 | -3.320884 | 2.971690  |
| H  | -4.597217 | -4.309618 | 2.971549  |
| H  | -6.305577 | -4.010050 | 1.227665  |
| C  | -0.816621 | -2.736493 | 2.778628  |
| C  | -0.510243 | -1.999481 | 1.609845  |
| H  | -0.045719 | -2.846859 | 3.547141  |
| H  | 0.488387  | -1.568004 | 1.508503  |
| Br | 0.296809  | -0.643096 | -3.051682 |
| C  | -2.342965 | -4.111553 | 4.222721  |
| H  | -3.187832 | -3.686424 | 4.790817  |
| H  | -2.608523 | -5.157696 | 3.993795  |
| H  | -1.467487 | -4.127059 | 4.887747  |
| C  | -0.326991 | -2.099365 | -1.212348 |
| Si | -0.761188 | -3.709400 | -2.160345 |
| C  | -1.151050 | -5.066902 | -0.896400 |
| H  | -2.094729 | -4.883422 | -0.362711 |
| H  | -1.235445 | -6.035433 | -1.418757 |
| H  | -0.348773 | -5.159160 | -0.146473 |
| C  | -2.204947 | -3.489993 | -3.353847 |

|   |           |           |           |
|---|-----------|-----------|-----------|
| H | -2.007457 | -2.665801 | -4.056385 |
| H | -2.345871 | -4.414483 | -3.939102 |
| H | -3.147090 | -3.280409 | -2.825845 |
| C | 0.777773  | -4.264427 | -3.114048 |
| H | 1.656304  | -4.337110 | -2.451740 |
| H | 0.607873  | -5.261103 | -3.556552 |
| H | 1.023230  | -3.562269 | -3.924777 |
| H | 0.683581  | -2.137513 | -0.774845 |

### 39

B3LYP SCF energy: -5719.36365844 a.u.

B3LYP enthalpy: -5718.478914 a.u.

B3LYP free energy: -5718.633405 a.u.

M06-L SCF energy in solution: -5721.55546019 a.u.

M06-L enthalpy in solution: -5720.670716 a.u.

M06-L free energy in solution: -5720.825207 a.u.

### Cartesian coordinates

| ATOM | X         | Y         | Z         |
|------|-----------|-----------|-----------|
| P    | -1.492003 | 1.815690  | -0.171844 |
| P    | 3.277438  | -0.694025 | 0.138898  |
| O    | 1.436067  | 1.718528  | -0.302322 |
| C    | -0.315604 | 2.596678  | 1.021343  |
| C    | -0.718968 | 3.260258  | 2.190501  |
| C    | 0.213130  | 3.814864  | 3.072859  |
| C    | 1.576876  | 3.706417  | 2.793522  |
| C    | 2.010481  | 3.030277  | 1.651510  |
| C    | 1.073302  | 2.464385  | 0.778359  |
| C    | 2.887175  | 3.024352  | -1.685677 |
| C    | 2.659887  | 1.865436  | -0.932828 |
| C    | 3.604929  | 0.824301  | -0.888042 |
| C    | 4.775749  | 0.979554  | -1.654593 |
| C    | 5.013483  | 2.130581  | -2.405978 |
| C    | 4.066469  | 3.159881  | -2.415663 |
| C    | -3.176497 | 2.464617  | 0.269642  |
| C    | -4.263442 | 1.577443  | 0.274415  |
| C    | -5.564677 | 2.040492  | 0.499770  |
| C    | -5.796564 | 3.398363  | 0.725235  |
| C    | -4.723010 | 4.295861  | 0.704266  |
| C    | -3.426503 | 3.835753  | 0.467046  |
| C    | -1.224902 | 2.774429  | -1.736080 |
| C    | -0.679083 | 4.068868  | -1.726079 |
| C    | -0.598349 | 4.813119  | -2.907021 |
| C    | -1.063423 | 4.273251  | -4.109757 |
| C    | -1.609610 | 2.987334  | -4.124635 |
| C    | -1.689823 | 2.238996  | -2.946710 |
| C    | 4.103230  | -1.996765 | -0.896075 |
| C    | 3.350931  | -2.506014 | -1.972647 |



|    |           |           |           |
|----|-----------|-----------|-----------|
| C  | 3.876978  | -3.507852 | -2.791687 |
| C  | 5.149764  | -4.031635 | -2.539147 |
| C  | 5.896744  | -3.542247 | -1.464539 |
| C  | 5.379599  | -2.529186 | -0.648861 |
| C  | 4.480838  | -0.478365 | 1.540066  |
| C  | 4.425599  | -1.442484 | 2.566150  |
| C  | 5.252647  | -1.351432 | 3.687076  |
| C  | 6.139450  | -0.277148 | 3.819685  |
| C  | 6.193474  | 0.696110  | 2.819497  |
| C  | 5.375002  | 0.595444  | 1.687983  |
| H  | -1.781973 | 3.352400  | 2.416353  |
| H  | -0.129647 | 4.329254  | 3.973244  |
| H  | 2.315543  | 4.136461  | 3.474545  |
| H  | 5.513643  | 0.174346  | -1.659211 |
| H  | 5.932736  | 2.220535  | -2.989901 |
| H  | 4.234879  | 4.061537  | -3.009912 |
| H  | -4.092993 | 0.517530  | 0.078227  |
| H  | -6.397122 | 1.332341  | 0.492162  |
| H  | -6.811778 | 3.761542  | 0.904661  |
| H  | -4.897414 | 5.363365  | 0.861943  |
| H  | -2.608383 | 4.557035  | 0.422749  |
| H  | -0.313882 | 4.505943  | -0.793854 |
| H  | -0.171369 | 5.819469  | -2.884667 |
| H  | -0.998376 | 4.854053  | -5.033562 |
| H  | -1.967974 | 2.553322  | -5.061406 |
| H  | -2.092611 | 1.225930  | -2.974884 |
| H  | 2.347796  | -2.113182 | -2.170404 |
| H  | 3.282775  | -3.886325 | -3.627802 |
| H  | 5.556280  | -4.821827 | -3.176099 |
| H  | 6.891506  | -3.947031 | -1.258308 |
| H  | 5.977253  | -2.155151 | 0.185287  |
| H  | 3.723627  | -2.277628 | 2.484399  |
| H  | 5.197715  | -2.117098 | 4.465593  |
| H  | 6.781552  | -0.198514 | 4.700801  |
| H  | 6.881812  | 1.540573  | 2.913794  |
| H  | 5.443410  | 1.360343  | 0.912037  |
| H  | 2.116765  | 3.795637  | -1.713544 |
| H  | 3.075184  | 2.916350  | 1.444197  |
| Pd | -1.339562 | -0.519777 | -0.155009 |
| C  | -6.118616 | -2.755287 | 0.466330  |
| C  | -4.914451 | -2.247126 | 0.927383  |
| C  | -3.674542 | -2.723611 | 0.439937  |
| C  | -3.674008 | -3.780438 | -0.527475 |
| C  | -4.923177 | -4.274082 | -0.984903 |
| C  | -6.121640 | -3.773067 | -0.505006 |
| H  | -7.061969 | -2.371196 | 0.862633  |
| H  | -4.922555 | -1.471782 | 1.694848  |
| C  | -2.403798 | -2.193943 | 0.936611  |
| C  | -2.423820 | -4.333470 | -1.013734 |
| H  | -4.941836 | -5.070653 | -1.729500 |
| H  | -7.068278 | -4.175364 | -0.874623 |

|    |           |           |           |
|----|-----------|-----------|-----------|
| C  | -1.245393 | -3.841977 | -0.515097 |
| C  | -1.212214 | -2.788813 | 0.445961  |
| H  | -0.294840 | -4.249675 | -0.864649 |
| H  | -0.254613 | -2.555947 | 0.918333  |
| Br | -0.287156 | -0.893409 | -2.432122 |
| C  | -2.420633 | -5.431958 | -2.044512 |
| H  | -2.959794 | -6.328473 | -1.694100 |
| H  | -2.906637 | -5.108097 | -2.980227 |
| H  | -1.392298 | -5.731143 | -2.290719 |
| C  | -2.255686 | -0.993430 | 1.736575  |
| Si | -1.230509 | -0.960674 | 3.350360  |
| C  | -1.411449 | -2.658115 | 4.179073  |
| H  | -0.958977 | -3.455859 | 3.567946  |
| H  | -0.915773 | -2.667227 | 5.164742  |
| H  | -2.471882 | -2.918259 | 4.331920  |
| C  | 0.603822  | -0.571611 | 3.160001  |
| H  | 1.109810  | -1.236540 | 2.443636  |
| H  | 0.764890  | 0.458983  | 2.810838  |
| H  | 1.108894  | -0.678020 | 4.135109  |
| C  | -2.031652 | 0.341117  | 4.468986  |
| H  | -3.094704 | 0.114313  | 4.654905  |
| H  | -1.521685 | 0.379760  | 5.446166  |
| H  | -1.971600 | 1.346383  | 4.023086  |
| H  | -3.195874 | -0.455889 | 1.907391  |

#### 40

B3LYP SCF energy: -3586.97697124 a.u.

B3LYP enthalpy: -3586.002332 a.u.

B3LYP free energy: -3586.170001 a.u.

M06-L SCF energy in solution: -3589.43564170 a.u.

M06-L enthalpy in solution: -3588.461002 a.u.

M06-L free energy in solution: -3588.628671 a.u.

#### Cartesian coordinates

| ATOM | X         | Y         | Z         |
|------|-----------|-----------|-----------|
| P    | -1.839739 | -1.662572 | 0.764350  |
| P    | 3.253928  | -0.075838 | -0.479011 |
| O    | 1.150272  | -1.986306 | 0.708112  |
| C    | -0.867779 | -3.061296 | 0.035826  |
| C    | -1.482259 | -4.112414 | -0.666740 |
| C    | -0.737230 | -5.136159 | -1.256266 |
| C    | 0.655449  | -5.119597 | -1.157559 |
| C    | 1.297309  | -4.081373 | -0.482526 |
| C    | 0.547293  | -3.054385 | 0.105536  |
| C    | 2.521958  | -3.001783 | 2.398606  |
| C    | 2.385346  | -2.103067 | 1.332347  |
| C    | 3.445055  | -1.259556 | 0.948134  |
| C    | 4.634030  | -1.332027 | 1.699762  |

|   |           |           |           |    |           |           |           |
|---|-----------|-----------|-----------|----|-----------|-----------|-----------|
| C | 4.780268  | -2.224278 | 2.761656  | H  | 5.060931  | -2.557574 | -0.688579 |
| C | 3.719909  | -3.067691 | 3.107253  | H  | 1.675512  | -3.629682 | 2.677442  |
| C | -3.613316 | -2.208063 | 0.721719  | H  | 2.385892  | -4.047666 | -0.422563 |
| C | -4.593607 | -1.322469 | 0.251744  | Pd | -1.345108 | 0.359272  | -0.302372 |
| C | -5.949483 | -1.665795 | 0.299572  | C  | -5.055366 | 3.779141  | -1.407695 |
| C | -6.341701 | -2.900900 | 0.817724  | C  | -4.249021 | 2.696092  | -1.715580 |
| C | -5.373582 | -3.786808 | 1.304482  | C  | -2.838252 | 2.805069  | -1.732005 |
| C | -4.022350 | -3.440022 | 1.267354  | C  | -2.245228 | 4.082675  | -1.459078 |
| C | -1.544353 | -1.790046 | 2.586073  | C  | -3.098775 | 5.169391  | -1.133818 |
| C | -1.077289 | -2.964359 | 3.196973  | C  | -4.474272 | 5.024806  | -1.104291 |
| C | -0.970326 | -3.041961 | 4.589085  | H  | -6.142250 | 3.665308  | -1.400387 |
| C | -1.330122 | -1.950164 | 5.384029  | H  | -4.714071 | 1.739764  | -1.958147 |
| C | -1.801453 | -0.779798 | 4.782029  | C  | -1.981458 | 1.656374  | -2.041749 |
| C | -1.908395 | -0.699574 | 3.391364  | C  | -0.806504 | 4.259475  | -1.513545 |
| C | 4.347445  | 1.320271  | 0.066322  | H  | -2.658715 | 6.138043  | -0.896749 |
| C | 3.802144  | 2.219720  | 1.003418  | H  | -5.107691 | 5.877809  | -0.849190 |
| C | 4.534309  | 3.325493  | 1.441242  | C  | -0.022410 | 3.169192  | -1.819140 |
| C | 5.818982  | 3.557698  | 0.938511  | C  | -0.580524 | 1.886604  | -2.056843 |
| C | 6.366674  | 2.676452  | 0.001334  | H  | 1.063522  | 3.280926  | -1.858031 |
| C | 5.638565  | 1.562571  | -0.432593 | H  | 0.088597  | 1.090819  | -2.389456 |
| C | 4.241403  | -0.897954 | -1.817257 | C  | -0.175373 | 5.587911  | -1.199171 |
| C | 4.172090  | -0.311559 | -3.096271 | H  | -0.620718 | 6.408388  | -1.784082 |
| C | 4.843557  | -0.873745 | -4.183524 | H  | -0.291461 | 5.820803  | -0.127160 |
| C | 5.581949  | -2.050852 | -4.019334 | H  | 0.902707  | 5.563277  | -1.410265 |
| C | 5.647663  | -2.651737 | -2.760127 | C  | -2.439197 | 0.287984  | -2.184027 |
| C | 4.986862  | -2.079104 | -1.666961 | Si | -1.894258 | -0.850450 | -3.611697 |
| H | -2.568666 | -4.135080 | -0.753167 | C  | -2.067780 | 0.134909  | -5.223794 |
| H | -1.246935 | -5.940008 | -1.791649 | H  | -1.373251 | 0.990618  | -5.245404 |
| H | 1.252052  | -5.910434 | -1.618857 | H  | -1.845785 | -0.500236 | -6.098260 |
| H | 5.460602  | -0.666897 | 1.441281  | H  | -3.089227 | 0.531367  | -5.346294 |
| H | 5.717062  | -2.255588 | 3.322940  | C  | -0.127808 | -1.514629 | -3.507730 |
| H | 3.816347  | -3.764710 | 3.943402  | H  | 0.631534  | -0.717859 | -3.553941 |
| H | -4.292065 | -0.348605 | -0.135513 | H  | 0.044903  | -2.088383 | -2.585245 |
| H | -6.699461 | -0.959845 | -0.065814 | H  | 0.057445  | -2.188649 | -4.361351 |
| H | -7.400054 | -3.171177 | 0.854255  | C  | -3.112526 | -2.297652 | -3.659424 |
| H | -5.673490 | -4.749364 | 1.726494  | H  | -4.148080 | -1.942613 | -3.791531 |
| H | -3.285285 | -4.132931 | 1.677951  | H  | -2.881143 | -2.971547 | -4.501104 |
| H | -0.800825 | -3.827516 | 2.587135  | H  | -3.076459 | -2.893397 | -2.734893 |
| H | -0.603632 | -3.961192 | 5.053478  | H  | -3.517964 | 0.164445  | -2.034430 |
| H | -1.241541 | -2.010045 | 6.471590  | C  | -0.478394 | 2.274443  | 1.467907  |
| H | -2.079562 | 0.081105  | 5.394724  | H  | -0.530168 | 2.975593  | 0.629892  |
| H | -2.268683 | 0.223212  | 2.932064  | C  | 0.157657  | 1.060899  | 1.234207  |
| H | 2.798624  | 2.079391  | 1.411013  | H  | 0.325727  | 0.383555  | 2.075178  |
| H | 4.073784  | 3.998410  | 2.168150  | H  | 0.898206  | 0.995043  | 0.429281  |
| H | 6.391256  | 4.427047  | 1.273279  | C  | -0.920603 | 2.820726  | 2.716523  |
| H | 7.369885  | 2.853095  | -0.396617 | H  | -0.916308 | 2.128889  | 3.569210  |
| H | 6.081260  | 0.883337  | -1.164507 | H  | -1.843930 | 3.414934  | 2.657853  |
| H | 3.585002  | 0.600433  | -3.240540 | B  | 0.237495  | 4.088743  | 3.031708  |
| H | 4.782634  | -0.396336 | -5.165104 | F  | -0.051462 | 4.592565  | 4.284826  |
| H | 6.101027  | -2.498029 | -4.870978 | F  | 1.536681  | 3.565716  | 2.975097  |
| H | 6.222417  | -3.571606 | -2.621893 | F  | 0.057837  | 5.059672  | 2.030335  |

**41-ts**

B3LYP SCF energy: -3586.96929659 a.u.

B3LYP enthalpy: -3585.996140 a.u.

B3LYP free energy: -3586.166345 a.u.

M06-L SCF energy in solution: -3589.41500822 a.u.

M06-L enthalpy in solution: -3588.441852 a.u.

M06-L free energy in solution: -3588.612057 a.u.

Imaginary frequency: -11.3557 cm<sup>-1</sup>

## Cartesian coordinates

| ATOM | X         | Y         | Z         |
|------|-----------|-----------|-----------|
| P    | -2.029879 | -1.499055 | 0.765383  |
| P    | 3.173138  | -0.308784 | -0.477636 |
| O    | 0.953560  | -1.929534 | 0.875229  |
| C    | -1.068522 | -2.964684 | 0.155337  |
| C    | -1.689247 | -4.033076 | -0.513535 |
| C    | -0.958348 | -5.118305 | -1.003531 |
| C    | 0.426281  | -5.149797 | -0.831424 |
| C    | 1.075362  | -4.098100 | -0.183652 |
| C    | 0.339286  | -3.008835 | 0.299738  |
| C    | 2.227339  | -2.820979 | 2.702142  |
| C    | 2.164643  | -2.047015 | 1.536035  |
| C    | 3.284402  | -1.324843 | 1.079602  |
| C    | 4.458183  | -1.389988 | 1.855132  |
| C    | 4.529414  | -2.158859 | 3.016898  |
| C    | 3.409110  | -2.881785 | 3.438208  |
| C    | -3.810251 | -1.998136 | 0.553989  |
| C    | -4.657363 | -1.223252 | -0.249777 |
| C    | -6.013183 | -1.546259 | -0.378703 |
| C    | -6.538346 | -2.649799 | 0.295510  |
| C    | -5.704076 | -3.425701 | 1.108660  |
| C    | -4.353974 | -3.098826 | 1.243717  |
| C    | -1.923034 | -1.635565 | 2.610115  |
| C    | -1.459974 | -2.781483 | 3.274479  |
| C    | -1.494329 | -2.854559 | 4.671404  |
| C    | -1.996126 | -1.786198 | 5.418975  |
| C    | -2.463788 | -0.642807 | 4.763362  |
| C    | -2.424807 | -0.565843 | 3.369252  |
| C    | 4.452055  | 0.995367  | -0.135383 |
| C    | 4.061591  | 2.056133  | 0.704822  |
| C    | 4.940157  | 3.103734  | 0.988019  |
| C    | 6.218655  | 3.121633  | 0.419663  |
| C    | 6.612172  | 2.081125  | -0.425845 |
| C    | 5.737950  | 1.022685  | -0.699931 |
| C    | 4.032504  | -1.392259 | -1.716872 |
| C    | 3.972635  | -0.979328 | -3.061660 |
| C    | 4.567799  | -1.735215 | -4.073677 |

|    |           |           |           |
|----|-----------|-----------|-----------|
| C  | 5.216155  | -2.935451 | -3.763327 |
| C  | 5.270162  | -3.365470 | -2.435243 |
| C  | 4.687493  | -2.599024 | -1.419307 |
| H  | -2.770552 | -4.019094 | -0.651807 |
| H  | -1.473404 | -5.932351 | -1.518142 |
| H  | 1.012747  | -5.989384 | -1.212766 |
| H  | 5.334074  | -0.822075 | 1.534962  |
| H  | 5.456185  | -2.189162 | 3.594850  |
| H  | 3.447854  | -3.480768 | 4.351514  |
| H  | -4.246048 | -0.358004 | -0.769877 |
| H  | -6.659168 | -0.927553 | -1.006785 |
| H  | -7.597103 | -2.902863 | 0.196362  |
| H  | -6.109253 | -4.285412 | 1.648665  |
| H  | -3.723353 | -3.703027 | 1.899080  |
| H  | -1.082041 | -3.630794 | 2.701119  |
| H  | -1.130996 | -3.754033 | 5.175679  |
| H  | -2.022912 | -1.843684 | 6.510089  |
| H  | -2.856373 | 0.198828  | 5.339582  |
| H  | -2.780414 | 0.337270  | 2.868092  |
| H  | 3.064239  | 2.067637  | 1.150984  |
| H  | 4.614249  | 3.908970  | 1.650972  |
| H  | 6.904519  | 3.945621  | 0.633308  |
| H  | 7.609119  | 2.087400  | -0.875019 |
| H  | 6.063835  | 0.214984  | -1.358525 |
| H  | 3.453694  | -0.051329 | -3.318905 |
| H  | 4.514853  | -1.391589 | -5.110059 |
| H  | 5.673711  | -3.534207 | -4.555074 |
| H  | 5.774714  | -4.302207 | -2.183058 |
| H  | 4.752633  | -2.944807 | -0.385715 |
| H  | 1.335525  | -3.352956 | 3.034030  |
| H  | 2.159536  | -4.106090 | -0.066327 |
| Pd | -1.345096 | 0.451591  | -0.282824 |
| C  | -4.566791 | 4.247127  | -1.984564 |
| C  | -3.840107 | 3.076770  | -2.133561 |
| C  | -2.441579 | 3.035559  | -1.924762 |
| C  | -1.767392 | 4.253818  | -1.578115 |
| C  | -2.539540 | 5.435456  | -1.428284 |
| C  | -3.910076 | 5.437336  | -1.622546 |
| H  | -5.647013 | 4.244071  | -2.150874 |
| H  | -4.360950 | 2.164476  | -2.425718 |
| C  | -1.674983 | 1.791265  | -2.096249 |
| C  | -0.328553 | 4.277687  | -1.392284 |
| H  | -2.040558 | 6.364991  | -1.151667 |
| H  | -4.478444 | 6.362838  | -1.499406 |
| C  | 0.367265  | 3.103423  | -1.537779 |
| C  | -0.274950 | 1.873210  | -1.857117 |
| H  | 1.451970  | 3.097915  | -1.402872 |
| H  | 0.362931  | 1.021521  | -2.101449 |
| C  | 0.387731  | 5.557648  | -1.045795 |
| H  | 0.195410  | 6.350944  | -1.787582 |
| H  | 0.076844  | 5.946348  | -0.061790 |

|    |           |           |           |   |           |           |           |
|----|-----------|-----------|-----------|---|-----------|-----------|-----------|
| H  | 1.473828  | 5.392896  | -1.004024 | C | -2.911191 | -3.145357 | -1.659469 |
| C  | -2.255101 | 0.492955  | -2.344820 | C | -2.671442 | -1.955418 | -0.959918 |
| Si | -1.664857 | -0.721863 | -3.666291 | C | -3.629338 | -0.923501 | -0.925811 |
| C  | -1.639077 | 0.167593  | -5.346464 | C | -4.823720 | -1.123598 | -1.644919 |
| H  | -0.917747 | 1.001740  | -5.342314 | C | -5.071553 | -2.306132 | -2.342395 |
| H  | -1.352767 | -0.520880 | -6.160157 | C | -4.111931 | -3.323397 | -2.344157 |
| H  | -2.628605 | 0.587247  | -5.592801 | C | 3.229768  | -2.459567 | 0.232735  |
| C  | 0.045323  | -1.481085 | -3.392103 | C | 4.304585  | -1.574979 | 0.400373  |
| H  | 0.846471  | -0.725893 | -3.409299 | C | 5.592818  | -2.056812 | 0.660327  |
| H  | 0.109728  | -2.013945 | -2.431672 | C | 5.821757  | -3.430050 | 0.759278  |
| H  | 0.263448  | -2.205143 | -4.195462 | C | 4.759144  | -4.323381 | 0.580468  |
| C  | -2.945383 | -2.116140 | -3.764666 | C | 3.477015  | -3.843418 | 0.308659  |
| H  | -3.957320 | -1.718861 | -3.950476 | C | 1.334257  | -2.715168 | -1.816896 |
| H  | -2.702861 | -2.806692 | -4.589838 | C | 0.700681  | -3.965718 | -1.892076 |
| H  | -2.982121 | -2.705274 | -2.835331 | C | 0.660087  | -4.669256 | -3.100136 |
| H  | -3.351679 | 0.503949  | -2.366727 | C | 1.254129  | -4.132816 | -4.246048 |
| C  | -0.742299 | 2.432137  | 1.761470  | C | 1.890061  | -2.889894 | -4.177204 |
| H  | -0.783023 | 3.192512  | 0.971634  | C | 1.929489  | -2.183895 | -2.971730 |
| C  | -0.162984 | 1.148449  | 1.377009  | C | -4.271473 | 1.866351  | -0.969974 |
| H  | -0.073481 | 0.436360  | 2.206074  | C | -3.682868 | 2.341242  | -2.158265 |
| H  | 0.797819  | 1.244475  | 0.851345  | C | -4.333724 | 3.291474  | -2.947565 |
| C  | -1.229039 | 2.798056  | 2.977161  | C | -5.576427 | 3.800511  | -2.553876 |
| H  | -1.200272 | 2.119240  | 3.834578  | C | -6.163407 | 3.347170  | -1.370146 |
| H  | -1.750217 | 3.749178  | 3.112946  | C | -5.518531 | 2.384928  | -0.584168 |
| B  | 0.877953  | 4.285780  | 3.278361  | C | -4.329692 | 0.427462  | 1.539201  |
| F  | 0.673391  | 4.303819  | 4.586134  | C | -4.149073 | 1.377590  | 2.562722  |
| F  | 1.856424  | 3.531073  | 2.790198  | C | -4.870541 | 1.296759  | 3.755494  |
| F  | 0.390332  | 5.268605  | 2.529830  | C | -5.772648 | 0.247270  | 3.959557  |
|    |           |           |           | C | -5.950187 | -0.712054 | 2.959584  |
|    |           |           |           | C | -5.238595 | -0.621359 | 1.757706  |
|    |           |           |           | H | 1.864559  | -3.349058 | 2.302855  |
|    |           |           |           | H | 0.254408  | -4.366705 | 3.873575  |
|    |           |           |           | H | -2.202563 | -4.211057 | 3.410879  |
|    |           |           |           | H | -5.572890 | -0.329085 | -1.654560 |
|    |           |           |           | H | -6.009578 | -2.430698 | -2.888796 |
|    |           |           |           | H | -4.289026 | -4.250630 | -2.894857 |
|    |           |           |           | H | 4.130231  | -0.501804 | 0.313833  |
|    |           |           |           | H | 6.418809  | -1.351405 | 0.781811  |
|    |           |           |           | H | 6.826758  | -3.807376 | 0.965354  |
|    |           |           |           | H | 4.931722  | -5.401019 | 0.642652  |
|    |           |           |           | H | 2.666652  | -4.557063 | 0.146197  |
|    |           |           |           | H | 0.243260  | -4.402354 | -1.001293 |
|    |           |           |           | H | 0.164956  | -5.643212 | -3.143501 |
|    |           |           |           | H | 1.222109  | -4.682819 | -5.190095 |
|    |           |           |           | H | 2.355322  | -2.460124 | -5.067879 |
|    |           |           |           | H | 2.418973  | -1.208409 | -2.933269 |
|    |           |           |           | H | -2.704683 | 1.962523  | -2.469200 |
|    |           |           |           | H | -3.862914 | 3.642341  | -3.869680 |
|    |           |           |           | H | -6.082429 | 4.551125  | -3.166612 |
|    |           |           |           | H | -7.133213 | 3.740878  | -1.053696 |
|    |           |           |           | H | -5.993676 | 2.038693  | 0.335980  |

## 42

B3LYP SCF energy: -3262.64417871 a.u.  
 B3LYP enthalpy: -3261.688840 a.u.  
 B3LYP free energy: -3261.847617 a.u.  
 M06-L SCF energy in solution: -3264.79047675 a.u.  
 M06-L enthalpy in solution: -3263.835138 a.u.  
 M06-L free energy in solution: -3263.993915 a.u.

### Cartesian coordinates

| ATOM | X         | Y         | Z         |
|------|-----------|-----------|-----------|
| P    | 1.558891  | -1.783655 | -0.229503 |
| P    | -3.281974 | 0.643460  | 0.020721  |
| O    | -1.432587 | -1.768507 | -0.372269 |
| C    | 0.371582  | -2.606630 | 0.931423  |
| C    | 0.797487  | -3.274927 | 2.091038  |
| C    | -0.110978 | -3.852975 | 2.981777  |
| C    | -1.479538 | -3.765791 | 2.722944  |
| C    | -1.937118 | -3.091134 | 1.589903  |
| C    | -1.022653 | -2.504392 | 0.706393  |

|    |           |           |           |
|----|-----------|-----------|-----------|
| H  | -3.432173 | 2.191870  | 2.423336  |
| H  | -4.718623 | 2.049704  | 4.533330  |
| H  | -6.330869 | 0.175889  | 4.896612  |
| H  | -6.651678 | -1.537131 | 3.110632  |
| H  | -5.401973 | -1.373865 | 0.983718  |
| H  | -2.136113 | -3.911950 | -1.678760 |
| H  | -3.006396 | -2.997308 | 1.397024  |
| Pd | 1.367289  | 0.521609  | -0.164144 |
| C  | 5.857596  | 3.282871  | 0.051669  |
| C  | 4.769938  | 2.638009  | 0.619520  |
| C  | 3.439403  | 2.992050  | 0.295975  |
| C  | 3.224439  | 4.076124  | -0.618177 |
| C  | 4.357878  | 4.715011  | -1.185758 |
| C  | 5.648269  | 4.327631  | -0.866027 |
| H  | 6.873356  | 2.983399  | 0.322093  |
| H  | 4.945403  | 1.843163  | 1.345236  |
| C  | 2.292774  | 2.306877  | 0.914074  |
| C  | 1.880537  | 4.515785  | -0.942198 |
| H  | 4.210158  | 5.533534  | -1.891432 |
| H  | 6.500772  | 4.839218  | -1.320361 |
| C  | 0.822573  | 3.857045  | -0.368511 |
| C  | 0.998827  | 2.756118  | 0.520308  |
| H  | -0.198052 | 4.177427  | -0.595577 |
| H  | 0.121802  | 2.400459  | 1.066534  |
| C  | 1.652340  | 5.671131  | -1.883154 |
| H  | 2.129736  | 6.598314  | -1.522476 |
| H  | 2.063423  | 5.470926  | -2.887721 |
| H  | 0.577509  | 5.871823  | -1.999059 |
| C  | 2.388516  | 1.150555  | 1.765221  |
| Si | 1.447229  | 0.952413  | 3.391042  |
| C  | 1.547392  | 2.577756  | 4.372554  |
| H  | 1.050540  | 3.400672  | 3.832391  |
| H  | 1.060003  | 2.479744  | 5.357858  |
| H  | 2.594777  | 2.878297  | 4.541682  |
| C  | -0.380697 | 0.485367  | 3.246552  |
| H  | -0.963671 | 1.235328  | 2.689515  |
| H  | -0.517416 | -0.479834 | 2.736641  |
| H  | -0.827349 | 0.401489  | 4.251999  |
| C  | 2.340498  | -0.393709 | 4.384185  |
| H  | 3.392197  | -0.119513 | 4.571351  |
| H  | 1.855753  | -0.547204 | 5.362915  |
| H  | 2.334323  | -1.358612 | 3.852875  |
| H  | 3.408642  | 0.774689  | 1.900756  |
| C  | 1.022494  | 1.460419  | -2.985640 |
| H  | 1.345744  | 2.460758  | -2.669381 |
| C  | 0.258720  | 0.692631  | -1.987595 |
| H  | -0.095975 | -0.273595 | -2.368495 |
| H  | -0.595525 | 1.262815  | -1.588187 |
| C  | 1.366437  | 1.072752  | -4.231408 |
| H  | 1.051738  | 0.108248  | -4.642439 |
| H  | 1.958600  | 1.720285  | -4.884903 |

### 43-ts

B3LYP SCF energy: -3262.62913864 a.u.

B3LYP enthalpy: -3261.674634 a.u.

B3LYP free energy: -3261.829433 a.u.

M06-L SCF energy in solution: -3264.77488981 a.u.

M06-L enthalpy in solution: -3263.820385 a.u.

M06-L free energy in solution: -3263.975184 a.u.

Imaginary frequency: -336.0902 cm<sup>-1</sup>

### Cartesian coordinates

| ATOM | X         | Y         | Z         |
|------|-----------|-----------|-----------|
| P    | 1.721025  | -1.649496 | -0.374626 |
| P    | -3.353926 | 0.411298  | 0.024160  |
| O    | -1.323036 | -1.773789 | -0.637437 |
| C    | 0.504703  | -2.601417 | 0.660709  |
| C    | 0.928619  | -3.326805 | 1.788536  |
| C    | 0.028873  | -3.998816 | 2.618962  |
| C    | -1.335346 | -3.956681 | 2.330887  |
| C    | -1.793151 | -3.233181 | 1.229307  |
| C    | -0.887965 | -2.547994 | 0.409062  |
| C    | -2.699555 | -3.120241 | -2.062974 |
| C    | -2.551085 | -1.996986 | -1.240369 |
| C    | -3.594151 | -1.060985 | -1.090241 |
| C    | -4.775505 | -1.282616 | -1.823984 |
| C    | -4.929188 | -2.398547 | -2.647776 |
| C    | -3.888551 | -3.324744 | -2.761686 |
| C    | 3.358802  | -2.424770 | 0.069402  |
| C    | 4.425793  | -1.599531 | 0.447546  |
| C    | 5.690260  | -2.137976 | 0.714770  |
| C    | 5.901676  | -3.513241 | 0.609640  |
| C    | 4.844737  | -4.348585 | 0.228280  |
| C    | 3.587548  | -3.809183 | -0.046766 |
| C    | 1.552814  | -2.405339 | -2.067150 |
| C    | 0.910140  | -3.629012 | -2.310418 |
| C    | 0.904700  | -4.190012 | -3.591752 |
| C    | 1.544373  | -3.536945 | -4.648683 |
| C    | 2.194980  | -2.321832 | -4.415126 |
| C    | 2.197891  | -1.760988 | -3.135555 |
| C    | -4.613275 | 1.588513  | -0.667347 |
| C    | -4.265975 | 2.269793  | -1.850576 |
| C    | -5.128537 | 3.212914  | -2.412020 |
| C    | -6.346674 | 3.509817  | -1.790098 |
| C    | -6.694605 | 2.852780  | -0.607717 |
| C    | -5.836703 | 1.896952  | -0.050662 |
| C    | -4.162752 | -0.156392 | 1.596813  |
| C    | -3.797752 | 0.524478  | 2.772057  |
| C    | -4.357071 | 0.178454  | 4.005234  |

|    |           |           |           |
|----|-----------|-----------|-----------|
| C  | -5.279897 | -0.868520 | 4.086630  |
| C  | -5.642440 | -1.562280 | 2.927959  |
| C  | -5.090933 | -1.207874 | 1.692479  |
| H  | 1.992270  | -3.372714 | 2.023139  |
| H  | 0.398406  | -4.551510 | 3.485472  |
| H  | -2.054775 | -4.475424 | 2.969218  |
| H  | -5.590642 | -0.560501 | -1.745147 |
| H  | -5.859844 | -2.542223 | -3.202120 |
| H  | -3.993708 | -4.199737 | -3.407926 |
| H  | 4.255558  | -0.526366 | 0.528010  |
| H  | 6.509836  | -1.476138 | 1.006274  |
| H  | 6.887491  | -3.936656 | 0.819042  |
| H  | 5.003148  | -5.426365 | 0.136817  |
| H  | 2.780428  | -4.475135 | -0.358183 |
| H  | 0.418980  | -4.158733 | -1.491131 |
| H  | 0.401162  | -5.145547 | -3.762646 |
| H  | 1.538785  | -3.974970 | -5.650048 |
| H  | 2.702723  | -1.804707 | -5.233378 |
| H  | 2.714315  | -0.814193 | -2.962134 |
| H  | -3.308365 | 2.061004  | -2.336510 |
| H  | -4.843430 | 3.726047  | -3.334291 |
| H  | -7.018595 | 4.254738  | -2.224234 |
| H  | -7.642382 | 3.080898  | -0.112504 |
| H  | -6.126433 | 1.390062  | 0.871933  |
| H  | -3.061387 | 1.330953  | 2.720269  |
| H  | -4.060957 | 0.721276  | 4.906586  |
| H  | -5.711805 | -1.146745 | 5.051482  |
| H  | -6.362164 | -2.383549 | 2.983896  |
| H  | -5.390431 | -1.755575 | 0.796272  |
| H  | -1.865288 | -3.813947 | -2.163761 |
| H  | -2.860230 | -3.177551 | 1.013280  |
| Pd | 1.551037  | 0.666377  | -0.134537 |
| C  | 5.258235  | 3.294895  | -1.151124 |
| C  | 4.436904  | 2.697062  | -0.208904 |
| C  | 3.102284  | 3.124151  | 0.004034  |
| C  | 2.610097  | 4.213007  | -0.780816 |
| C  | 3.470416  | 4.803268  | -1.740489 |
| C  | 4.768861  | 4.358588  | -1.929173 |
| H  | 6.285164  | 2.943686  | -1.281149 |
| H  | 4.839405  | 1.886214  | 0.398232  |
| C  | 2.239481  | 2.505122  | 1.036259  |
| C  | 1.244970  | 4.697642  | -0.593544 |
| H  | 3.104261  | 5.634603  | -2.344345 |
| H  | 5.410188  | 4.839357  | -2.672466 |
| C  | 0.587376  | 4.286866  | 0.601882  |
| C  | 1.021573  | 3.216216  | 1.336823  |
| H  | -0.349596 | 4.780343  | 0.877326  |
| H  | 0.428810  | 2.883655  | 2.190077  |
| C  | 0.850907  | 6.035593  | -1.186771 |
| H  | 1.465568  | 6.848368  | -0.761312 |
| H  | 0.968973  | 6.074219  | -2.280059 |

|    |           |           |           |
|----|-----------|-----------|-----------|
| H  | -0.201678 | 6.262874  | -0.960196 |
| C  | 2.609988  | 1.329178  | 1.754931  |
| Si | 1.980595  | 0.805033  | 3.451156  |
| C  | 2.236700  | 2.203654  | 4.716437  |
| H  | 1.653536  | 3.103293  | 4.461096  |
| H  | 1.932754  | 1.881735  | 5.727482  |
| H  | 3.297448  | 2.501694  | 4.763301  |
| C  | 0.156176  | 0.293937  | 3.506947  |
| H  | -0.516563 | 1.122849  | 3.235764  |
| H  | -0.051060 | -0.536554 | 2.814504  |
| H  | -0.116114 | -0.036169 | 4.524008  |
| C  | 3.035166  | -0.666005 | 4.017905  |
| H  | 4.103390  | -0.396001 | 4.066791  |
| H  | 2.730092  | -1.000358 | 5.023735  |
| H  | 2.939637  | -1.524019 | 3.334466  |
| H  | 3.656222  | 1.029834  | 1.637088  |
| C  | -0.162468 | 2.109648  | -1.696041 |
| H  | -1.055923 | 2.021693  | -1.065738 |
| C  | 0.473674  | 0.893785  | -2.034276 |
| H  | 1.227655  | 0.929655  | -2.830075 |
| H  | -0.153569 | 0.000298  | -2.047027 |
| C  | 0.188284  | 3.402100  | -2.108338 |
| H  | 0.953323  | 3.524370  | -2.880722 |
| H  | -0.603328 | 4.151668  | -2.108142 |

#### 44

B3LYP SCF energy: -3262.65652957 a.u.

B3LYP enthalpy: -3261.699689 a.u.

B3LYP free energy: -3261.853883 a.u.

M06-L SCF energy in solution: -3264.80003560 a.u.

M06-L enthalpy in solution: -3263.843195 a.u.

M06-L free energy in solution: -3263.997389 a.u.

#### Cartesian coordinates

| ATOM | X         | Y         | Z         |
|------|-----------|-----------|-----------|
| P    | 1.646697  | -1.733109 | -0.320377 |
| P    | -3.306625 | 0.484847  | 0.000499  |
| O    | -1.379807 | -1.805604 | -0.564729 |
| C    | 0.431452  | -2.695897 | 0.709656  |
| C    | 0.843515  | -3.452780 | 1.820664  |
| C    | -0.068698 | -4.112234 | 2.648549  |
| C    | -1.434149 | -4.022481 | 2.377925  |
| C    | -1.880700 | -3.268341 | 1.292003  |
| C    | -0.961087 | -2.603632 | 0.471517  |
| C    | -2.798998 | -3.139301 | -1.964662 |
| C    | -2.605748 | -1.995778 | -1.179255 |
| C    | -3.599914 | -1.002172 | -1.081022 |
| C    | -4.777835 | -1.185427 | -1.830716 |

|   |           |           |           |    |           |           |           |
|---|-----------|-----------|-----------|----|-----------|-----------|-----------|
| C | -4.976612 | -2.320437 | -2.617761 | H  | -5.437935 | -1.602334 | 0.758011  |
| C | -3.985387 | -3.304896 | -2.677590 | H  | -2.001586 | -3.879978 | -2.024775 |
| C | 3.285053  | -2.521634 | 0.097986  | H  | -2.947729 | -3.175457 | 1.087077  |
| C | 4.366291  | -1.691108 | 0.423762  | Pd | 1.488680  | 0.652930  | -0.107056 |
| C | 5.634775  | -2.228482 | 0.673517  | C  | 5.589034  | 3.070441  | -0.767987 |
| C | 5.837445  | -3.607293 | 0.601291  | C  | 4.639457  | 2.535292  | 0.099021  |
| C | 4.768675  | -4.447085 | 0.265561  | C  | 3.294758  | 2.955912  | 0.073244  |
| C | 3.507082  | -3.908938 | 0.007917  | C  | 2.916749  | 3.964132  | -0.847324 |
| C | 1.455769  | -2.473522 | -2.018873 | C  | 3.886622  | 4.493469  | -1.713346 |
| C | 0.822258  | -3.700674 | -2.268399 | C  | 5.211348  | 4.055270  | -1.684293 |
| C | 0.793656  | -4.240158 | -3.558735 | H  | 6.625885  | 2.727163  | -0.719606 |
| C | 1.403046  | -3.563051 | -4.618473 | H  | 4.954422  | 1.790082  | 0.830815  |
| C | 2.043906  | -2.343634 | -4.379233 | C  | 2.271661  | 2.420277  | 1.025483  |
| C | 2.066994  | -1.802792 | -3.091083 | C  | 1.453827  | 4.405873  | -0.916368 |
| C | -4.416350 | 1.732273  | -0.812461 | H  | 3.608645  | 5.266912  | -2.430933 |
| C | -3.916495 | 2.362256  | -1.968846 | H  | 5.945677  | 4.488720  | -2.368216 |
| C | -4.659194 | 3.345842  | -2.624551 | C  | 0.842929  | 4.345848  | 0.463228  |
| C | -5.906979 | 3.734655  | -2.123953 | C  | 1.182427  | 3.370523  | 1.321923  |
| C | -6.405539 | 3.128673  | -0.968307 | H  | 0.044069  | 5.052388  | 0.708751  |
| C | -5.668250 | 2.132248  | -0.317663 | H  | 0.657072  | 3.273630  | 2.274734  |
| C | -4.258482 | 0.044684  | 1.533691  | C  | 1.295019  | 5.823245  | -1.496474 |
| C | -3.978769 | 0.807224  | 2.682757  | H  | 1.913606  | 6.551049  | -0.949166 |
| C | -4.639282 | 0.558004  | 3.888314  | H  | 1.567446  | 5.871632  | -2.561909 |
| C | -5.578876 | -0.474262 | 3.972269  | H  | 0.243626  | 6.142138  | -1.416098 |
| C | -5.855576 | -1.249507 | 2.842599  | C  | 2.502880  | 1.267247  | 1.809963  |
| C | -5.203282 | -0.991287 | 1.632093  | Si | 1.710401  | 0.812662  | 3.462692  |
| H | 1.907391  | -3.535363 | 2.043794  | C  | 2.070764  | 2.164412  | 4.752354  |
| H | 0.292616  | -4.691322 | 3.501265  | H  | 1.608636  | 3.129560  | 4.489683  |
| H | -2.162048 | -4.528648 | 3.016793  | H  | 1.687587  | 1.868522  | 5.744215  |
| H | -5.554133 | -0.418365 | -1.792178 | H  | 3.156032  | 2.334341  | 4.849666  |
| H | -5.903116 | -2.434446 | -3.185762 | C  | -0.159575 | 0.538876  | 3.380630  |
| H | -4.126541 | -4.195761 | -3.294682 | H  | -0.693197 | 1.458529  | 3.093829  |
| H | 4.209980  | -0.612733 | 0.466506  | H  | -0.418562 | -0.234531 | 2.640998  |
| H | 6.465236  | -1.562901 | 0.922719  | H  | -0.547593 | 0.217721  | 4.362118  |
| H | 6.826327  | -4.029771 | 0.797802  | C  | 2.555379  | -0.770212 | 4.069630  |
| H | 4.921394  | -5.527336 | 0.195390  | H  | 3.642094  | -0.620036 | 4.182906  |
| H | 2.690854  | -4.578439 | -0.271185 | H  | 2.155531  | -1.075775 | 5.050956  |
| H | 0.353917  | -4.248522 | -1.447432 | H  | 2.403022  | -1.605424 | 3.369853  |
| H | 0.295854  | -5.197815 | -3.734702 | H  | 3.504695  | 0.833404  | 1.731225  |
| H | 1.380735  | -3.985003 | -5.626512 | C  | 0.140934  | 2.109357  | -1.342190 |
| H | 2.527611  | -1.807604 | -5.200018 | H  | -0.633960 | 2.208514  | -0.574295 |
| H | 2.571118  | -0.849535 | -2.913118 | C  | 0.240021  | 0.894444  | -1.991909 |
| H | -2.933176 | 2.079312  | -2.356377 | H  | 0.836204  | 0.807354  | -2.905441 |
| H | -4.257470 | 3.819020  | -3.524547 | H  | -0.492998 | 0.106670  | -1.816668 |
| H | -6.485086 | 4.511529  | -2.631027 | C  | 0.677032  | 3.406782  | -1.882218 |
| H | -7.377688 | 3.429031  | -0.567962 | H  | 1.311219  | 3.222183  | -2.765034 |
| H | -6.074005 | 1.665390  | 0.582238  | H  | -0.203854 | 3.969106  | -2.242437 |
| H | -3.229225 | 1.601588  | 2.632795  |    |           |           |           |
| H | -4.409648 | 1.164773  | 4.768096  |    |           |           |           |
| H | -6.089629 | -0.677424 | 4.917116  |    |           |           |           |
| H | -6.586730 | -2.060476 | 2.900488  |    |           |           |           |

B3LYP SCF energy: -3254.63869253 a.u.  
 B3LYP enthalpy: -3253.745562 a.u.  
 B3LYP free energy: -3253.896443 a.u.  
 M06-L SCF energy in solution: -3256.82858594 a.u.  
 M06-L enthalpy in solution: -3255.935455 a.u.  
 M06-L free energy in solution: -3256.086336 a.u.

Cartesian coordinates

| ATOM | X         | Y         | Z         |
|------|-----------|-----------|-----------|
| P    | -0.535149 | -1.910569 | -0.077940 |
| P    | 2.288282  | 0.640342  | 0.099329  |
| O    | 2.111918  | -1.621017 | -1.515057 |
| C    | 0.081221  | -2.889733 | -1.536190 |
| C    | -0.672938 | -3.912579 | -2.141580 |
| C    | -0.200015 | -4.595132 | -3.265528 |
| C    | 1.037646  | -4.263466 | -3.820718 |
| C    | 1.815511  | -3.267233 | -3.228131 |
| C    | 1.348103  | -2.611624 | -2.087426 |
| C    | 3.838344  | -3.077455 | -0.564249 |
| C    | 3.106096  | -1.890408 | -0.600574 |
| C    | 3.365298  | -0.839305 | 0.296739  |
| C    | 4.400163  | -0.993341 | 1.229315  |
| C    | 5.145972  | -2.175331 | 1.272380  |
| C    | 4.859745  | -3.212340 | 0.381219  |
| C    | -2.257811 | -2.548524 | 0.147936  |
| C    | -3.193998 | -2.438243 | -0.897299 |
| C    | -4.498855 | -2.904008 | -0.734605 |
| C    | -4.897528 | -3.474244 | 0.478835  |
| C    | -3.979206 | -3.581077 | 1.524097  |
| C    | -2.666893 | -3.124884 | 1.361841  |
| C    | 0.345191  | -2.633681 | 1.373679  |
| C    | 0.823817  | -3.953876 | 1.364556  |
| C    | 1.391391  | -4.506052 | 2.516082  |
| C    | 1.479068  | -3.752008 | 3.689948  |
| C    | 0.998396  | -2.439278 | 3.709602  |
| C    | 0.439407  | -1.882065 | 2.556253  |
| C    | 2.816451  | 1.762300  | 1.471588  |
| C    | 2.585941  | 1.347258  | 2.798604  |
| C    | 2.898617  | 2.182948  | 3.872748  |
| C    | 3.430337  | 3.456484  | 3.642093  |
| C    | 3.650648  | 3.884541  | 2.331323  |
| C    | 3.349234  | 3.044851  | 1.252389  |
| C    | 2.984360  | 1.393165  | -1.439236 |
| C    | 2.133988  | 1.691582  | -2.514677 |
| C    | 2.650434  | 2.209870  | -3.707320 |
| C    | 4.023219  | 2.433007  | -3.836644 |
| C    | 4.881116  | 2.128050  | -2.773626 |
| C    | 4.367700  | 1.605428  | -1.585146 |
| H    | -1.645225 | -4.185514 | -1.733409 |
| H    | -0.809520 | -5.384738 | -3.710298 |

|    |           |           |           |
|----|-----------|-----------|-----------|
| H  | 1.401352  | -4.780514 | -4.711638 |
| H  | 4.626780  | -0.188568 | 1.930494  |
| H  | 5.951179  | -2.283286 | 2.002086  |
| H  | 5.440009  | -4.137608 | 0.412899  |
| H  | -2.909807 | -1.987157 | -1.847897 |
| H  | -5.208498 | -2.814194 | -1.560363 |
| H  | -5.921304 | -3.833707 | 0.607305  |
| H  | -4.278999 | -4.025256 | 2.476188  |
| H  | -1.968552 | -3.225951 | 2.192588  |
| H  | 0.750066  | -4.559728 | 0.459381  |
| H  | 1.762469  | -5.533537 | 2.495970  |
| H  | 1.918944  | -4.188228 | 4.589994  |
| H  | 1.056297  | -1.847957 | 4.626791  |
| H  | 0.062052  | -0.856702 | 2.577166  |
| H  | 2.170235  | 0.356657  | 2.996327  |
| H  | 2.723500  | 1.839508  | 4.895207  |
| H  | 3.671621  | 4.111448  | 4.482591  |
| H  | 4.067084  | 4.876757  | 2.141059  |
| H  | 3.542261  | 3.395492  | 0.237107  |
| H  | 1.061528  | 1.501377  | -2.426044 |
| H  | 1.977422  | 2.431443  | -4.539199 |
| H  | 4.427948  | 2.836111  | -4.768164 |
| H  | 5.957043  | 2.290375  | -2.873715 |
| H  | 5.051809  | 1.354110  | -0.771212 |
| H  | 3.619305  | -3.884527 | -1.263897 |
| H  | 2.786745  | -2.984539 | -3.638488 |
| Pd | -0.250107 | 0.497159  | -0.101195 |
| C  | -3.933238 | 0.718962  | 2.881218  |
| C  | -2.954744 | 0.628664  | 1.913257  |
| C  | -3.258482 | 0.711954  | 0.524160  |
| C  | -4.639933 | 0.876716  | 0.139208  |
| C  | -5.623352 | 0.965467  | 1.166225  |
| C  | -5.284346 | 0.893532  | 2.501777  |
| H  | -3.667786 | 0.652828  | 3.939213  |
| H  | -1.913018 | 0.481776  | 2.206471  |
| C  | -2.247292 | 0.634932  | -0.487133 |
| C  | -4.992577 | 0.953743  | -1.251969 |
| H  | -6.671018 | 1.093831  | 0.890508  |
| H  | -6.060356 | 0.967106  | 3.267578  |
| C  | -3.980921 | 0.867537  | -2.190625 |
| C  | -2.621023 | 0.707568  | -1.814813 |
| H  | -4.229896 | 0.922606  | -3.254561 |
| H  | -1.873272 | 0.627679  | -2.609890 |
| C  | -6.427725 | 1.126304  | -1.683417 |
| H  | -7.064912 | 0.299170  | -1.328368 |
| H  | -6.866293 | 2.057445  | -1.287209 |
| H  | -6.507346 | 1.161875  | -2.779242 |
| N  | -0.407677 | 2.920151  | 1.476561  |
| N  | -0.646568 | 3.041470  | 2.566409  |
| C  | -0.204184 | 2.769181  | 0.150037  |
| Si | -1.198662 | 4.155023  | -0.842875 |



|   |           |          |           |
|---|-----------|----------|-----------|
| C | -0.343635 | 5.761789 | -0.335841 |
| H | 0.727744  | 5.761965 | -0.594754 |
| H | -0.809738 | 6.613087 | -0.860478 |
| H | -0.433184 | 5.959149 | 0.745258  |
| C | -0.944914 | 3.860067 | -2.679251 |
| H | 0.121596  | 3.887829 | -2.950301 |
| H | -1.374014 | 2.904751 | -3.011424 |
| H | -1.450273 | 4.668350 | -3.234433 |
| C | -2.999829 | 4.211754 | -0.330383 |
| H | -3.121179 | 4.269637 | 0.763243  |
| H | -3.452960 | 5.122738 | -0.757032 |
| H | -3.568149 | 3.345103 | -0.694107 |
| H | 0.860009  | 2.991426 | -0.019613 |

#### 46

B3LYP SCF energy: -5713.17686794 a.u.  
 B3LYP enthalpy: -5712.338354 a.u.  
 B3LYP free energy: -5712.495405 a.u.  
 M06-L SCF energy in solution: -5715.59228203 a.u.  
 M06-L enthalpy in solution: -5714.753768 a.u.  
 M06-L free energy in solution: -5714.910819 a.u.

#### Cartesian coordinates

| ATOM | X         | Y         | Z         |
|------|-----------|-----------|-----------|
| P    | 1.971230  | -1.220700 | -0.840856 |
| P    | -3.214535 | -0.069318 | 0.472439  |
| O    | -0.993633 | -1.820104 | -0.464337 |
| C    | 1.179392  | -2.762209 | -0.143337 |
| C    | 1.939761  | -3.861494 | 0.297198  |
| C    | 1.342300  | -5.023169 | 0.789648  |
| C    | -0.050665 | -5.109162 | 0.859252  |
| C    | -0.832119 | -4.040928 | 0.426006  |
| C    | -0.226018 | -2.881177 | -0.080152 |
| C    | -2.050286 | -2.837537 | -2.378964 |
| C    | -2.097852 | -1.982482 | -1.271068 |
| C    | -3.242958 | -1.213480 | -0.991699 |
| C    | -4.332978 | -1.322074 | -1.871561 |
| C    | -4.300491 | -2.177587 | -2.974616 |
| C    | -3.153891 | -2.937323 | -3.224945 |
| C    | 3.754879  | -1.461712 | -0.362509 |
| C    | 4.105281  | -1.587665 | 0.995082  |
| C    | 5.440967  | -1.720720 | 1.379046  |
| C    | 6.457211  | -1.707195 | 0.418624  |
| C    | 6.123753  | -1.566409 | -0.929878 |
| C    | 4.784582  | -1.449776 | -1.318418 |
| C    | 2.036366  | -1.597428 | -2.656089 |
| C    | 1.959530  | -2.906491 | -3.158577 |
| C    | 2.077973  | -3.149767 | -4.530881 |

|    |           |           |           |
|----|-----------|-----------|-----------|
| C  | 2.283344  | -2.087756 | -5.416241 |
| C  | 2.364386  | -0.782436 | -4.923599 |
| C  | 2.231506  | -0.535189 | -3.554210 |
| C  | -4.452978 | 1.211806  | -0.049032 |
| C  | -3.994134 | 2.194843  | -0.948688 |
| C  | -4.834436 | 3.236520  | -1.347482 |
| C  | -6.138269 | 3.324363  | -0.846871 |
| C  | -6.599458 | 2.358258  | 0.050826  |
| C  | -5.764090 | 1.306916  | 0.446482  |
| C  | -4.167684 | -1.046964 | 1.738784  |
| C  | -4.158788 | -0.545107 | 3.055240  |
| C  | -4.808837 | -1.222636 | 4.089444  |
| C  | -5.462544 | -2.433361 | 3.834001  |
| C  | -5.464942 | -2.952532 | 2.536800  |
| C  | -4.827145 | -2.264345 | 1.497899  |
| H  | 3.027365  | -3.810609 | 0.247073  |
| H  | 1.967364  | -5.855810 | 1.121348  |
| H  | -0.532207 | -6.005978 | 1.258021  |
| H  | -5.222764 | -0.716314 | -1.685976 |
| H  | -5.163100 | -2.241331 | -3.642739 |
| H  | -3.106575 | -3.596686 | -4.095759 |
| H  | 3.331165  | -1.584876 | 1.763372  |
| H  | 5.685283  | -1.818960 | 2.439682  |
| H  | 7.503667  | -1.801022 | 0.721606  |
| H  | 6.907395  | -1.550417 | -1.692298 |
| H  | 4.548051  | -1.349888 | -2.378346 |
| H  | 1.811195  | -3.747424 | -2.478471 |
| H  | 2.010856  | -4.174701 | -4.906428 |
| H  | 2.373858  | -2.276804 | -6.489585 |
| H  | 2.510738  | 0.056998  | -5.607983 |
| H  | 2.258420  | 0.489937  | -3.183072 |
| H  | -2.973503 | 2.139691  | -1.343063 |
| H  | -4.458365 | 3.991618  | -2.042588 |
| H  | -6.789741 | 4.148382  | -1.151066 |
| H  | -7.616564 | 2.419450  | 0.449155  |
| H  | -6.139376 | 0.559720  | 1.149244  |
| H  | -3.627752 | 0.386804  | 3.270676  |
| H  | -4.793104 | -0.809521 | 5.101813  |
| H  | -5.962343 | -2.971252 | 4.644328  |
| H  | -5.970699 | -3.899577 | 2.326939  |
| H  | -4.847536 | -2.678837 | 0.487795  |
| H  | -1.136942 | -3.397090 | -2.586891 |
| H  | -1.921312 | -4.082584 | 0.482386  |
| Pd | 1.052442  | 0.923154  | -0.220581 |
| C  | -0.261748 | -0.782787 | 3.918344  |
| C  | 0.265096  | -0.238298 | 2.764002  |
| C  | 1.551746  | 0.375856  | 2.740279  |
| C  | 2.301559  | 0.430462  | 3.974595  |
| C  | 1.723851  | -0.140139 | 5.146557  |
| C  | 0.477991  | -0.734083 | 5.123081  |
| H  | -1.251400 | -1.246071 | 3.899953  |

|    |           |           |           |
|----|-----------|-----------|-----------|
| H  | -0.310763 | -0.260550 | 1.835768  |
| C  | 2.099152  | 0.924656  | 1.527698  |
| C  | 3.593382  | 1.054853  | 3.995302  |
| H  | 2.279586  | -0.104427 | 6.085907  |
| H  | 0.060421  | -1.164057 | 6.038379  |
| C  | 4.081845  | 1.577286  | 2.812411  |
| C  | 3.353699  | 1.507576  | 1.598594  |
| H  | 5.064261  | 2.061134  | 2.807713  |
| H  | 3.814813  | 1.929556  | 0.701556  |
| Br | -0.439329 | 1.078616  | -2.341512 |
| C  | 4.395016  | 1.151977  | 5.270882  |
| H  | 3.858793  | 1.716316  | 6.053879  |
| H  | 4.623107  | 0.159288  | 5.698056  |
| H  | 5.352131  | 1.664075  | 5.090852  |
| C  | 1.220085  | 3.533025  | -0.062339 |
| H  | 2.104474  | 3.627655  | 0.578240  |
| C  | 0.144069  | 2.816589  | 0.475003  |
| H  | -0.818687 | 2.858389  | -0.038230 |
| H  | 0.107318  | 2.680924  | 1.559411  |
| C  | 1.246164  | 4.308521  | -1.267515 |
| H  | 0.446680  | 4.070027  | -1.980289 |
| H  | 2.235189  | 4.334995  | -1.749711 |
| B  | 1.048249  | 5.962591  | -0.783825 |
| F  | 1.117555  | 6.723494  | -1.951159 |
| F  | -0.188484 | 6.116664  | -0.159483 |
| F  | 2.093900  | 6.295268  | 0.086711  |

#### 47-ts

B3LYP SCF energy: -3024.28971445 a.u.

B3LYP enthalpy: -3023.404846 a.u.

B3LYP free energy: -3023.565630 a.u.

M06-L SCF energy in solution: -3026.24128944 a.u.

M06-L enthalpy in solution: -3025.356421 a.u.

M06-L free energy in solution: -3025.517205 a.u.

Imaginary frequency: -523.4720 cm<sup>-1</sup>

#### Cartesian coordinates

| ATOM | X         | Y        | Z        |
|------|-----------|----------|----------|
| P    | -1.878486 | 0.914401 | 0.784497 |
| C    | -2.265873 | 0.973402 | 2.600365 |
| C    | -1.197139 | 1.218222 | 3.484004 |
| C    | -3.541300 | 0.741046 | 3.139589 |
| C    | -1.403922 | 1.257694 | 4.864583 |
| H    | -0.191111 | 1.367193 | 3.081122 |
| C    | -3.745193 | 0.766250 | 4.524101 |
| H    | -4.383757 | 0.534247 | 2.476894 |
| C    | -2.680884 | 1.029305 | 5.389842 |
| H    | -0.562351 | 1.455598 | 5.533989 |

|   |           |           |           |
|---|-----------|-----------|-----------|
| H | -4.744340 | 0.577072  | 4.926028  |
| H | -2.842555 | 1.048846  | 6.470911  |
| C | -3.401834 | 0.215789  | 0.012954  |
| C | -4.584426 | 0.944494  | -0.205770 |
| C | -3.391595 | -1.127515 | -0.397392 |
| C | -5.705849 | 0.361987  | -0.790508 |
| H | -4.635262 | 1.998210  | 0.079457  |
| C | -4.503708 | -1.728667 | -0.980695 |
| H | -2.476770 | -1.711758 | -0.264627 |
| C | -5.700623 | -0.999010 | -1.192396 |
| H | -6.592855 | 0.977274  | -0.938409 |
| H | -4.430925 | -2.773141 | -1.281868 |
| C | -2.025632 | 2.703857  | 0.295050  |
| C | -1.839901 | 3.025774  | -1.062311 |
| C | -2.284349 | 3.745563  | 1.200130  |
| C | -1.933502 | 4.345316  | -1.504661 |
| H | -1.618814 | 2.232952  | -1.781854 |
| C | -2.365201 | 5.071687  | 0.757814  |
| H | -2.432349 | 3.525290  | 2.258959  |
| C | -2.196003 | 5.375874  | -0.594424 |
| H | -1.788005 | 4.572329  | -2.563849 |
| H | -2.569672 | 5.868788  | 1.478136  |
| H | -2.263089 | 6.411110  | -0.939318 |
| N | -6.810549 | -1.583795 | -1.771440 |
| C | -8.007660 | -0.801814 | -1.999428 |
| H | -7.825230 | 0.059060  | -2.669781 |
| H | -8.772446 | -1.433726 | -2.469096 |
| H | -8.432995 | -0.403780 | -1.059299 |
| C | -6.769739 | -2.973546 | -2.176441 |
| H | -6.555247 | -3.648334 | -1.327296 |
| H | -7.744060 | -3.261301 | -2.592050 |
| H | -6.003593 | -3.164109 | -2.951570 |
| P | 1.832154  | 0.337741  | -0.798484 |
| C | 1.875767  | -0.488779 | -2.463182 |
| C | 0.645005  | -0.693371 | -3.115956 |
| C | 3.047648  | -0.950665 | -3.083440 |
| C | 0.591097  | -1.319263 | -4.363239 |
| H | -0.278923 | -0.369179 | -2.628375 |
| C | 2.991701  | -1.589785 | -4.327857 |
| H | 4.013355  | -0.817299 | -2.592419 |
| C | 1.766463  | -1.772085 | -4.973497 |
| H | -0.374215 | -1.464320 | -4.855707 |
| H | 3.914594  | -1.947107 | -4.792905 |
| H | 1.725012  | -2.270922 | -5.945394 |
| C | 3.556687  | 0.169129  | -0.149934 |
| C | 4.647876  | 0.905368  | -0.647508 |
| C | 3.813944  | -0.710934 | 0.912675  |
| C | 5.931309  | 0.757569  | -0.129576 |
| H | 4.496125  | 1.621524  | -1.458766 |
| C | 5.090520  | -0.872562 | 1.446136  |
| H | 2.982809  | -1.277233 | 1.338550  |

|    |           |           |           |
|----|-----------|-----------|-----------|
| C  | 6.193194  | -0.143098 | 0.935421  |
| H  | 6.735165  | 1.357097  | -0.555434 |
| H  | 5.223509  | -1.567381 | 2.274580  |
| C  | 1.845523  | 2.140426  | -1.266906 |
| C  | 1.770529  | 3.080912  | -0.222946 |
| C  | 1.923682  | 2.610785  | -2.587428 |
| C  | 1.795157  | 4.449905  | -0.489268 |
| H  | 1.690193  | 2.733222  | 0.810915  |
| C  | 1.937155  | 3.985445  | -2.855305 |
| H  | 1.980910  | 1.903861  | -3.417503 |
| C  | 1.878404  | 4.908383  | -1.809197 |
| H  | 1.736373  | 5.163930  | 0.336256  |
| H  | 2.000068  | 4.332552  | -3.890543 |
| H  | 1.890714  | 5.981131  | -2.019129 |
| N  | 7.464100  | -0.293790 | 1.455874  |
| C  | 8.562856  | 0.487520  | 0.927247  |
| H  | 8.398961  | 1.575501  | 1.042629  |
| H  | 9.484993  | 0.230115  | 1.464083  |
| H  | 8.735303  | 0.291700  | -0.147383 |
| C  | 7.693407  | -1.205852 | 2.557086  |
| H  | 7.418855  | -2.245753 | 2.300579  |
| H  | 8.758792  | -1.198713 | 2.821097  |
| H  | 7.120773  | -0.926348 | 3.461578  |
| Pd | 0.073230  | -0.510352 | 0.504659  |
| N  | -1.068694 | -2.783350 | 2.410824  |
| N  | -2.144669 | -2.772973 | 2.712231  |
| C  | 0.304194  | -2.353808 | 1.369957  |
| Si | 0.507871  | -3.988722 | 0.384469  |
| C  | 0.417223  | -5.528280 | 1.496429  |
| H  | -0.570471 | -5.631404 | 1.975459  |
| H  | 0.598803  | -6.446147 | 0.910884  |
| H  | 1.173851  | -5.488939 | 2.298019  |
| C  | -0.832344 | -4.139831 | -0.941548 |
| H  | -1.839130 | -4.179854 | -0.493186 |
| H  | -0.798301 | -3.282430 | -1.631742 |
| H  | -0.695755 | -5.061092 | -1.532750 |
| C  | 2.218435  | -3.948674 | -0.419211 |
| H  | 3.017335  | -3.825556 | 0.329746  |
| H  | 2.398726  | -4.900507 | -0.947598 |
| H  | 2.309272  | -3.131465 | -1.149893 |
| H  | 1.025998  | -2.362276 | 2.208246  |

#### 48

B3LYP SCF energy: -2914.88247986 a.u.  
 B3LYP enthalpy: -2914.007157 a.u.  
 B3LYP free energy: -2914.161627 a.u.  
 M06-L SCF energy in solution: -2916.72038386 a.u.  
 M06-L enthalpy in solution: -2915.845061 a.u.

M06-L free energy in solution: -2915.999531 a.u.

#### Cartesian coordinates

| ATOM | X         | Y         | Z         |
|------|-----------|-----------|-----------|
| P    | -1.778282 | 0.851258  | 0.686030  |
| C    | -1.976367 | 1.216741  | 2.494947  |
| C    | -0.822976 | 1.260525  | 3.296649  |
| C    | -3.226837 | 1.434576  | 3.096395  |
| C    | -0.914801 | 1.538550  | 4.663299  |
| H    | 0.150294  | 1.048238  | 2.845333  |
| C    | -3.318810 | 1.705440  | 4.465295  |
| H    | -4.136914 | 1.385363  | 2.494425  |
| C    | -2.163733 | 1.762102  | 5.251078  |
| H    | -0.007846 | 1.567052  | 5.272991  |
| H    | -4.299631 | 1.868640  | 4.920144  |
| H    | -2.237747 | 1.970728  | 6.321713  |
| C    | -3.401625 | 0.116851  | 0.199469  |
| C    | -4.496941 | 0.872104  | -0.254334 |
| C    | -3.577713 | -1.274486 | 0.299344  |
| C    | -5.710913 | 0.275125  | -0.588130 |
| H    | -4.408671 | 1.955757  | -0.357066 |
| C    | -4.785414 | -1.885579 | -0.022415 |
| H    | -2.738128 | -1.889660 | 0.633918  |
| C    | -5.893949 | -1.126576 | -0.477737 |
| H    | -6.521801 | 0.912763  | -0.938654 |
| H    | -4.858842 | -2.968234 | 0.074425  |
| C    | -1.893022 | 2.537468  | -0.086155 |
| C    | -1.734465 | 2.628623  | -1.480898 |
| C    | -2.114018 | 3.717584  | 0.641559  |
| C    | -1.820602 | 3.859301  | -2.132691 |
| H    | -1.544257 | 1.724030  | -2.064487 |
| C    | -2.191042 | 4.953490  | -0.011372 |
| H    | -2.233273 | 3.677331  | 1.725605  |
| C    | -2.050423 | 5.028429  | -1.398559 |
| H    | -1.698416 | 3.907633  | -3.217807 |
| H    | -2.365483 | 5.861683  | 0.572116  |
| H    | -2.112701 | 5.993909  | -1.907390 |
| N    | -7.094695 | -1.726580 | -0.803218 |
| C    | -8.198625 | -0.925471 | -1.288852 |
| H    | -7.952747 | -0.395344 | -2.228341 |
| H    | -9.060717 | -1.574891 | -1.488311 |
| H    | -8.516999 | -0.163290 | -0.553496 |
| C    | -7.241423 | -3.163523 | -0.692675 |
| H    | -7.070784 | -3.520826 | 0.339509  |
| H    | -8.261778 | -3.448952 | -0.979313 |
| H    | -6.540963 | -3.709909 | -1.351812 |
| P    | 1.801348  | 0.352856  | -0.720615 |
| C    | 1.912753  | -0.366517 | -2.427932 |
| C    | 0.715468  | -0.631922 | -3.115430 |
| C    | 3.132410  | -0.670557 | -3.054356 |
| C    | 0.736743  | -1.165344 | -4.406735 |

|    |           |           |           |
|----|-----------|-----------|-----------|
| H  | -0.240447 | -0.438895 | -2.621582 |
| C  | 3.152840  | -1.212779 | -4.343730 |
| H  | 4.073530  | -0.489494 | -2.531122 |
| C  | 1.957060  | -1.456867 | -5.024934 |
| H  | -0.204042 | -1.366962 | -4.925547 |
| H  | 4.110434  | -1.448170 | -4.815997 |
| H  | 1.975140  | -1.882411 | -6.031753 |
| C  | 3.452859  | 0.004270  | 0.030048  |
| C  | 4.576628  | 0.826239  | -0.170792 |
| C  | 3.628263  | -1.137781 | 0.829866  |
| C  | 5.816099  | 0.522906  | 0.386936  |
| H  | 4.490300  | 1.731359  | -0.775836 |
| C  | 4.860742  | -1.458389 | 1.390632  |
| H  | 2.768341  | -1.785327 | 1.019833  |
| C  | 5.997293  | -0.635643 | 1.184876  |
| H  | 6.648568  | 1.199967  | 0.198826  |
| H  | 4.932198  | -2.356079 | 2.003459  |
| C  | 1.933487  | 2.178790  | -1.038071 |
| C  | 1.819530  | 3.042312  | 0.066576  |
| C  | 2.135993  | 2.738089  | -2.309669 |
| C  | 1.927331  | 4.424292  | -0.092091 |
| H  | 1.646948  | 2.627002  | 1.063220  |
| C  | 2.234715  | 4.125244  | -2.469579 |
| H  | 2.224895  | 2.091134  | -3.184243 |
| C  | 2.135184  | 4.971465  | -1.363386 |
| H  | 1.839326  | 5.078528  | 0.779113  |
| H  | 2.394432  | 4.543272  | -3.467325 |
| H  | 2.213227  | 6.054455  | -1.489590 |
| N  | 7.222858  | -0.943969 | 1.741845  |
| C  | 8.358715  | -0.072013 | 1.525931  |
| H  | 8.184437  | 0.948755  | 1.914903  |
| H  | 9.236023  | -0.480620 | 2.043696  |
| H  | 8.615899  | 0.022436  | 0.454415  |
| C  | 7.371508  | -2.131898 | 2.557608  |
| H  | 7.127722  | -3.054517 | 1.999285  |
| H  | 8.412237  | -2.213129 | 2.896778  |
| H  | 6.726067  | -2.108748 | 3.455636  |
| Pd | 0.028940  | -0.696033 | 0.440161  |
| C  | 0.165737  | -2.519610 | 1.079986  |
| Si | -0.106191 | -4.180325 | 0.247242  |
| C  | -1.241354 | -5.260374 | 1.332700  |
| H  | -2.229624 | -4.791883 | 1.473593  |
| H  | -1.402577 | -6.250291 | 0.871593  |
| H  | -0.803950 | -5.419980 | 2.332254  |
| C  | -0.896942 | -4.027717 | -1.467988 |
| H  | -1.871106 | -3.514785 | -1.411364 |
| H  | -0.253980 | -3.443666 | -2.146361 |
| H  | -1.059565 | -5.019842 | -1.923257 |
| C  | 1.562654  | -5.079892 | 0.057543  |
| H  | 2.038797  | -5.249880 | 1.037526  |
| H  | 1.427445  | -6.061820 | -0.428318 |

|   |          |           |           |
|---|----------|-----------|-----------|
| H | 2.262059 | -4.493069 | -0.560343 |
| H | 0.574880 | -2.680646 | 2.101263  |

#### 49

B3LYP SCF energy: -4743.43963104 a.u.

B3LYP enthalpy: -4742.756602 a.u.

B3LYP free energy: -4742.884963 a.u.

M06-L SCF energy in solution: -4744.99603430 a.u.

M06-L enthalpy in solution: -4744.313005 a.u.

M06-L free energy in solution: -4744.441366 a.u.

#### Cartesian coordinates

| ATOM | X         | Y         | Z         |
|------|-----------|-----------|-----------|
| P    | -1.198526 | 1.100397  | -0.046440 |
| C    | -1.446842 | 2.414110  | 1.239125  |
| C    | -0.348469 | 3.214325  | 1.592336  |
| C    | -2.687650 | 2.662004  | 1.853429  |
| C    | -0.485739 | 4.246170  | 2.524445  |
| H    | 0.621153  | 3.015790  | 1.131627  |
| C    | -2.822078 | 3.689381  | 2.792442  |
| H    | -3.554807 | 2.047576  | 1.603170  |
| C    | -1.723211 | 4.485328  | 3.129099  |
| H    | 0.381391  | 4.858416  | 2.785271  |
| H    | -3.793027 | 3.868099  | 3.262147  |
| H    | -1.830059 | 5.286671  | 3.864850  |
| C    | -2.618865 | -0.040139 | 0.229423  |
| C    | -3.468091 | -0.461930 | -0.807109 |
| C    | -2.805903 | -0.636290 | 1.491430  |
| C    | -4.460079 | -1.418679 | -0.600085 |
| H    | -3.359268 | -0.038123 | -1.807558 |
| C    | -3.797469 | -1.585028 | 1.718128  |
| H    | -2.165900 | -0.346573 | 2.329568  |
| C    | -4.658691 | -2.010138 | 0.672276  |
| H    | -5.085883 | -1.703260 | -1.444982 |
| H    | -3.898369 | -2.000954 | 2.719919  |
| C    | -1.655750 | 1.956111  | -1.628280 |
| C    | -0.969351 | 1.616840  | -2.805732 |
| C    | -2.675106 | 2.921905  | -1.689495 |
| C    | -1.304418 | 2.221974  | -4.021656 |
| H    | -0.161467 | 0.881485  | -2.763697 |
| C    | -3.002179 | 3.531121  | -2.903467 |
| H    | -3.214153 | 3.209782  | -0.784692 |
| C    | -2.319179 | 3.180962  | -4.073044 |
| H    | -0.762140 | 1.945949  | -4.929687 |
| H    | -3.792576 | 4.285722  | -2.934622 |
| H    | -2.575170 | 3.659993  | -5.021797 |
| N    | -5.640508 | -2.956274 | 0.885962  |
| C    | -6.482491 | -3.386545 | -0.211734 |

|    |           |           |           |
|----|-----------|-----------|-----------|
| H  | -5.900518 | -3.848376 | -1.031282 |
| H  | -7.201135 | -4.132772 | 0.150365  |
| H  | -7.059324 | -2.549262 | -0.645683 |
| C  | -5.792414 | -3.564429 | 2.191960  |
| H  | -6.029317 | -2.819384 | 2.973802  |
| H  | -6.616737 | -4.288362 | 2.163231  |
| H  | -4.881646 | -4.104200 | 2.512763  |
| Pd | 0.998594  | 0.238988  | -0.262495 |
| C  | 2.321823  | 1.586933  | -0.682310 |
| Si | 3.580425  | 2.420920  | 0.441276  |
| C  | 5.274529  | 1.979890  | -0.303019 |
| H  | 5.372888  | 2.363107  | -1.331844 |
| H  | 6.084690  | 2.421937  | 0.302215  |
| H  | 5.424393  | 0.888958  | -0.330762 |
| C  | 3.430498  | 4.320336  | 0.468291  |
| H  | 4.226593  | 4.766937  | 1.089068  |
| H  | 3.522191  | 4.736846  | -0.548526 |
| H  | 2.463288  | 4.656508  | 0.876481  |
| C  | 3.498590  | 1.770626  | 2.217702  |
| H  | 2.521408  | 1.978317  | 2.683160  |
| H  | 3.644979  | 0.678372  | 2.226115  |
| H  | 4.279153  | 2.227949  | 2.849274  |
| H  | 2.312754  | 2.064883  | -1.684107 |
| C  | 5.048506  | -2.957462 | -0.656102 |
| C  | 3.787771  | -2.616730 | -1.119068 |
| C  | 2.707825  | -2.417685 | -0.229222 |
| C  | 2.924716  | -2.597007 | 1.178873  |
| C  | 4.228469  | -2.939569 | 1.616783  |
| C  | 5.273614  | -3.115701 | 0.723695  |
| H  | 5.867506  | -3.099516 | -1.365719 |
| H  | 3.617363  | -2.483537 | -2.187859 |
| C  | 1.377243  | -2.037298 | -0.672869 |
| C  | 1.826288  | -2.442062 | 2.114247  |
| H  | 4.414617  | -3.069727 | 2.683812  |
| H  | 6.268175  | -3.380089 | 1.091732  |
| C  | 0.574003  | -2.158915 | 1.629153  |
| C  | 0.306037  | -1.967248 | 0.233727  |
| H  | -0.269813 | -2.095276 | 2.320822  |
| H  | -0.723147 | -2.005143 | -0.120224 |
| Br | 0.922376  | -2.269844 | -2.545797 |
| C  | 2.050176  | -2.628685 | 3.593308  |
| H  | 2.439359  | -3.634240 | 3.827287  |
| H  | 2.780745  | -1.903089 | 3.989965  |
| H  | 1.112153  | -2.494076 | 4.151013  |

### 50-ts

B3LYP SCF energy: -4743.42051901 a.u.  
 B3LYP enthalpy: -4742.739234 a.u.  
 B3LYP free energy: -4742.867792 a.u.

M06-L SCF energy in solution: -4744.98039244 a.u.

M06-L enthalpy in solution: -4744.299107 a.u.

M06-L free energy in solution: -4744.427665 a.u.

Imaginary frequency: -198.0900 cm<sup>-1</sup>

### Cartesian coordinates

| ATOM | X         | Y         | Z         |
|------|-----------|-----------|-----------|
| P    | 1.448642  | 0.739423  | 0.559289  |
| C    | 2.092175  | 2.341473  | -0.114102 |
| C    | 1.540659  | 3.545411  | 0.361079  |
| C    | 3.103321  | 2.395787  | -1.084900 |
| C    | 2.004771  | 4.773473  | -0.109902 |
| H    | 0.740321  | 3.522172  | 1.105345  |
| C    | 3.556029  | 3.630010  | -1.568348 |
| H    | 3.544961  | 1.473300  | -1.466481 |
| C    | 3.013882  | 4.819889  | -1.079960 |
| H    | 1.569331  | 5.699842  | 0.273191  |
| H    | 4.341495  | 3.655807  | -2.328208 |
| H    | 3.371016  | 5.782344  | -1.455037 |
| C    | 2.559134  | -0.537160 | -0.149840 |
| C    | 3.789133  | -0.903248 | 0.423134  |
| C    | 2.173686  | -1.195559 | -1.331448 |
| C    | 4.604236  | -1.870557 | -0.157233 |
| H    | 4.123787  | -0.430651 | 1.348939  |
| C    | 2.981414  | -2.156142 | -1.930252 |
| H    | 1.212586  | -0.953832 | -1.793161 |
| C    | 4.226760  | -2.525429 | -1.358333 |
| H    | 5.543160  | -2.120043 | 0.335235  |
| H    | 2.630585  | -2.633112 | -2.844236 |
| C    | 1.937129  | 0.846305  | 2.343799  |
| C    | 1.230937  | 0.082951  | 3.288707  |
| C    | 3.003556  | 1.650974  | 2.782696  |
| C    | 1.589331  | 0.115323  | 4.639071  |
| H    | 0.394607  | -0.539116 | 2.964295  |
| C    | 3.358404  | 1.683115  | 4.134602  |
| H    | 3.557994  | 2.263453  | 2.068992  |
| C    | 2.653256  | 0.915221  | 5.065863  |
| H    | 1.028011  | -0.483562 | 5.360795  |
| H    | 4.188942  | 2.314925  | 4.460386  |
| H    | 2.929200  | 0.944892  | 6.123162  |
| N    | 5.030160  | -3.482743 | -1.940270 |
| C    | 6.284782  | -3.855454 | -1.317900 |
| H    | 6.141906  | -4.266083 | -0.301119 |
| H    | 6.776719  | -4.627071 | -1.923559 |
| H    | 6.980033  | -2.999670 | -1.236058 |
| C    | 4.609353  | -4.139892 | -3.161940 |
| H    | 4.461762  | -3.422373 | -3.989779 |
| H    | 5.380374  | -4.855404 | -3.474694 |
| H    | 3.663661  | -4.698447 | -3.033312 |
| Pd   | -0.831269 | 0.247419  | 0.208820  |

|    |           |           |           |
|----|-----------|-----------|-----------|
| C  | -1.581994 | 1.903633  | -0.449035 |
| Si | -1.666821 | 2.464083  | -2.241226 |
| C  | -3.524558 | 2.504249  | -2.650826 |
| H  | -4.067864 | 3.191627  | -1.981785 |
| H  | -3.681628 | 2.847077  | -3.688302 |
| H  | -3.969026 | 1.502925  | -2.539608 |
| C  | -0.967347 | 4.199976  | -2.585975 |
| H  | -1.137598 | 4.489672  | -3.637824 |
| H  | -1.452810 | 4.958152  | -1.948574 |
| H  | 0.116571  | 4.247576  | -2.394999 |
| C  | -0.803221 | 1.236795  | -3.400153 |
| H  | 0.282317  | 1.206343  | -3.210098 |
| H  | -1.203780 | 0.220123  | -3.262185 |
| H  | -0.949775 | 1.524260  | -4.455180 |
| H  | -1.649411 | 2.728949  | 0.288224  |
| C  | -4.785504 | -0.545451 | 2.869297  |
| C  | -3.627916 | -0.850754 | 2.179754  |
| C  | -3.649569 | -1.153817 | 0.795884  |
| C  | -4.909305 | -1.138865 | 0.097517  |
| C  | -6.078747 | -0.815495 | 0.842919  |
| C  | -6.024347 | -0.527272 | 2.192295  |
| H  | -4.740865 | -0.316403 | 3.936958  |
| H  | -2.669097 | -0.862966 | 2.699694  |
| C  | -2.460626 | -1.431183 | 0.032639  |
| C  | -4.969066 | -1.449650 | -1.305482 |
| H  | -7.043149 | -0.797070 | 0.332880  |
| H  | -6.941125 | -0.284814 | 2.736125  |
| C  | -3.795303 | -1.807014 | -1.950067 |
| C  | -2.550182 | -1.845841 | -1.290573 |
| H  | -3.827223 | -2.075636 | -3.010246 |
| H  | -1.656825 | -2.157946 | -1.833315 |
| Br | -0.836849 | -2.318220 | 1.070918  |
| C  | -6.279417 | -1.432374 | -2.050845 |
| H  | -7.005010 | -2.150776 | -1.630898 |
| H  | -6.759739 | -0.439387 | -2.017516 |
| H  | -6.130595 | -1.692541 | -3.109057 |

## 51

B3LYP SCF energy: -4743.57313384 a.u.

B3LYP enthalpy: -4742.886541 a.u.

B3LYP free energy: -4743.011671 a.u.

M06-L SCF energy in solution: -4745.13207676 a.u.

M06-L enthalpy in solution: -4744.445484 a.u.

M06-L free energy in solution: -4744.570614 a.u.

Cartesian coordinates

| ATOM | X         | Y        | Z        |
|------|-----------|----------|----------|
| P    | -0.961364 | 0.585274 | 0.656689 |

|    |           |           |           |
|----|-----------|-----------|-----------|
| C  | -0.942887 | -0.021163 | 2.408279  |
| C  | 0.206709  | 0.205410  | 3.188445  |
| C  | -2.019273 | -0.715155 | 2.979655  |
| C  | 0.273509  | -0.246792 | 4.507298  |
| H  | 1.052824  | 0.751991  | 2.763256  |
| C  | -1.948346 | -1.174191 | 4.300679  |
| H  | -2.919937 | -0.901671 | 2.392250  |
| C  | -0.804931 | -0.942506 | 5.067693  |
| H  | 1.170890  | -0.055192 | 5.101659  |
| H  | -2.795806 | -1.715394 | 4.729337  |
| H  | -0.751886 | -1.299528 | 6.099392  |
| C  | -2.659236 | 0.250837  | 0.062863  |
| C  | -3.769131 | 1.013363  | 0.466165  |
| C  | -2.888473 | -0.806485 | -0.832842 |
| C  | -5.052760 | 0.724292  | 0.015566  |
| H  | -3.635176 | 1.863023  | 1.139812  |
| C  | -4.166867 | -1.114070 | -1.286815 |
| H  | -2.042660 | -1.390407 | -1.202576 |
| C  | -5.292613 | -0.356459 | -0.873713 |
| H  | -5.874145 | 1.355249  | 0.353084  |
| H  | -4.281515 | -1.939052 | -1.988426 |
| C  | -0.888263 | 2.425319  | 0.891036  |
| C  | -0.515734 | 3.244422  | -0.189130 |
| C  | -1.233571 | 3.028334  | 2.114600  |
| C  | -0.490755 | 4.634176  | -0.043497 |
| H  | -0.253149 | 2.791908  | -1.148889 |
| C  | -1.205061 | 4.419137  | 2.253877  |
| H  | -1.523884 | 2.415723  | 2.969612  |
| C  | -0.832375 | 5.226230  | 1.175678  |
| H  | -0.198341 | 5.255718  | -0.893768 |
| H  | -1.474985 | 4.870814  | 3.212259  |
| H  | -0.807175 | 6.313533  | 1.286599  |
| N  | -6.563001 | -0.648981 | -1.323160 |
| C  | -7.683512 | 0.179290  | -0.925559 |
| H  | -7.572656 | 1.227975  | -1.260195 |
| H  | -8.605672 | -0.218164 | -1.368259 |
| H  | -7.818936 | 0.193140  | 0.171233  |
| C  | -6.767502 | -1.723858 | -2.274026 |
| H  | -6.431460 | -2.698045 | -1.875035 |
| H  | -7.837678 | -1.809904 | -2.501440 |
| H  | -6.231879 | -1.551653 | -3.226280 |
| Pd | 0.736164  | -0.234823 | -0.729310 |
| C  | 1.762142  | -1.604835 | 0.539322  |
| Si | 1.121334  | -3.396443 | 0.412715  |
| C  | 0.758665  | -4.015618 | -1.340770 |
| H  | 1.670428  | -4.109161 | -1.951862 |
| H  | 0.305836  | -5.019718 | -1.275917 |
| H  | 0.051091  | -3.363940 | -1.877826 |
| C  | 2.471689  | -4.501090 | 1.162414  |
| H  | 2.157421  | -5.558845 | 1.165098  |
| H  | 3.410090  | -4.429221 | 0.588304  |

|    |           |           |           |
|----|-----------|-----------|-----------|
| H  | 2.693826  | -4.215833 | 2.203997  |
| C  | -0.447419 | -3.581411 | 1.446587  |
| H  | -0.303424 | -3.225449 | 2.478541  |
| H  | -1.290146 | -3.019815 | 1.014465  |
| H  | -0.739811 | -4.644094 | 1.494640  |
| H  | 1.800809  | -1.318072 | 1.597194  |
| C  | 5.177700  | 0.714545  | 2.119384  |
| C  | 4.154526  | -0.082441 | 1.631049  |
| C  | 3.896710  | -0.190250 | 0.244470  |
| C  | 4.734362  | 0.526432  | -0.670130 |
| C  | 5.770740  | 1.337179  | -0.139472 |
| C  | 5.989434  | 1.435011  | 1.224508  |
| H  | 5.356342  | 0.777359  | 3.195707  |
| H  | 3.542233  | -0.651094 | 2.332278  |
| C  | 2.824916  | -1.046019 | -0.268963 |
| C  | 4.523371  | 0.417449  | -2.101964 |
| H  | 6.412960  | 1.896511  | -0.820826 |
| H  | 6.796895  | 2.066619  | 1.603602  |
| C  | 3.530067  | -0.407776 | -2.561709 |
| C  | 2.688047  | -1.149198 | -1.679315 |
| H  | 3.361165  | -0.508062 | -3.635945 |
| H  | 2.051591  | -1.920489 | -2.112000 |
| Br | -0.049684 | 0.855891  | -2.882356 |
| C  | 5.387078  | 1.189555  | -3.065250 |
| H  | 5.305534  | 2.277292  | -2.900499 |
| H  | 6.454208  | 0.928364  | -2.963047 |
| H  | 5.088661  | 0.987208  | -4.103516 |

## 52

B3LYP SCF energy: -1854.72455282 a.u.  
 B3LYP enthalpy: -1854.206661 a.u.  
 B3LYP free energy: -1854.316673 a.u.  
 M06-L SCF energy in solution: -1855.86700598 a.u.  
 M06-L enthalpy in solution: -1855.349114 a.u.  
 M06-L free energy in solution: -1855.459126 a.u.

### Cartesian coordinates

| ATOM | X         | Y         | Z         |
|------|-----------|-----------|-----------|
| P    | -0.430662 | -0.916609 | -0.038143 |
| C    | -1.078626 | -2.134162 | -1.284220 |
| C    | -0.212679 | -3.158711 | -1.707913 |
| C    | -2.367543 | -2.070202 | -1.836560 |
| C    | -0.632201 | -4.107089 | -2.642659 |
| H    | 0.803312  | -3.200170 | -1.304637 |
| C    | -2.783355 | -3.013981 | -2.783195 |
| H    | -3.052513 | -1.276323 | -1.531772 |
| C    | -1.920322 | -4.036068 | -3.185660 |
| H    | 0.052887  | -4.898928 | -2.957455 |

|    |           |           |           |
|----|-----------|-----------|-----------|
| H  | -3.788952 | -2.947040 | -3.207452 |
| H  | -2.246398 | -4.771997 | -3.925474 |
| C  | -1.719738 | 0.402077  | -0.004752 |
| C  | -2.887552 | 0.351050  | 0.774263  |
| C  | -1.532619 | 1.540749  | -0.807527 |
| C  | -3.828029 | 1.379173  | 0.752762  |
| H  | -3.072993 | -0.507970 | 1.423399  |
| C  | -2.464908 | 2.573104  | -0.849264 |
| H  | -0.623856 | 1.618399  | -1.411920 |
| C  | -3.645961 | 2.523379  | -0.064803 |
| H  | -4.710753 | 1.287410  | 1.384718  |
| H  | -2.263751 | 3.429259  | -1.492245 |
| C  | -0.721048 | -1.805178 | 1.569009  |
| C  | -0.076743 | -1.306759 | 2.715447  |
| C  | -1.537335 | -2.940662 | 1.696162  |
| C  | -0.256823 | -1.916181 | 3.958601  |
| H  | 0.580158  | -0.437514 | 2.621606  |
| C  | -1.708711 | -3.558261 | 2.940577  |
| H  | -2.041010 | -3.352315 | 0.819144  |
| C  | -1.072813 | -3.047164 | 4.074548  |
| H  | 0.251221  | -1.513893 | 4.839230  |
| H  | -2.343358 | -4.445022 | 3.020892  |
| H  | -1.206027 | -3.531959 | 5.045336  |
| N  | -4.573467 | 3.547170  | -0.092062 |
| C  | -5.767671 | 3.467852  | 0.723198  |
| H  | -5.535735 | 3.409055  | 1.803188  |
| H  | -6.379470 | 4.364752  | 0.562016  |
| H  | -6.388945 | 2.588328  | 0.470645  |
| C  | -4.351124 | 4.704715  | -0.933152 |
| H  | -4.275518 | 4.436323  | -2.003401 |
| H  | -5.191467 | 5.402220  | -0.823697 |
| H  | -3.426470 | 5.248354  | -0.662882 |
| Pd | 1.691795  | -0.207333 | -0.419718 |
| C  | 3.691557  | 0.537196  | -0.893963 |
| N  | 4.548039  | -0.456397 | -0.649617 |
| N  | 5.296494  | -1.267208 | -0.400193 |
| Si | 3.936799  | 2.143655  | 0.127625  |
| C  | 5.642817  | 2.860585  | -0.286283 |
| H  | 5.725316  | 3.114724  | -1.355989 |
| H  | 5.829233  | 3.781674  | 0.292117  |
| H  | 6.451381  | 2.150043  | -0.045999 |
| C  | 2.598954  | 3.360300  | -0.396960 |
| H  | 2.759672  | 4.336760  | 0.091039  |
| H  | 2.614559  | 3.523779  | -1.487121 |
| H  | 1.599693  | 2.989007  | -0.122235 |
| C  | 3.866077  | 1.741803  | 1.967558  |
| H  | 2.870779  | 1.359959  | 2.242470  |
| H  | 4.611213  | 0.977765  | 2.244970  |
| H  | 4.076193  | 2.643481  | 2.567593  |
| H  | 3.544670  | 0.646776  | -1.981846 |

**53-ts**

B3LYP SCF energy: -1854.68989856 a.u.  
 B3LYP enthalpy: -1854.174480 a.u.  
 B3LYP free energy: -1854.285653 a.u.  
 M06-L SCF energy in solution: -1855.83052113 a.u.  
 M06-L enthalpy in solution: -1855.315103 a.u.  
 M06-L free energy in solution: -1855.426276 a.u.  
 Imaginary frequency: -422.6797 cm<sup>-1</sup>

## Cartesian coordinates

| ATOM | X         | Y         | Z         |
|------|-----------|-----------|-----------|
| P    | 0.471895  | 0.672215  | -0.060089 |
| C    | 0.833848  | 2.054160  | -1.244004 |
| C    | -0.232784 | 2.896282  | -1.610310 |
| C    | 2.094761  | 2.270959  | -1.820978 |
| C    | -0.036098 | 3.943114  | -2.512629 |
| H    | -1.226262 | 2.720011  | -1.187894 |
| C    | 2.287612  | 3.314145  | -2.734251 |
| H    | 2.931891  | 1.620355  | -1.560219 |
| C    | 1.226214  | 4.154192  | -3.079251 |
| H    | -0.874327 | 4.590459  | -2.783750 |
| H    | 3.275088  | 3.468276  | -3.177681 |
| H    | 1.378639  | 4.967907  | -3.793195 |
| C    | 2.028640  | -0.304692 | 0.004393  |
| C    | 3.155176  | 0.057768  | 0.762318  |
| C    | 2.107958  | -1.492180 | -0.743036 |
| C    | 4.312492  | -0.716421 | 0.767092  |
| H    | 3.133227  | 0.962937  | 1.374244  |
| C    | 3.258796  | -2.274600 | -0.755484 |
| H    | 1.236105  | -1.814519 | -1.320219 |
| C    | 4.401768  | -1.906858 | -0.000042 |
| H    | 5.151882  | -0.390559 | 1.380309  |
| H    | 3.259686  | -3.186613 | -1.351230 |
| C    | 0.451253  | 1.529328  | 1.584605  |
| C    | -0.085778 | 0.827540  | 2.678937  |
| C    | 0.942102  | 2.828476  | 1.790151  |
| C    | -0.117701 | 1.405434  | 3.949593  |
| H    | -0.487981 | -0.177542 | 2.524282  |
| C    | 0.899957  | 3.410639  | 3.062417  |
| H    | 1.356013  | 3.394972  | 0.953269  |
| C    | 0.373313  | 2.701362  | 4.144585  |
| H    | -0.536614 | 0.845380  | 4.789894  |
| H    | 1.281762  | 4.425171  | 3.205450  |
| H    | 0.340155  | 3.158181  | 5.137210  |
| N    | 5.547995  | -2.677581 | -0.003788 |
| C    | 6.679317  | -2.301873 | 0.819070  |
| H    | 6.431307  | -2.286899 | 1.897424  |
| H    | 7.492521  | -3.024390 | 0.672670  |

|    |           |           |           |
|----|-----------|-----------|-----------|
| H  | 7.070015  | -1.302074 | 0.555550  |
| C  | 5.590760  | -3.911673 | -0.761268 |
| H  | 5.409682  | -3.742816 | -1.838254 |
| H  | 6.584138  | -4.367327 | -0.659647 |
| H  | 4.843549  | -4.649008 | -0.411128 |
| Pd | -1.468945 | -0.518418 | -0.589414 |
| C  | -3.065183 | -1.699584 | -0.507638 |
| N  | -3.902163 | -1.609880 | -2.182993 |
| N  | -4.229145 | -1.166769 | -3.146789 |
| Si | -4.539481 | -1.325487 | 0.653277  |
| C  | -6.015815 | -2.481326 | 0.355660  |
| H  | -5.725233 | -3.539563 | 0.464518  |
| H  | -6.825755 | -2.281208 | 1.077988  |
| H  | -6.436768 | -2.352106 | -0.655376 |
| C  | -3.859451 | -1.633608 | 2.392346  |
| H  | -4.664089 | -1.517483 | 3.138414  |
| H  | -3.451089 | -2.652449 | 2.492866  |
| H  | -3.057675 | -0.919221 | 2.633243  |
| C  | -5.101586 | 0.465486  | 0.457908  |
| H  | -4.261159 | 1.152716  | 0.643153  |
| H  | -5.480253 | 0.662685  | -0.558752 |
| H  | -5.912036 | 0.704614  | 1.166989  |
| H  | -2.884868 | -2.785878 | -0.607754 |

**54**

B3LYP SCF energy: -1745.26662837 a.u.  
 B3LYP enthalpy: -1744.761188 a.u.  
 B3LYP free energy: -1744.865926 a.u.  
 M06-L SCF energy in solution: -1746.30185416 a.u.  
 M06-L enthalpy in solution: -1745.796414 a.u.  
 M06-L free energy in solution: -1745.901152 a.u.

## Cartesian coordinates

| ATOM | X         | Y         | Z         |
|------|-----------|-----------|-----------|
| P    | 0.209190  | 0.694573  | -0.105335 |
| C    | 0.669212  | 2.335663  | -0.829393 |
| C    | -0.366119 | 3.260824  | -1.066531 |
| C    | 1.976645  | 2.666934  | -1.219138 |
| C    | -0.093968 | 4.495789  | -1.657601 |
| H    | -1.393371 | 3.008583  | -0.787319 |
| C    | 2.244822  | 3.902537  | -1.818758 |
| H    | 2.790101  | 1.957421  | -1.054976 |
| C    | 1.213796  | 4.819891  | -2.036483 |
| H    | -0.907716 | 5.204634  | -1.831293 |
| H    | 3.267751  | 4.147120  | -2.117190 |
| H    | 1.426139  | 5.783738  | -2.506266 |
| C    | 1.773659  | -0.257309 | -0.024631 |
| C    | 2.747635  | -0.073643 | 0.972273  |



|    |           |           |           |
|----|-----------|-----------|-----------|
| C  | 2.027404  | -1.229139 | -1.007893 |
| C  | 3.926643  | -0.812610 | 0.983854  |
| H  | 2.584827  | 0.657404  | 1.768067  |
| C  | 3.203651  | -1.972127 | -1.015004 |
| H  | 1.274731  | -1.416217 | -1.779592 |
| C  | 4.194105  | -1.784339 | -0.016390 |
| H  | 4.642637  | -0.632954 | 1.785010  |
| H  | 3.342767  | -2.713831 | -1.800501 |
| C  | -0.165424 | 1.083816  | 1.663114  |
| C  | -0.869153 | 0.125276  | 2.413459  |
| C  | 0.232198  | 2.277056  | 2.287606  |
| C  | -1.156160 | 0.349981  | 3.761463  |
| H  | -1.199976 | -0.797800 | 1.930084  |
| C  | -0.064728 | 2.503955  | 3.636055  |
| H  | 0.771632  | 3.038501  | 1.720265  |
| C  | -0.756282 | 1.541634  | 4.376086  |
| H  | -1.703581 | -0.404844 | 4.331973  |
| H  | 0.246853  | 3.439519  | 4.108093  |
| H  | -0.989317 | 1.721394  | 5.428821  |
| N  | 5.361487  | -2.518867 | -0.012174 |
| C  | 6.331443  | -2.337518 | 1.048940  |
| H  | 5.916316  | -2.581272 | 2.044993  |
| H  | 7.190585  | -2.997502 | 0.873986  |
| H  | 6.710381  | -1.300152 | 1.092013  |
| C  | 5.587708  | -3.528527 | -1.027072 |
| H  | 5.579024  | -3.100340 | -2.045745 |
| H  | 6.570687  | -3.990176 | -0.869166 |
| H  | 4.828433  | -4.332450 | -0.997933 |
| Pd | -1.535248 | -0.330667 | -1.290366 |
| C  | -2.811827 | -1.748211 | -1.121356 |
| Si | -4.419326 | -1.760477 | -0.140479 |
| C  | -5.719780 | -2.586250 | -1.257002 |
| H  | -5.437704 | -3.621482 | -1.509220 |
| H  | -6.698156 | -2.615301 | -0.747342 |
| H  | -5.847314 | -2.030309 | -2.199874 |
| C  | -4.240833 | -2.783579 | 1.454608  |
| H  | -5.197083 | -2.817869 | 2.004657  |
| H  | -3.937347 | -3.820526 | 1.235936  |
| H  | -3.486135 | -2.346946 | 2.129521  |
| C  | -5.001730 | -0.020265 | 0.314250  |
| H  | -4.259223 | 0.487859  | 0.951047  |
| H  | -5.136409 | 0.592552  | -0.591858 |
| H  | -5.960773 | -0.043988 | 0.859386  |
| H  | -2.462542 | -2.782937 | -1.323539 |

## 55

B3LYP SCF energy: -4852.92384007 a.u.  
 B3LYP enthalpy: -4852.227664 a.u.  
 B3LYP free energy: -4852.359732 a.u.

M06-L SCF energy in solution: -4854.59698824 a.u.

M06-L enthalpy in solution: -4853.900812 a.u.

M06-L free energy in solution: -4854.032880 a.u.

## Cartesian coordinates

| ATOM | X         | Y         | Z         |
|------|-----------|-----------|-----------|
| P    | -0.074396 | 1.300116  | 0.054704  |
| C    | 0.320374  | 1.980229  | 1.731183  |
| C    | 1.455901  | 1.521638  | 2.416380  |
| C    | -0.501771 | 2.939414  | 2.350788  |
| C    | 1.778206  | 2.021841  | 3.681589  |
| H    | 2.081787  | 0.753599  | 1.959622  |
| C    | -0.178151 | 3.440467  | 3.614289  |
| H    | -1.407710 | 3.286429  | 1.849440  |
| C    | 0.963499  | 2.985252  | 4.281764  |
| H    | 2.663614  | 1.648898  | 4.202753  |
| H    | -0.826328 | 4.185526  | 4.082918  |
| H    | 1.211143  | 3.373908  | 5.272846  |
| C    | -1.908671 | 1.333273  | 0.033031  |
| C    | -2.652001 | 2.037878  | -0.925865 |
| C    | -2.622297 | 0.595578  | 0.995771  |
| C    | -4.045220 | 2.017264  | -0.927397 |
| H    | -2.143685 | 2.620496  | -1.696154 |
| C    | -4.010729 | 0.569135  | 1.009330  |
| H    | -2.087121 | 0.022240  | 1.756024  |
| C    | -4.769225 | 1.281354  | 0.043161  |
| H    | -4.568592 | 2.581491  | -1.698100 |
| H    | -4.506982 | -0.023962 | 1.775973  |
| C    | 0.387948  | 2.637929  | -1.141199 |
| C    | 0.595673  | 2.271398  | -2.483560 |
| C    | 0.518297  | 3.988204  | -0.779879 |
| C    | 0.913588  | 3.235985  | -3.443691 |
| H    | 0.516028  | 1.220620  | -2.776660 |
| C    | 0.843273  | 4.950363  | -1.740695 |
| H    | 0.378029  | 4.297196  | 0.257242  |
| C    | 1.039263  | 4.578448  | -3.073552 |
| H    | 1.069939  | 2.934280  | -4.482467 |
| H    | 0.949358  | 5.996344  | -1.441879 |
| H    | 1.296153  | 5.332622  | -3.821815 |
| N    | -6.148593 | 1.256405  | 0.050899  |
| C    | -6.892306 | 1.962205  | -0.972483 |
| H    | -6.679274 | 1.581085  | -1.989367 |
| H    | -7.967805 | 1.844025  | -0.788592 |
| H    | -6.670845 | 3.044946  | -0.971425 |
| C    | -6.855211 | 0.438722  | 1.016769  |
| H    | -6.629658 | 0.737437  | 2.056482  |
| H    | -7.936587 | 0.551029  | 0.866755  |
| H    | -6.609790 | -0.635458 | 0.918890  |
| Pd   | 1.082200  | -0.646966 | -0.576818 |
| C    | -0.871289 | -3.224653 | 2.751978  |

|    |           |           |           |
|----|-----------|-----------|-----------|
| C  | -0.414177 | -2.482913 | 1.682112  |
| C  | -1.116393 | -2.437703 | 0.443510  |
| C  | -2.334736 | -3.202266 | 0.321229  |
| C  | -2.772036 | -3.960356 | 1.446243  |
| C  | -2.065431 | -3.973458 | 2.631706  |
| H  | -0.307980 | -3.240723 | 3.688669  |
| H  | 0.512283  | -1.911516 | 1.767087  |
| C  | -0.657192 | -1.662600 | -0.668830 |
| C  | -3.070728 | -3.182785 | -0.910207 |
| H  | -3.689562 | -4.546424 | 1.367235  |
| H  | -2.425896 | -4.566266 | 3.476761  |
| C  | -2.582489 | -2.417152 | -1.951652 |
| C  | -1.387114 | -1.663923 | -1.838575 |
| H  | -3.127322 | -2.393385 | -2.900625 |
| H  | -1.048135 | -1.095782 | -2.708023 |
| C  | -4.342691 | -3.978864 | -1.071577 |
| H  | -4.175563 | -5.058894 | -0.918974 |
| H  | -5.118455 | -3.672892 | -0.348073 |
| H  | -4.760178 | -3.847892 | -2.080777 |
| Br | 2.152701  | -2.688198 | -1.593314 |
| C  | 3.405811  | 0.215542  | -0.580192 |
| N  | 3.523546  | 1.533764  | -0.556215 |
| N  | 3.611456  | 2.656494  | -0.461207 |
| Si | 4.605823  | -0.731591 | 0.608545  |
| C  | 5.799797  | -1.700647 | -0.476711 |
| H  | 6.377819  | -1.035665 | -1.138873 |
| H  | 6.512474  | -2.268109 | 0.145344  |
| H  | 5.237728  | -2.413216 | -1.100100 |
| C  | 5.531375  | 0.599874  | 1.589627  |
| H  | 6.247367  | 0.118832  | 2.277122  |
| H  | 6.106288  | 1.276097  | 0.935700  |
| H  | 4.855187  | 1.218914  | 2.202427  |
| C  | 3.711653  | -1.873346 | 1.807065  |
| H  | 3.033233  | -1.326715 | 2.480904  |
| H  | 3.127245  | -2.626661 | 1.258584  |
| H  | 4.456511  | -2.393574 | 2.433783  |
| H  | 3.370304  | -0.155614 | -1.614333 |

### 56-ts

B3LYP SCF energy: -4852.88814772 a.u.

B3LYP enthalpy: -4852.194444 a.u.

B3LYP free energy: -4852.327006 a.u.

M06-L SCF energy in solution: -4854.56045872 a.u.

M06-L enthalpy in solution: -4853.866755 a.u.

M06-L free energy in solution: -4853.999317 a.u.

Imaginary frequency: -445.4533 cm<sup>-1</sup>

Cartesian coordinates

| ATOM | X         | Y         | Z         |
|------|-----------|-----------|-----------|
| P    | -0.098410 | 1.322522  | 0.058106  |
| C    | 0.299281  | 1.956198  | 1.752777  |
| C    | 1.437026  | 1.480196  | 2.422757  |
| C    | -0.526116 | 2.892630  | 2.402428  |
| C    | 1.759034  | 1.943878  | 3.702019  |
| H    | 2.063483  | 0.727285  | 1.941703  |
| C    | -0.202080 | 3.357525  | 3.679581  |
| H    | -1.436453 | 3.248143  | 1.915152  |
| C    | 0.942483  | 2.887005  | 4.331306  |
| H    | 2.645709  | 1.557414  | 4.211024  |
| H    | -0.852902 | 4.085002  | 4.171584  |
| H    | 1.190090  | 3.246739  | 5.333282  |
| C    | -1.933109 | 1.321153  | 0.051260  |
| C    | -2.696727 | 2.014156  | -0.900236 |
| C    | -2.625570 | 0.557577  | 1.009445  |
| C    | -4.088924 | 1.956948  | -0.899596 |
| H    | -2.206136 | 2.615892  | -1.667330 |
| C    | -4.012517 | 0.494492  | 1.025079  |
| H    | -2.074459 | -0.009559 | 1.762803  |
| C    | -4.791304 | 1.193242  | 0.065233  |
| H    | -4.628402 | 2.513427  | -1.664805 |
| H    | -4.491457 | -0.118800 | 1.786787  |
| C    | 0.317860  | 2.704576  | -1.105257 |
| C    | 0.553455  | 2.375128  | -2.452145 |
| C    | 0.382425  | 4.051958  | -0.716136 |
| C    | 0.833529  | 3.372378  | -3.390340 |
| H    | 0.527780  | 1.327297  | -2.763902 |
| C    | 0.672347  | 5.047513  | -1.654535 |
| H    | 0.217188  | 4.333183  | 0.325153  |
| C    | 0.895317  | 4.711671  | -2.992780 |
| H    | 1.011421  | 3.099302  | -4.433569 |
| H    | 0.727376  | 6.091152  | -1.334330 |
| H    | 1.122743  | 5.491723  | -3.723897 |
| N    | -6.169348 | 1.129244  | 0.073516  |
| C    | -6.933544 | 1.821770  | -0.943711 |
| H    | -6.708118 | 1.457124  | -1.963930 |
| H    | -8.005057 | 1.668739  | -0.762219 |
| H    | -6.745524 | 2.910806  | -0.932066 |
| C    | -6.851539 | 0.283806  | 1.033209  |
| H    | -6.636009 | 0.582267  | 2.075144  |
| H    | -7.935707 | 0.364041  | 0.882737  |
| H    | -6.573053 | -0.781499 | 0.928244  |
| Pd   | 1.099764  | -0.569312 | -0.573679 |
| C    | -0.891356 | -3.262384 | 2.691848  |
| C    | -0.440485 | -2.485064 | 1.644405  |
| C    | -1.113447 | -2.446907 | 0.388812  |
| C    | -2.295323 | -3.259370 | 0.226775  |
| C    | -2.728943 | -4.053109 | 1.328483  |
| C    | -2.050745 | -4.057003 | 2.530774  |
| H    | -0.350371 | -3.271154 | 3.641860  |

|    |           |           |           |   |           |           |           |
|----|-----------|-----------|-----------|---|-----------|-----------|-----------|
| H  | 0.459848  | -1.877589 | 1.760941  | C | 0.618537  | -2.118622 | 4.265149  |
| C  | -0.649437 | -1.629417 | -0.693729 | H | 1.598652  | -2.553798 | 2.392598  |
| C  | -3.000103 | -3.249718 | -1.023038 | C | -0.433319 | -1.452004 | 4.900955  |
| H  | -3.619585 | -4.674753 | 1.218237  | H | -2.156460 | -0.169278 | 4.633265  |
| H  | -2.406655 | -4.677774 | 3.357634  | H | 1.331876  | -2.702936 | 4.852148  |
| C  | -2.514902 | -2.449607 | -2.039956 | H | -0.544636 | -1.512776 | 5.986617  |
| C  | -1.354708 | -1.650605 | -1.881057 | C | 1.780768  | -1.498421 | -0.051400 |
| H  | -3.036583 | -2.433140 | -3.002340 | C | 2.244089  | -2.558990 | -0.845939 |
| H  | -1.022328 | -1.052118 | -2.734219 | C | 2.744552  | -0.632303 | 0.500062  |
| C  | -4.235572 | -4.091881 | -1.228709 | C | 3.603208  | -2.753972 | -1.083550 |
| H  | -4.030487 | -5.167144 | -1.088447 | H | 1.538163  | -3.259463 | -1.294991 |
| H  | -5.040285 | -3.828291 | -0.520162 | C | 4.102512  | -0.821305 | 0.282457  |
| H  | -4.633166 | -3.960634 | -2.245964 | H | 2.430767  | 0.212958  | 1.115261  |
| Br | 2.320077  | -2.590677 | -1.486310 | C | 4.576794  | -1.888136 | -0.526313 |
| C  | 3.180412  | -0.060859 | -0.665140 | H | 3.901861  | -3.593060 | -1.710374 |
| N  | 3.554604  | 1.767094  | -0.532859 | H | 4.799522  | -0.118261 | 0.735984  |
| N  | 3.457092  | 2.854852  | -0.356064 | C | -0.815209 | -2.729439 | -0.349861 |
| Si | 4.558428  | -0.804289 | 0.499229  | C | -1.132580 | -2.813660 | -1.717127 |
| C  | 5.858894  | -1.718522 | -0.518506 | C | -1.113099 | -3.818880 | 0.483116  |
| H  | 6.321739  | -1.052262 | -1.265625 | C | -1.721471 | -3.966430 | -2.241375 |
| H  | 6.661523  | -2.097000 | 0.137315  | H | -0.921425 | -1.965975 | -2.374122 |
| H  | 5.409918  | -2.569552 | -1.051017 | C | -1.715536 | -4.967735 | -0.041416 |
| C  | 5.446829  | 0.603669  | 1.423453  | H | -0.883343 | -3.775725 | 1.549069  |
| H  | 6.179000  | 0.157510  | 2.118016  | C | -2.018047 | -5.046560 | -1.402810 |
| H  | 6.004032  | 1.271037  | 0.746006  | H | -1.957626 | -4.017448 | -3.307382 |
| H  | 4.761721  | 1.222799  | 2.025327  | H | -1.949671 | -5.804267 | 0.622028  |
| C  | 3.797810  | -1.923898 | 1.813536  | H | -2.488596 | -5.945023 | -1.810247 |
| H  | 3.091439  | -1.375850 | 2.458144  | N | 5.923664  | -2.070133 | -0.758650 |
| H  | 3.259785  | -2.766961 | 1.357198  | C | 6.374305  | -3.160617 | -1.599252 |
| H  | 4.596916  | -2.323592 | 2.461052  | H | 5.977493  | -3.088375 | -2.629247 |
| H  | 3.509424  | -0.042036 | -1.714233 | H | 7.469854  | -3.144636 | -1.661368 |

## 57

B3LYP SCF energy: -4743.48947369 a.u.  
 B3LYP enthalpy: -4742.805256 a.u.  
 B3LYP free energy: -4742.933272 a.u.  
 M06-L SCF energy in solution: -4745.04719301 a.u.  
 M06-L enthalpy in solution: -4744.362975 a.u.  
 M06-L free energy in solution: -4744.490991 a.u.

### Cartesian coordinates

| ATOM | X         | Y         | Z         |
|------|-----------|-----------|-----------|
| P    | 0.001052  | -1.185275 | 0.267452  |
| C    | -0.137999 | -1.286710 | 2.108206  |
| C    | -1.186478 | -0.615716 | 2.756976  |
| C    | 0.768106  | -2.037148 | 2.877650  |
| C    | -1.336230 | -0.700328 | 4.143743  |
| H    | -1.884136 | -0.018122 | 2.167785  |
| C    | 0.618537  | -2.118622 | 4.265149  |
| H    | 1.598652  | -2.553798 | 2.392598  |
| C    | -0.433319 | -1.452004 | 4.900955  |
| H    | -2.156460 | -0.169278 | 4.633265  |
| H    | 1.331876  | -2.702936 | 4.852148  |
| H    | -0.544636 | -1.512776 | 5.986617  |
| C    | 1.780768  | -1.498421 | -0.051400 |
| C    | 2.244089  | -2.558990 | -0.845939 |
| C    | 2.744552  | -0.632303 | 0.500062  |
| C    | 3.603208  | -2.753972 | -1.083550 |
| H    | 1.538163  | -3.259463 | -1.294991 |
| C    | 4.102512  | -0.821305 | 0.282457  |
| H    | 2.430767  | 0.212958  | 1.115261  |
| C    | 4.576794  | -1.888136 | -0.526313 |
| H    | 3.901861  | -3.593060 | -1.710374 |
| H    | 4.799522  | -0.118261 | 0.735984  |
| C    | -0.815209 | -2.729439 | -0.349861 |
| C    | -1.132580 | -2.813660 | -1.717127 |
| C    | -1.113099 | -3.818880 | 0.483116  |
| C    | -1.721471 | -3.966430 | -2.241375 |
| H    | -0.921425 | -1.965975 | -2.374122 |
| C    | -1.715536 | -4.967735 | -0.041416 |
| H    | -0.883343 | -3.775725 | 1.549069  |
| C    | -2.018047 | -5.046560 | -1.402810 |
| H    | -1.957626 | -4.017448 | -3.307382 |
| H    | -1.949671 | -5.804267 | 0.622028  |
| H    | -2.488596 | -5.945023 | -1.810247 |
| N    | 5.923664  | -2.070133 | -0.758650 |
| C    | 6.374305  | -3.160617 | -1.599252 |
| H    | 5.977493  | -3.088375 | -2.629247 |
| H    | 7.469854  | -3.144636 | -1.661368 |
| H    | 6.075765  | -4.146588 | -1.197731 |
| C    | 6.889777  | -1.145309 | -0.199097 |
| H    | 6.862635  | -1.131941 | 0.906020  |
| H    | 7.900308  | -1.446018 | -0.503704 |
| H    | 6.726238  | -0.109161 | -0.548093 |
| Pd   | -0.963304 | 0.673182  | -0.619450 |
| C    | 0.500911  | 3.870368  | 2.528404  |
| C    | 0.247536  | 2.918145  | 1.562330  |
| C    | 1.066978  | 2.776495  | 0.404209  |
| C    | 2.192228  | 3.670218  | 0.259935  |
| C    | 2.424717  | 4.641970  | 1.276861  |
| C    | 1.604490  | 4.743249  | 2.382559  |
| H    | -0.148727 | 3.952176  | 3.403937  |
| H    | -0.605718 | 2.243923  | 1.669425  |
| C    | 0.785320  | 1.780931  | -0.594517 |
| C    | 3.037538  | 3.564601  | -0.895269 |
| H    | 3.270659  | 5.325214  | 1.179005  |
| H    | 1.807035  | 5.499578  | 3.145926  |
| C    | 2.739327  | 2.595023  | -1.834900 |
| C    | 1.638707  | 1.713983  | -1.683784 |

|    |           |           |           |
|----|-----------|-----------|-----------|
| H  | 3.372464  | 2.501406  | -2.723501 |
| H  | 1.477172  | 0.962782  | -2.464201 |
| C  | 4.216420  | 4.487181  | -1.086953 |
| H  | 3.908330  | 5.546034  | -1.135094 |
| H  | 4.945012  | 4.408043  | -0.261405 |
| H  | 4.747508  | 4.254656  | -2.021983 |
| Br | -2.797109 | 2.018437  | -1.922404 |
| C  | -2.951499 | 0.142826  | -1.092396 |
| Si | -4.510315 | 0.032844  | -0.021948 |
| C  | -6.071698 | 0.225433  | -1.081139 |
| H  | -6.114047 | -0.542712 | -1.871307 |
| H  | -6.983750 | 0.126671  | -0.467936 |
| H  | -6.100674 | 1.212313  | -1.571069 |
| C  | -4.529569 | -1.692322 | 0.763414  |
| H  | -5.464630 | -1.840795 | 1.330028  |
| H  | -4.473333 | -2.482657 | -0.002861 |
| H  | -3.687365 | -1.840471 | 1.456832  |
| C  | -4.534798 | 1.364122  | 1.323072  |
| H  | -3.667897 | 1.295727  | 1.999113  |
| H  | -4.529501 | 2.372994  | 0.880653  |
| H  | -5.446369 | 1.269841  | 1.936934  |
| H  | -3.015359 | -0.515909 | -1.973096 |

## 58

B3LYP SCF energy: -4852.92078356 a.u.

B3LYP enthalpy: -4852.224338 a.u.

B3LYP free energy: -4852.357035 a.u.

M06-L SCF energy in solution: -4854.58455891 a.u.

M06-L enthalpy in solution: -4853.888113 a.u.

M06-L free energy in solution: -4854.020810 a.u.

Cartesian coordinates

| ATOM | X         | Y         | Z         |
|------|-----------|-----------|-----------|
| P    | -1.620396 | -0.783925 | -0.364308 |
| C    | -2.219975 | -1.434587 | -1.990578 |
| C    | -1.291796 | -2.023393 | -2.864740 |
| C    | -3.570731 | -1.378298 | -2.370718 |
| C    | -1.709720 | -2.567284 | -4.082992 |
| H    | -0.231795 | -2.034824 | -2.601529 |
| C    | -3.985643 | -1.915121 | -3.592161 |
| H    | -4.304873 | -0.903590 | -1.717107 |
| C    | -3.057146 | -2.514537 | -4.449156 |
| H    | -0.974388 | -3.017613 | -4.754533 |
| H    | -5.039500 | -1.859597 | -3.877466 |
| H    | -3.382692 | -2.930198 | -5.406388 |
| C    | -2.765653 | 0.578765  | 0.090642  |
| C    | -4.047870 | 0.365428  | 0.631766  |
| C    | -2.374775 | 1.912266  | -0.132773 |

|    |           |           |           |
|----|-----------|-----------|-----------|
| C  | -4.898050 | 1.422356  | 0.942831  |
| H  | -4.400215 | -0.649902 | 0.827422  |
| C  | -3.215766 | 2.978310  | 0.169973  |
| H  | -1.399755 | 2.120615  | -0.579530 |
| C  | -4.505599 | 2.768137  | 0.720742  |
| H  | -5.877597 | 1.193138  | 1.360880  |
| H  | -2.858316 | 3.987319  | -0.031324 |
| C  | -2.107159 | -2.145349 | 0.805366  |
| C  | -2.250240 | -1.872727 | 2.180291  |
| C  | -2.216758 | -3.480252 | 0.377432  |
| C  | -2.508362 | -2.899186 | 3.093206  |
| H  | -2.176709 | -0.843366 | 2.539776  |
| C  | -2.468671 | -4.507715 | 1.293284  |
| H  | -2.114288 | -3.721797 | -0.682434 |
| C  | -2.617085 | -4.222574 | 2.653093  |
| H  | -2.629576 | -2.661802 | 4.153542  |
| H  | -2.555951 | -5.537314 | 0.936446  |
| H  | -2.819814 | -5.025551 | 3.366178  |
| N  | -5.340799 | 3.821848  | 1.026443  |
| C  | -6.660496 | 3.570021  | 1.568066  |
| H  | -6.618703 | 3.021854  | 2.527250  |
| H  | -7.167167 | 4.525631  | 1.753783  |
| H  | -7.293746 | 2.982160  | 0.877256  |
| C  | -4.919973 | 5.183391  | 0.759736  |
| H  | -4.718679 | 5.356733  | -0.313613 |
| H  | -5.712939 | 5.876442  | 1.068412  |
| H  | -4.003772 | 5.451902  | 1.316566  |
| Pd | 0.841617  | -0.280408 | -0.403659 |
| C  | 3.286782  | 3.567211  | 0.818101  |
| C  | 2.687578  | 2.404458  | 0.378734  |
| C  | 3.435552  | 1.352099  | -0.223574 |
| C  | 4.855342  | 1.543518  | -0.399963 |
| C  | 5.441123  | 2.753646  | 0.074593  |
| C  | 4.683165  | 3.739426  | 0.673013  |
| H  | 2.682239  | 4.359460  | 1.267641  |
| H  | 1.606193  | 2.280034  | 0.457877  |
| C  | 2.818605  | 0.131373  | -0.661208 |
| C  | 5.638926  | 0.531404  | -1.051356 |
| H  | 6.515057  | 2.907375  | -0.044966 |
| H  | 5.160064  | 4.658864  | 1.023347  |
| C  | 4.993902  | -0.603707 | -1.501653 |
| C  | 3.600944  | -0.800341 | -1.314812 |
| H  | 5.568845  | -1.377403 | -2.020375 |
| H  | 3.157996  | -1.717097 | -1.716776 |
| C  | 7.123559  | 0.706170  | -1.258031 |
| H  | 7.353125  | 1.599464  | -1.863854 |
| H  | 7.663589  | 0.822831  | -0.302513 |
| H  | 7.550985  | -0.164700 | -1.776437 |
| Br | 0.475639  | 1.205737  | -2.371893 |
| C  | 1.261703  | -1.631138 | 1.310327  |
| N  | 2.107419  | -2.570958 | 0.851852  |

|    |           |           |          |
|----|-----------|-----------|----------|
| N  | 2.866455  | -3.294641 | 0.446252 |
| Si | 1.878198  | -0.840039 | 2.981797 |
| C  | 1.500403  | -2.127936 | 4.317164 |
| H  | 2.059063  | -3.063753 | 4.149287 |
| H  | 1.788348  | -1.745655 | 5.311392 |
| H  | 0.427129  | -2.376475 | 4.349827 |
| C  | 3.729572  | -0.533822 | 2.908283 |
| H  | 4.074180  | -0.153177 | 3.884574 |
| H  | 4.288890  | -1.460709 | 2.700371 |
| H  | 3.993019  | 0.205313  | 2.138145 |
| C  | 0.881489  | 0.718970  | 3.307117 |
| H  | 1.125902  | 1.509836  | 2.584033 |
| H  | -0.201413 | 0.526344  | 3.256507 |
| H  | 1.110575  | 1.095320  | 4.318512 |
| H  | 0.291504  | -2.126318 | 1.471727 |

### 59-ts

B3LYP SCF energy: -4852.88978826 a.u.

B3LYP enthalpy: -4852.195868 a.u.

B3LYP free energy: -4852.328666 a.u.

M06-L SCF energy in solution: -4854.55562199 a.u.

M06-L enthalpy in solution: -4853.861702 a.u.

M06-L free energy in solution: -4853.994500 a.u.

Imaginary frequency: -358.3450 cm<sup>-1</sup>

### Cartesian coordinates

| ATOM | X         | Y         | Z         |
|------|-----------|-----------|-----------|
| P    | -1.575913 | -0.828856 | -0.342383 |
| C    | -2.019178 | -1.570826 | -1.977850 |
| C    | -1.041877 | -2.307719 | -2.667135 |
| C    | -3.297025 | -1.440264 | -2.542989 |
| C    | -1.344177 | -2.924520 | -3.883738 |
| H    | -0.030684 | -2.379137 | -2.259744 |
| C    | -3.594815 | -2.050001 | -3.765164 |
| H    | -4.063723 | -0.849265 | -2.039003 |
| C    | -2.622163 | -2.797090 | -4.435530 |
| H    | -0.571693 | -3.490740 | -4.410123 |
| H    | -4.592074 | -1.934047 | -4.197663 |
| H    | -2.856317 | -3.269391 | -5.393142 |
| C    | -2.745517 | 0.553052  | -0.050072 |
| C    | -4.087313 | 0.351707  | 0.327180  |
| C    | -2.316230 | 1.881833  | -0.222703 |
| C    | -4.960692 | 1.416554  | 0.523912  |
| H    | -4.467838 | -0.660407 | 0.482850  |
| C    | -3.178513 | 2.956028  | -0.029185 |
| H    | -1.291600 | 2.079730  | -0.544332 |
| C    | -4.530488 | 2.758453  | 0.350997  |
| H    | -5.986755 | 1.197499  | 0.817043  |

|    |           |           |           |
|----|-----------|-----------|-----------|
| H  | -2.788969 | 3.961279  | -0.184051 |
| C  | -2.157830 | -2.130376 | 0.852920  |
| C  | -2.455092 | -1.781398 | 2.184184  |
| C  | -2.209612 | -3.488190 | 0.493366  |
| C  | -2.803960 | -2.757378 | 3.121399  |
| H  | -2.431923 | -0.732927 | 2.489870  |
| C  | -2.553442 | -4.465252 | 1.434192  |
| H  | -1.990261 | -3.789826 | -0.532589 |
| C  | -2.853209 | -4.105097 | 2.750158  |
| H  | -3.043001 | -2.461271 | 4.146306  |
| H  | -2.593045 | -5.514498 | 1.130081  |
| H  | -3.127248 | -4.868683 | 3.482441  |
| N  | -5.388232 | 3.819828  | 0.544356  |
| C  | -6.770325 | 3.581725  | 0.908517  |
| H  | -6.860741 | 3.040909  | 1.868534  |
| H  | -7.289152 | 4.542469  | 1.017983  |
| H  | -7.310488 | 2.993126  | 0.143587  |
| C  | -4.921635 | 5.177489  | 0.339989  |
| H  | -4.579625 | 5.351229  | -0.696967 |
| H  | -5.740891 | 5.878420  | 0.544370  |
| H  | -4.083947 | 5.434438  | 1.013555  |
| Pd | 0.877781  | -0.334150 | -0.275949 |
| C  | 3.455487  | 3.513008  | 0.681818  |
| C  | 2.823978  | 2.334123  | 0.342432  |
| C  | 3.529212  | 1.240080  | -0.235515 |
| C  | 4.939960  | 1.402051  | -0.491626 |
| C  | 5.561368  | 2.628926  | -0.117755 |
| C  | 4.844205  | 3.658444  | 0.457190  |
| H  | 2.882937  | 4.336838  | 1.116187  |
| H  | 1.748322  | 2.224875  | 0.491243  |
| C  | 2.877826  | 0.005740  | -0.570890 |
| C  | 5.680244  | 0.344034  | -1.121505 |
| H  | 6.629780  | 2.760425  | -0.297696 |
| H  | 5.347409  | 4.590198  | 0.729390  |
| C  | 5.004138  | -0.808392 | -1.467944 |
| C  | 3.621355  | -0.978071 | -1.196716 |
| H  | 5.544953  | -1.618277 | -1.967716 |
| H  | 3.148071  | -1.909832 | -1.521182 |
| C  | 7.153603  | 0.489261  | -1.413076 |
| H  | 7.359964  | 1.346902  | -2.075960 |
| H  | 7.743209  | 0.649152  | -0.493791 |
| H  | 7.545147  | -0.412842 | -1.905727 |
| Br | 0.524061  | 1.039636  | -2.369963 |
| C  | 1.047880  | -1.245796 | 1.481156  |
| N  | 2.503700  | -2.488571 | 1.460494  |
| N  | 3.442870  | -2.895434 | 1.038957  |
| Si | 1.407044  | -0.400910 | 3.187436  |
| C  | 0.977895  | -1.619038 | 4.572151  |
| H  | 1.633879  | -2.504993 | 4.543775  |
| H  | 1.105236  | -1.145522 | 5.560549  |
| H  | -0.063853 | -1.970399 | 4.496553  |

|   |           |           |          |
|---|-----------|-----------|----------|
| C | 3.209909  | 0.116446  | 3.353855 |
| H | 3.346142  | 0.658408  | 4.304981 |
| H | 3.885912  | -0.753385 | 3.370625 |
| H | 3.523014  | 0.779338  | 2.534340 |
| C | 0.266093  | 1.101513  | 3.274050 |
| H | 0.499230  | 1.824547  | 2.478561 |
| H | -0.795603 | 0.826625  | 3.182594 |
| H | 0.400895  | 1.606476  | 4.245586 |
| H | 0.346635  | -2.085343 | 1.615614 |

## 60

B3LYP SCF energy: -4743.55416062 a.u.

B3LYP enthalpy: -4742.867684 a.u.

B3LYP free energy: -4742.994511 a.u.

M06-L SCF energy in solution: -4745.11598262 a.u.

M06-L enthalpy in solution: -4744.429506 a.u.

M06-L free energy in solution: -4744.556333 a.u.

Cartesian coordinates

| ATOM | X         | Y         | Z         |
|------|-----------|-----------|-----------|
| P    | -1.279149 | 0.732323  | 0.483706  |
| C    | -1.704826 | 1.100526  | 2.252415  |
| C    | -0.678049 | 1.444646  | 3.146142  |
| C    | -3.029452 | 1.078211  | 2.716974  |
| C    | -0.972316 | 1.783237  | 4.469911  |
| H    | 0.360412  | 1.423282  | 2.808457  |
| C    | -3.320742 | 1.406701  | 4.043453  |
| H    | -3.843211 | 0.789708  | 2.050347  |
| C    | -2.294101 | 1.765446  | 4.921823  |
| H    | -0.160485 | 2.043942  | 5.153800  |
| H    | -4.356550 | 1.376483  | 4.392246  |
| H    | -2.523441 | 2.019558  | 5.960211  |
| C    | -2.516912 | -0.478874 | -0.118320 |
| C    | -3.859850 | -0.144943 | -0.383531 |
| C    | -2.140646 | -1.822520 | -0.295372 |
| C    | -4.782095 | -1.097826 | -0.803368 |
| H    | -4.204851 | 0.885587  | -0.273498 |
| C    | -3.051982 | -2.785611 | -0.714577 |
| H    | -1.114974 | -2.126366 | -0.075523 |
| C    | -4.404855 | -2.454869 | -0.981493 |
| H    | -5.805556 | -0.777535 | -0.995163 |
| H    | -2.699567 | -3.810072 | -0.827445 |
| C    | -1.752529 | 2.324201  | -0.348628 |
| C    | -2.303117 | 2.345871  | -1.641988 |
| C    | -1.522773 | 3.550020  | 0.301859  |
| C    | -2.637922 | 3.556610  | -2.255977 |
| H    | -2.488846 | 1.411247  | -2.173169 |
| C    | -1.848762 | 4.759507  | -0.317258 |

|    |           |           |           |
|----|-----------|-----------|-----------|
| H  | -1.099568 | 3.563399  | 1.308260  |
| C  | -2.414798 | 4.767957  | -1.595662 |
| H  | -3.074314 | 3.549929  | -3.258077 |
| H  | -1.666966 | 5.700290  | 0.208736  |
| H  | -2.677591 | 5.713677  | -2.075674 |
| N  | -5.311646 | -3.405983 | -1.396937 |
| C  | -6.691092 | -3.038155 | -1.643585 |
| H  | -6.784057 | -2.277649 | -2.440843 |
| H  | -7.253288 | -3.924881 | -1.962734 |
| H  | -7.184964 | -2.634620 | -0.739876 |
| C  | -4.894676 | -4.785334 | -1.558842 |
| H  | -4.520616 | -5.222236 | -0.614915 |
| H  | -5.749791 | -5.387184 | -1.891015 |
| H  | -4.094596 | -4.891661 | -2.314300 |
| Pd | 0.906479  | 0.025990  | 0.372001  |
| C  | 3.309157  | -2.716770 | -2.099382 |
| C  | 2.877298  | -1.454560 | -1.748824 |
| C  | 3.478532  | -0.721973 | -0.685992 |
| C  | 4.555200  | -1.350489 | 0.039452  |
| C  | 4.974811  | -2.654735 | -0.353276 |
| C  | 4.374501  | -3.323736 | -1.397303 |
| H  | 2.818275  | -3.250574 | -2.916575 |
| H  | 2.035175  | -1.021111 | -2.281914 |
| C  | 3.036619  | 0.617201  | -0.313036 |
| C  | 5.176875  | -0.676906 | 1.139703  |
| H  | 5.785648  | -3.138246 | 0.192625  |
| H  | 4.713434  | -4.325138 | -1.674747 |
| C  | 4.712150  | 0.581677  | 1.497052  |
| C  | 3.669737  | 1.204668  | 0.801398  |
| H  | 5.167949  | 1.100451  | 2.344548  |
| H  | 3.347602  | 2.202610  | 1.110079  |
| C  | 6.298820  | -1.316234 | 1.914950  |
| H  | 5.976579  | -2.260078 | 2.385508  |
| H  | 7.158775  | -1.556920 | 1.267611  |
| H  | 6.654853  | -0.649255 | 2.712802  |
| Br | 0.680233  | -1.820419 | 2.078257  |
| C  | 1.915439  | 1.334382  | -0.946462 |
| Si | 1.674976  | 1.622037  | -2.819775 |
| C  | 1.136132  | 3.428863  | -2.996098 |
| H  | 1.918679  | 4.104538  | -2.611198 |
| H  | 0.965965  | 3.686447  | -4.054848 |
| H  | 0.207845  | 3.640431  | -2.444701 |
| C  | 3.326945  | 1.449550  | -3.739259 |
| H  | 3.204722  | 1.759365  | -4.791356 |
| H  | 4.095683  | 2.098301  | -3.287662 |
| H  | 3.713839  | 0.419299  | -3.734444 |
| C  | 0.384997  | 0.523061  | -3.675577 |
| H  | 0.724359  | -0.514761 | -3.818696 |
| H  | -0.556929 | 0.487467  | -3.108329 |
| H  | 0.163207  | 0.933489  | -4.675669 |
| H  | 1.825767  | 2.333652  | -0.492008 |

**61-ts**

B3LYP SCF energy: -2286.82096571 a.u.

B3LYP enthalpy: -2286.065309 a.u.

B3LYP free energy: -2286.196464 a.u.

M06-L SCF energy in solution: -2288.32667100  
a.u.

M06-L enthalpy in solution: -2287.571014 a.u.

M06-L free energy in solution: -2287.702169 a.u.

Imaginary frequency: -438.7240 cm<sup>-1</sup>

## Cartesian coordinates

| ATOM | X        | Y         | Z         |
|------|----------|-----------|-----------|
| P    | 1.898117 | -0.774646 | 0.127562  |
| C    | 2.674016 | -1.507999 | 1.642340  |
| C    | 2.274822 | -2.803279 | 2.022784  |
| C    | 3.580304 | -0.815517 | 2.460647  |
| C    | 2.790052 | -3.399959 | 3.174557  |
| H    | 1.549533 | -3.346062 | 1.409778  |
| C    | 4.086554 | -1.410079 | 3.622652  |
| H    | 3.894455 | 0.194875  | 2.191718  |
| C    | 3.698119 | -2.703059 | 3.980265  |
| H    | 2.473787 | -4.409305 | 3.450681  |
| H    | 4.789935 | -0.855885 | 4.249914  |
| H    | 4.094839 | -3.165802 | 4.887621  |
| C    | 2.629610 | 0.909437  | 0.000305  |
| C    | 3.945535 | 1.159866  | -0.427412 |
| C    | 1.836793 | 2.021673  | 0.331911  |
| C    | 4.453768 | 2.452684  | -0.509163 |
| H    | 4.593083 | 0.327283  | -0.713453 |
| C    | 2.329539 | 3.321756  | 0.260700  |
| H    | 0.800274 | 1.863295  | 0.643959  |
| C    | 3.659242 | 3.577042  | -0.161689 |
| H    | 5.478561 | 2.586831  | -0.853499 |
| H    | 1.665714 | 4.143220  | 0.526870  |
| C    | 2.747966 | -1.682877 | -1.251284 |
| C    | 2.213136 | -1.545435 | -2.545097 |
| C    | 3.886794 | -2.485958 | -1.075881 |
| C    | 2.807943 | -2.181567 | -3.636242 |
| H    | 1.316921 | -0.936484 | -2.695649 |
| C    | 4.476287 | -3.131907 | -2.168696 |
| H    | 4.318257 | -2.613809 | -0.081051 |
| C    | 3.941567 | -2.980326 | -3.450341 |
| H    | 2.378211 | -2.061770 | -4.634168 |
| H    | 5.360343 | -3.756375 | -2.014078 |
| H    | 4.402698 | -3.486812 | -4.302211 |
| N    | 4.157082 | 4.861678  | -0.239565 |
| C    | 5.510072 | 5.090737  | -0.704334 |
| H    | 5.666311 | 4.730029  | -1.738357 |

|    |           |           |           |
|----|-----------|-----------|-----------|
| H  | 5.722653  | 6.167307  | -0.690469 |
| H  | 6.260566  | 4.593152  | -0.062918 |
| C  | 3.312202  | 5.989231  | 0.098945  |
| H  | 2.948249  | 5.937149  | 1.141325  |
| H  | 3.885442  | 6.919056  | -0.007195 |
| H  | 2.425532  | 6.062892  | -0.558364 |
| Pd | -0.466369 | -0.803583 | 0.056103  |
| C  | -2.419594 | 3.551671  | -1.427914 |
| C  | -2.388439 | 2.189422  | -1.164690 |
| C  | -3.440425 | 1.530774  | -0.485391 |
| C  | -4.554716 | 2.319402  | -0.046729 |
| C  | -4.566373 | 3.704722  | -0.337717 |
| C  | -3.522494 | 4.317268  | -1.016254 |
| H  | -1.581223 | 4.024534  | -1.946043 |
| H  | -1.511290 | 1.616200  | -1.467906 |
| C  | -3.425104 | 0.080199  | -0.244716 |
| C  | -5.660735 | 1.696576  | 0.673648  |
| H  | -5.414244 | 4.310467  | -0.014325 |
| H  | -3.557051 | 5.390865  | -1.219612 |
| C  | -5.547983 | 0.385392  | 1.021643  |
| C  | -4.368299 | -0.406602 | 0.728879  |
| H  | -6.357935 | -0.094746 | 1.580810  |
| H  | -4.534600 | -1.484762 | 0.717147  |
| C  | -6.888926 | 2.494623  | 1.031390  |
| H  | -6.653581 | 3.336191  | 1.706095  |
| H  | -7.371504 | 2.929271  | 0.139294  |
| H  | -7.631108 | 1.861172  | 1.538999  |
| C  | -2.492237 | -0.796087 | -0.842246 |
| Si | -2.843128 | -2.623078 | -1.239014 |
| C  | -1.568996 | -3.191857 | -2.522404 |
| H  | -0.543561 | -3.160995 | -2.119749 |
| H  | -1.776430 | -4.226195 | -2.845229 |
| H  | -1.596838 | -2.552477 | -3.420934 |
| C  | -2.765591 | -3.820849 | 0.232403  |
| H  | -1.750065 | -3.860267 | 0.657412  |
| H  | -3.458902 | -3.552135 | 1.045730  |
| H  | -3.031443 | -4.837720 | -0.103857 |
| C  | -4.561100 | -2.791948 | -2.038594 |
| H  | -4.635071 | -2.158290 | -2.937971 |
| H  | -4.745787 | -3.835939 | -2.345128 |
| H  | -5.374155 | -2.492757 | -1.358141 |
| H  | -1.948895 | -0.331882 | -1.686957 |
| C  | -2.023399 | -0.152941 | 2.519504  |
| H  | -1.770228 | 0.903969  | 2.668745  |
| C  | -0.972606 | -1.026785 | 2.238714  |
| H  | -1.178266 | -2.103662 | 2.256553  |
| H  | 0.027825  | -0.746457 | 2.577124  |
| C  | -3.396693 | -0.492546 | 2.543559  |
| H  | -3.634150 | -1.545685 | 2.723603  |
| H  | -4.055075 | 0.204984  | 3.064541  |

## 62

B3LYP SCF energy: -2286.86013761 a.u.

B3LYP enthalpy: -2286.101532 a.u.

B3LYP free energy: -2286.228325 a.u.

M06-L SCF energy in solution: -2288.37064835 a.u.

M06-L enthalpy in solution: -2287.612043 a.u.

M06-L free energy in solution: -2287.738836 a.u.

## Cartesian coordinates

| ATOM | X         | Y         | Z         |
|------|-----------|-----------|-----------|
| P    | -1.427545 | -0.827868 | -0.063835 |
| C    | -2.104741 | -2.019045 | -1.313370 |
| C    | -1.481100 | -3.274356 | -1.450284 |
| C    | -3.141806 | -1.687719 | -2.199610 |
| C    | -1.897693 | -4.178555 | -2.428841 |
| H    | -0.660572 | -3.548893 | -0.782371 |
| C    | -3.550808 | -2.590354 | -3.188636 |
| H    | -3.635208 | -0.717255 | -2.120762 |
| C    | -2.935222 | -3.838344 | -3.304585 |
| H    | -1.404469 | -5.150590 | -2.512877 |
| H    | -4.358975 | -2.312537 | -3.870652 |
| H    | -3.257579 | -4.542853 | -4.075643 |
| C    | -2.638514 | 0.563248  | -0.048615 |
| C    | -3.967203 | 0.417539  | 0.390746  |
| C    | -2.237803 | 1.843325  | -0.463587 |
| C    | -4.858117 | 1.485573  | 0.397240  |
| H    | -4.321557 | -0.554102 | 0.743914  |
| C    | -3.114288 | 2.925993  | -0.461989 |
| H    | -1.204943 | 1.995696  | -0.786687 |
| C    | -4.458256 | 2.777438  | -0.036573 |
| H    | -5.873996 | 1.311812  | 0.750280  |
| H    | -2.741416 | 3.895246  | -0.790631 |
| C    | -1.831356 | -1.648709 | 1.557449  |
| C    | -1.306937 | -1.055130 | 2.719715  |
| C    | -2.631050 | -2.794737 | 1.693136  |
| C    | -1.582855 | -1.582914 | 3.981764  |
| H    | -0.672994 | -0.169143 | 2.631440  |
| C    | -2.896924 | -3.332361 | 2.958482  |
| H    | -3.052549 | -3.276902 | 0.809164  |
| C    | -2.376906 | -2.728672 | 4.105352  |
| H    | -1.168683 | -1.103563 | 4.872740  |
| H    | -3.518395 | -4.227893 | 3.044230  |
| H    | -2.585720 | -3.149684 | 5.092243  |
| N    | -5.337881 | 3.840928  | -0.037364 |
| C    | -6.695602 | 3.663203  | 0.435908  |
| H    | -6.734906 | 3.350440  | 1.496337  |
| H    | -7.239309 | 4.612444  | 0.347531  |
| H    | -7.245910 | 2.906747  | -0.153181 |

|    |           |           |           |
|----|-----------|-----------|-----------|
| C  | -4.889961 | 5.152041  | -0.460935 |
| H  | -4.515539 | 5.146054  | -1.500883 |
| H  | -5.729692 | 5.857101  | -0.413828 |
| H  | -4.080194 | 5.548375  | 0.180290  |
| Pd | 0.765476  | -0.109089 | -0.591333 |
| C  | 1.914917  | 3.539466  | 1.940160  |
| C  | 1.882870  | 2.246772  | 1.416690  |
| C  | 2.913058  | 1.747683  | 0.597460  |
| C  | 4.007664  | 2.606396  | 0.297863  |
| C  | 4.026314  | 3.905773  | 0.840559  |
| C  | 2.995511  | 4.376537  | 1.653029  |
| H  | 1.091303  | 3.891398  | 2.566874  |
| H  | 1.022816  | 1.608346  | 1.625376  |
| C  | 2.890320  | 0.334704  | 0.092591  |
| C  | 5.114690  | 2.125725  | -0.557225 |
| H  | 4.866628  | 4.566109  | 0.621375  |
| H  | 3.035497  | 5.392134  | 2.055107  |
| C  | 5.011300  | 0.935946  | -1.178282 |
| C  | 3.817295  | 0.020817  | -1.108970 |
| H  | 5.833240  | 0.600638  | -1.821112 |
| H  | 4.215920  | -0.995612 | -0.968525 |
| C  | 6.341555  | 2.985141  | -0.732669 |
| H  | 6.099651  | 3.950070  | -1.210609 |
| H  | 6.815834  | 3.220759  | 0.235196  |
| H  | 7.087394  | 2.478590  | -1.362031 |
| C  | 2.363456  | -0.684337 | 0.908275  |
| Si | 2.786237  | -2.528213 | 0.927190  |
| C  | 1.617245  | -3.391476 | 2.137748  |
| H  | 0.568778  | -3.342859 | 1.805692  |
| H  | 1.893040  | -4.454045 | 2.246039  |
| H  | 1.665237  | -2.931307 | 3.138367  |
| C  | 2.678676  | -3.416817 | -0.746898 |
| H  | 1.706140  | -3.247942 | -1.235116 |
| H  | 3.464917  | -3.094305 | -1.447704 |
| H  | 2.801711  | -4.503164 | -0.596208 |
| C  | 4.557574  | -2.739555 | 1.587247  |
| H  | 4.659564  | -2.293098 | 2.590269  |
| H  | 4.822696  | -3.808019 | 1.665649  |
| H  | 5.302336  | -2.255829 | 0.934277  |
| H  | 2.002863  | -0.350352 | 1.890367  |
| C  | 1.765206  | 0.835149  | -2.377684 |
| H  | 1.905928  | 1.895225  | -2.135286 |
| C  | 0.525650  | 0.431066  | -2.830552 |
| H  | 0.384317  | -0.545558 | -3.303996 |
| H  | -0.280156 | 1.155274  | -2.973581 |
| C  | 3.032961  | 0.008212  | -2.462038 |
| H  | 2.763691  | -1.028171 | -2.718932 |
| H  | 3.677674  | 0.377822  | -3.282860 |



**63-ts**

B3LYP SCF energy: -2286.80942569 a.u.  
 B3LYP enthalpy: -2286.053567 a.u.  
 B3LYP free energy: -2286.185064 a.u.  
 M06-L SCF energy in solution: -2288.31630200 a.u.  
 M06-L enthalpy in solution: -2287.560443 a.u.  
 M06-L free energy in solution: -2287.691940 a.u.  
 Imaginary frequency: -301.2849 cm<sup>-1</sup>

## Cartesian coordinates

| ATOM | X         | Y         | Z         |
|------|-----------|-----------|-----------|
| P    | -1.841986 | -0.786882 | 0.016667  |
| C    | -2.746779 | -1.706370 | -1.317487 |
| C    | -2.367743 | -3.037532 | -1.573106 |
| C    | -3.750689 | -1.127017 | -2.109088 |
| C    | -2.995209 | -3.776349 | -2.577677 |
| H    | -1.567402 | -3.493850 | -0.984380 |
| C    | -4.369177 | -1.865137 | -3.125465 |
| H    | -4.053434 | -0.092730 | -1.934507 |
| C    | -3.997853 | -3.190884 | -3.359817 |
| H    | -2.693170 | -4.811517 | -2.757875 |
| H    | -5.147097 | -1.397625 | -3.735132 |
| H    | -4.482631 | -3.766392 | -4.152725 |
| C    | -2.587245 | 0.896953  | -0.010483 |
| C    | -3.831958 | 1.212515  | 0.561679  |
| C    | -1.881705 | 1.941452  | -0.632080 |
| C    | -4.356268 | 2.500958  | 0.507969  |
| H    | -4.410663 | 0.438781  | 1.071647  |
| C    | -2.393144 | 3.234449  | -0.701476 |
| H    | -0.897968 | 1.736322  | -1.063911 |
| C    | -3.652771 | 3.553924  | -0.132732 |
| H    | -5.322212 | 2.687163  | 0.976097  |
| H    | -1.797184 | 4.001458  | -1.194400 |
| C    | -2.557011 | -1.529533 | 1.562838  |
| C    | -1.851833 | -1.350756 | 2.765999  |
| C    | -3.763789 | -2.247945 | 1.589884  |
| C    | -2.347415 | -1.861941 | 3.967577  |
| H    | -0.899799 | -0.812492 | 2.753038  |
| C    | -4.255461 | -2.767651 | 2.792486  |
| H    | -4.323470 | -2.410899 | 0.666368  |
| C    | -3.551523 | -2.573932 | 3.983844  |
| H    | -1.785570 | -1.712591 | 4.893374  |
| H    | -5.194049 | -3.328444 | 2.795277  |
| H    | -3.935670 | -2.982805 | 4.922053  |
| N    | -4.168289 | 4.833135  | -0.192927 |
| C    | -5.442530 | 5.133628  | 0.427145  |
| H    | -5.432069 | 4.954729  | 1.518875  |
| H    | -5.686817 | 6.191129  | 0.264170  |
| H    | -6.265203 | 4.530889  | 0.000508  |
| C    | -3.411773 | 5.891800  | -0.830127 |

|    |           |           |           |
|----|-----------|-----------|-----------|
| H  | -3.200773 | 5.669979  | -1.892208 |
| H  | -3.988560 | 6.824845  | -0.793395 |
| H  | -2.441551 | 6.075390  | -0.331219 |
| Pd | 0.459956  | -0.853218 | -0.128208 |
| C  | 1.679130  | 3.453092  | 1.028121  |
| C  | 1.995345  | 2.136079  | 0.758545  |
| C  | 3.263992  | 1.752986  | 0.238170  |
| C  | 4.222011  | 2.800554  | -0.021253 |
| C  | 3.865124  | 4.146813  | 0.279124  |
| C  | 2.627376  | 4.472320  | 0.793503  |
| H  | 0.688953  | 3.701947  | 1.418475  |
| H  | 1.235230  | 1.371226  | 0.928442  |
| C  | 3.610358  | 0.369905  | -0.037743 |
| C  | 5.508607  | 2.489425  | -0.578737 |
| H  | 4.589629  | 4.941011  | 0.093737  |
| H  | 2.380959  | 5.514567  | 1.013246  |
| C  | 5.790458  | 1.167305  | -0.857831 |
| C  | 4.864143  | 0.136357  | -0.592830 |
| H  | 6.760084  | 0.903530  | -1.290001 |
| H  | 5.159978  | -0.884243 | -0.833984 |
| C  | 6.525699  | 3.566732  | -0.859819 |
| H  | 6.144629  | 4.317876  | -1.572511 |
| H  | 6.811032  | 4.112767  | 0.055568  |
| H  | 7.441720  | 3.135395  | -1.288916 |
| C  | 2.695583  | -0.777512 | 0.244260  |
| Si | 3.411294  | -2.417708 | 0.931227  |
| C  | 4.631757  | -3.353165 | -0.188116 |
| H  | 5.631568  | -2.891509 | -0.202606 |
| H  | 4.754100  | -4.374792 | 0.210653  |
| H  | 4.287108  | -3.449717 | -1.229226 |
| C  | 4.324002  | -2.000005 | 2.541082  |
| H  | 5.155973  | -1.299821 | 2.363013  |
| H  | 3.647173  | -1.536402 | 3.277747  |
| H  | 4.741273  | -2.913601 | 2.998126  |
| C  | 1.982554  | -3.591645 | 1.323385  |
| H  | 1.458368  | -3.904423 | 0.406478  |
| H  | 2.366134  | -4.496580 | 1.825502  |
| H  | 1.239798  | -3.123700 | 1.988657  |
| C  | 2.065566  | -1.111485 | -1.778423 |
| H  | 3.110463  | -1.407306 | -1.888253 |
| H  | 1.935798  | -0.079393 | -2.123987 |
| C  | 1.148816  | -2.081171 | -2.418349 |
| H  | 0.189159  | -1.685931 | -2.767420 |
| C  | 1.418592  | -3.381272 | -2.660275 |
| H  | 2.355321  | -3.849870 | -2.344468 |
| H  | 0.697839  | -4.017227 | -3.180605 |
| H  | 1.991324  | -0.473583 | 1.065388  |

B3LYP SCF energy: -989.31800656 a.u.  
 B3LYP enthalpy: -988.930588 a.u.  
 B3LYP free energy: -989.002339 a.u.  
 M06-L SCF energy in solution: -989.98092189 a.u.  
 M06-L enthalpy in solution: -989.593503 a.u.  
 M06-L free energy in solution: -989.665254 a.u.

Cartesian coordinates

| ATOM | X         | Y         | Z         |
|------|-----------|-----------|-----------|
| C    | -2.637957 | -2.316028 | -1.310031 |
| C    | -1.437959 | -1.661466 | -1.121952 |
| C    | -1.351878 | -0.414742 | -0.434279 |
| C    | -2.581283 | 0.156007  | 0.064349  |
| C    | -3.800885 | -0.550123 | -0.146874 |
| C    | -3.836273 | -1.755921 | -0.814719 |
| H    | -2.659605 | -3.269467 | -1.844121 |
| H    | -0.532675 | -2.122110 | -1.516758 |
| C    | -0.101352 | 0.279925  | -0.226097 |
| C    | -2.567841 | 1.413400  | 0.756058  |
| H    | -4.731712 | -0.123889 | 0.229794  |
| H    | -4.786694 | -2.275266 | -0.961982 |
| C    | -1.353264 | 2.047200  | 0.926711  |
| C    | -0.145999 | 1.489558  | 0.450208  |
| H    | -1.317424 | 3.007724  | 1.448924  |
| H    | 0.777952  | 2.042981  | 0.619954  |
| C    | -3.837887 | 2.032141  | 1.284956  |
| H    | -4.566397 | 2.230044  | 0.480349  |
| H    | -4.341529 | 1.378179  | 2.017040  |
| H    | -3.626600 | 2.988910  | 1.784218  |
| C    | 1.229707  | -0.271102 | -0.711930 |
| Si   | 2.301417  | -0.995790 | 0.724449  |
| C    | 2.641048  | 0.217021  | 2.137558  |
| H    | 1.705071  | 0.564329  | 2.602298  |
| H    | 3.234620  | -0.287760 | 2.918778  |
| H    | 3.207069  | 1.103770  | 1.811452  |
| C    | 1.369041  | -2.483400 | 1.429875  |
| H    | 0.384745  | -2.188381 | 1.827987  |
| H    | 1.201369  | -3.259947 | 0.665489  |
| H    | 1.940861  | -2.943104 | 2.253441  |
| C    | 3.951856  | -1.586575 | -0.000675 |
| H    | 4.573149  | -0.749498 | -0.358522 |
| H    | 4.535779  | -2.126937 | 0.763380  |
| H    | 3.798187  | -2.276492 | -0.847366 |
| C    | 1.973583  | 0.645408  | -1.734964 |
| H    | 1.263590  | 0.939804  | -2.526970 |
| H    | 2.737844  | 0.014931  | -2.226281 |
| C    | 2.673179  | 1.875005  | -1.223724 |
| H    | 3.460409  | 1.710197  | -0.476644 |
| C    | 2.446638  | 3.125370  | -1.638830 |
| H    | 1.675153  | 3.349490  | -2.383300 |

|   |          |           |           |
|---|----------|-----------|-----------|
| H | 3.021149 | 3.971495  | -1.251004 |
| H | 1.031005 | -1.188020 | -1.286287 |

### 65-ts

B3LYP SCF energy: -2286.79784194 a.u.  
 B3LYP enthalpy: -2286.042327 a.u.  
 B3LYP free energy: -2286.170714 a.u.  
 M06-L SCF energy in solution: -2288.30763289 a.u.  
 M06-L enthalpy in solution: -2287.552118 a.u.  
 M06-L free energy in solution: -2287.680505 a.u.  
 Imaginary frequency: -323.6633 cm<sup>-1</sup>

Cartesian coordinates

| ATOM | X        | Y         | Z         |
|------|----------|-----------|-----------|
| P    | 1.397702 | -0.889836 | 0.062255  |
| C    | 1.986989 | -1.849633 | 1.534705  |
| C    | 1.521867 | -3.166215 | 1.718796  |
| C    | 2.780299 | -1.271817 | 2.539382  |
| C    | 1.859491 | -3.889300 | 2.864030  |
| H    | 0.887681 | -3.630515 | 0.959298  |
| C    | 3.108678 | -1.994470 | 3.692127  |
| H    | 3.146184 | -0.249742 | 2.423107  |
| C    | 2.654033 | -3.304637 | 3.857197  |
| H    | 1.493929 | -4.912378 | 2.985376  |
| H    | 3.726147 | -1.527202 | 4.463910  |
| H    | 2.913259 | -3.868554 | 4.756909  |
| C    | 2.538833 | 0.553613  | -0.026659 |
| C    | 3.920187 | 0.436963  | -0.263526 |
| C    | 2.022601 | 1.849818  | 0.136365  |
| C    | 4.749729 | 1.551990  | -0.320048 |
| H    | 4.368964 | -0.547562 | -0.415703 |
| C    | 2.836977 | 2.978283  | 0.083695  |
| H    | 0.948017 | 1.978357  | 0.298594  |
| C    | 4.231545 | 2.862460  | -0.143347 |
| H    | 5.811469 | 1.399235  | -0.510429 |
| H    | 2.375549 | 3.956282  | 0.214166  |
| C    | 1.956585 | -1.944721 | -1.362166 |
| C    | 1.306993 | -1.771383 | -2.595628 |
| C    | 3.014099 | -2.866640 | -1.279650 |
| C    | 1.713754 | -2.489100 | -3.723630 |
| H    | 0.466764 | -1.074653 | -2.657693 |
| C    | 3.414195 | -3.592119 | -2.406619 |
| H    | 3.525614 | -3.030111 | -0.328636 |
| C    | 2.767918 | -3.403461 | -3.631564 |
| H    | 1.197660 | -2.340667 | -4.675836 |
| H    | 4.235651 | -4.309042 | -2.324823 |
| H    | 3.080979 | -3.972170 | -4.511098 |
| N    | 5.049202 | 3.972815  | -0.195887 |

|    |           |           |           |
|----|-----------|-----------|-----------|
| C  | 6.467322  | 3.821130  | -0.449931 |
| H  | 6.671351  | 3.354582  | -1.431950 |
| H  | 6.946431  | 4.808522  | -0.443859 |
| H  | 6.964515  | 3.203168  | 0.320279  |
| C  | 4.484857  | 5.297389  | -0.033442 |
| H  | 3.987035  | 5.419889  | 0.945981  |
| H  | 5.285669  | 6.045229  | -0.096099 |
| H  | 3.739822  | 5.535155  | -0.815598 |
| Pd | -0.819841 | -0.224292 | 0.102261  |
| C  | -2.105604 | 3.834905  | -2.161906 |
| C  | -2.066256 | 2.482167  | -1.836144 |
| C  | -2.793336 | 1.961969  | -0.747498 |
| C  | -3.579288 | 2.858401  | 0.036834  |
| C  | -3.612217 | 4.225389  | -0.319106 |
| C  | -2.887787 | 4.713245  | -1.401207 |
| H  | -1.521967 | 4.207147  | -3.007818 |
| H  | -1.441037 | 1.810174  | -2.425752 |
| C  | -2.793500 | 0.506726  | -0.426431 |
| C  | -4.347216 | 2.353949  | 1.179276  |
| H  | -4.215602 | 4.918293  | 0.269239  |
| H  | -2.927368 | 5.776593  | -1.651098 |
| C  | -4.168058 | 1.063232  | 1.577887  |
| C  | -3.258744 | 0.158333  | 0.913273  |
| H  | -4.712920 | 0.692267  | 2.450683  |
| H  | -3.399711 | -0.902317 | 1.123495  |
| C  | -5.298900 | 3.263851  | 1.910647  |
| H  | -4.775923 | 4.119140  | 2.372924  |
| H  | -6.058874 | 3.687481  | 1.232255  |
| H  | -5.823428 | 2.722311  | 2.711000  |
| C  | -2.464701 | -0.479434 | -1.399862 |
| Si | -3.087997 | -2.259817 | -1.508866 |
| C  | -2.404089 | -3.448140 | -0.200610 |
| H  | -2.585636 | -3.101370 | 0.829040  |
| H  | -2.868967 | -4.443263 | -0.310785 |
| H  | -1.315564 | -3.564973 | -0.322200 |
| C  | -4.985348 | -2.272360 | -1.390232 |
| H  | -5.334331 | -1.887451 | -0.418105 |
| H  | -5.434122 | -1.642030 | -2.175669 |
| H  | -5.382456 | -3.295177 | -1.507889 |
| C  | -2.592269 | -2.909659 | -3.218691 |
| H  | -1.496462 | -2.945838 | -3.331164 |
| H  | -2.977527 | -3.930870 | -3.377782 |
| H  | -2.996077 | -2.271922 | -4.022894 |
| H  | -2.253518 | -0.070802 | -2.395118 |
| C  | -1.586999 | 0.358635  | 2.500696  |
| H  | -1.899169 | 1.396772  | 2.621226  |
| H  | -0.503199 | 0.270133  | 2.337327  |
| C  | -2.112255 | -0.606615 | 3.452443  |
| H  | -3.086709 | -0.362102 | 3.896123  |
| C  | -1.536277 | -1.772277 | 3.817078  |
| H  | -0.572061 | -2.090396 | 3.410077  |

|   |           |           |          |
|---|-----------|-----------|----------|
| H | -2.019983 | -2.439691 | 4.535283 |
|---|-----------|-----------|----------|

## 66

B3LYP SCF energy: -2286.85731869 a.u.

B3LYP enthalpy: -2286.098781 a.u.

B3LYP free energy: -2286.232393 a.u.

M06-L SCF energy in solution: -2288.35511535 a.u.

M06-L enthalpy in solution: -2287.596578 a.u.

M06-L free energy in solution: -2287.730190 a.u.

## Cartesian coordinates

| ATOM | X        | Y         | Z         |
|------|----------|-----------|-----------|
| P    | 1.620667 | -0.810427 | 0.114965  |
| C    | 1.979183 | -1.605971 | 1.753043  |
| C    | 1.039044 | -2.521320 | 2.260802  |
| C    | 3.122006 | -1.318910 | 2.516153  |
| C    | 1.248806 | -3.151359 | 3.489628  |
| H    | 0.131112 | -2.731227 | 1.688962  |
| C    | 3.324866 | -1.941293 | 3.753085  |
| H    | 3.857040 | -0.601181 | 2.146817  |
| C    | 2.392851 | -2.860526 | 4.241215  |
| H    | 0.510461 | -3.864088 | 3.866453  |
| H    | 4.217526 | -1.703155 | 4.337748  |
| H    | 2.552644 | -3.344572 | 5.208232  |
| C    | 2.840569 | 0.561819  | 0.002593  |
| C    | 4.174705 | 0.392349  | -0.405360 |
| C    | 2.431763 | 1.861068  | 0.349385  |
| C    | 5.064970 | 1.461904  | -0.455315 |
| H    | 4.533254 | -0.597051 | -0.699954 |
| C    | 3.309512 | 2.940108  | 0.313142  |
| H    | 1.393213 | 2.033696  | 0.647284  |
| C    | 4.659645 | 2.771701  | -0.089419 |
| H    | 6.085180 | 1.272253  | -0.786960 |
| H    | 2.933620 | 3.923880  | 0.591214  |
| C    | 2.272859 | -2.043759 | -1.106362 |
| C    | 2.011055 | -1.813645 | -2.469709 |
| C    | 3.001186 | -3.186888 | -0.741717 |
| C    | 2.480622 | -2.696278 | -3.443762 |
| H    | 1.427230 | -0.937178 | -2.764168 |
| C    | 3.460813 | -4.077555 | -1.719422 |
| H    | 3.211329 | -3.389835 | 0.310259  |
| C    | 3.205457 | -3.834374 | -3.070654 |
| H    | 2.270742 | -2.500810 | -4.498626 |
| H    | 4.022948 | -4.965719 | -1.418571 |
| H    | 3.564739 | -4.531146 | -3.832434 |
| N    | 5.537320 | 3.836088  | -0.131227 |
| C    | 6.900308 | 3.637160  | -0.580137 |
| H    | 6.950681 | 3.266412  | -1.621188 |

|    |           |           |           |
|----|-----------|-----------|-----------|
| H  | 7.440454  | 4.591622  | -0.539105 |
| H  | 7.446801  | 2.915924  | 0.055098  |
| C  | 5.084504  | 5.165494  | 0.225283  |
| H  | 4.699143  | 5.208967  | 1.260283  |
| H  | 5.924706  | 5.867911  | 0.153780  |
| H  | 4.281876  | 5.530875  | -0.442790 |
| Pd | -0.612521 | -0.248095 | -0.235076 |
| C  | -1.895894 | 4.054567  | -1.447860 |
| C  | -1.798264 | 2.684868  | -1.190839 |
| C  | -2.834218 | 1.984256  | -0.553896 |
| C  | -4.009424 | 2.690995  | -0.170215 |
| C  | -4.092439 | 4.067981  | -0.445918 |
| C  | -3.047609 | 4.749617  | -1.072300 |
| H  | -1.069552 | 4.575902  | -1.938043 |
| H  | -0.893523 | 2.137543  | -1.469857 |
| C  | -2.790449 | 0.503488  | -0.332189 |
| C  | -5.126182 | 1.957123  | 0.467796  |
| H  | -4.990766 | 4.620466  | -0.164498 |
| H  | -3.135621 | 5.821747  | -1.266631 |
| C  | -4.912277 | 0.712251  | 0.941065  |
| C  | -3.556142 | 0.043631  | 0.908301  |
| H  | -5.732946 | 0.171486  | 1.423650  |
| H  | -3.702189 | -1.044793 | 0.847582  |
| C  | -6.473730 | 2.622207  | 0.588745  |
| H  | -6.431354 | 3.514396  | 1.237216  |
| H  | -6.849196 | 2.960727  | -0.391823 |
| H  | -7.214366 | 1.933188  | 1.019952  |
| C  | -2.468903 | -0.359112 | -1.384714 |
| Si | -2.959100 | -2.166089 | -1.698153 |
| C  | -2.485141 | -3.405418 | -0.346552 |
| H  | -2.910166 | -3.155253 | 0.638036  |
| H  | -2.846695 | -4.411477 | -0.621244 |
| H  | -1.389984 | -3.453211 | -0.241792 |
| C  | -4.838575 | -2.239147 | -1.964347 |
| H  | -5.388382 | -1.932147 | -1.059716 |
| H  | -5.148102 | -1.567822 | -2.782297 |
| H  | -5.160904 | -3.261685 | -2.225372 |
| C  | -2.098670 | -2.681737 | -3.303343 |
| H  | -1.002840 | -2.667571 | -3.187097 |
| H  | -2.393393 | -3.703558 | -3.595795 |
| H  | -2.361170 | -2.006973 | -4.135254 |
| H  | -2.194826 | 0.151221  | -2.321118 |
| C  | -2.773287 | 0.312517  | 2.232194  |
| H  | -2.621280 | 1.403195  | 2.321574  |
| H  | -1.773413 | -0.145276 | 2.137266  |
| C  | -3.459119 | -0.204007 | 3.465039  |
| H  | -4.434214 | 0.240546  | 3.703103  |
| C  | -2.971115 | -1.148366 | 4.276397  |
| H  | -1.998143 | -1.616033 | 4.089887  |
| H  | -3.519282 | -1.481396 | 5.162677  |

### 67-ts

B3LYP SCF energy: -5713.16256407 a.u.

B3LYP enthalpy: -5712.325408 a.u.

B3LYP free energy: -5712.484826 a.u.

M06-L SCF energy in solution: -5715.55968557 a.u.

M06-L enthalpy in solution: -5714.722529 a.u.

M06-L free energy in solution: -5714.881947 a.u.

Imaginary frequency: -38.6015 cm<sup>-1</sup>

### Cartesian coordinates

| ATOM | X         | Y         | Z         |
|------|-----------|-----------|-----------|
| P    | 2.084626  | -1.302940 | -0.657804 |
| P    | -3.117155 | -0.261505 | 0.559345  |
| O    | -0.728030 | -1.986625 | 0.144437  |
| C    | 1.541700  | -2.509520 | 0.665544  |
| C    | 2.433903  | -3.245729 | 1.464390  |
| C    | 1.986194  | -4.156505 | 2.424732  |
| C    | 0.615618  | -4.351304 | 2.610384  |
| C    | -0.295617 | -3.638681 | 1.832960  |
| C    | 0.162833  | -2.730833 | 0.868003  |
| C    | -1.706704 | -3.749115 | -1.175817 |
| C    | -1.825097 | -2.550705 | -0.460096 |
| C    | -3.047061 | -1.853309 | -0.400792 |
| C    | -4.140310 | -2.392436 | -1.100046 |
| C    | -4.035777 | -3.589425 | -1.811941 |
| C    | -2.813811 | -4.268284 | -1.845508 |
| C    | 3.929835  | -1.254216 | -0.399737 |
| C    | 4.457522  | -0.818072 | 0.831102  |
| C    | 5.837228  | -0.707410 | 1.020211  |
| C    | 6.720657  | -1.004225 | -0.021707 |
| C    | 6.210087  | -1.416545 | -1.254656 |
| C    | 4.829573  | -1.544540 | -1.440581 |
| C    | 1.990177  | -2.396481 | -2.164132 |
| C    | 2.147728  | -3.792204 | -2.089872 |
| C    | 2.128753  | -4.576060 | -3.246922 |
| C    | 1.956821  | -3.974555 | -4.498320 |
| C    | 1.803271  | -2.588855 | -4.581776 |
| C    | 1.813851  | -1.802582 | -3.423796 |
| C    | -4.542368 | 0.587274  | -0.277973 |
| C    | -4.250511 | 1.232251  | -1.496878 |
| C    | -5.243981 | 1.940746  | -2.176206 |
| C    | -6.536046 | 2.035177  | -1.646527 |
| C    | -6.830041 | 1.410142  | -0.432084 |
| C    | -5.841302 | 0.688572  | 0.247483  |
| C    | -3.889311 | -0.825273 | 2.159762  |
| C    | -3.841554 | 0.089127  | 3.230127  |
| C    | -4.369088 | -0.237686 | 4.482024  |
| C    | -4.935456 | -1.498864 | 4.697666  |

|    |           |           |           |
|----|-----------|-----------|-----------|
| C  | -4.972140 | -2.424064 | 3.650968  |
| C  | -4.457872 | -2.089447 | 2.392844  |
| H  | 3.507065  | -3.110626 | 1.328910  |
| H  | 2.711441  | -4.709614 | 3.026852  |
| H  | 0.251368  | -5.051173 | 3.367294  |
| H  | -5.092344 | -1.857356 | -1.084861 |
| H  | -4.903213 | -3.984826 | -2.346807 |
| H  | -2.712303 | -5.197052 | -2.413496 |
| H  | 3.789319  | -0.559681 | 1.653221  |
| H  | 6.217616  | -0.367878 | 1.987014  |
| H  | 7.800181  | -0.908414 | 0.125365  |
| H  | 6.887525  | -1.646551 | -2.082009 |
| H  | 4.455122  | -1.874992 | -2.410390 |
| H  | 2.293652  | -4.274255 | -1.121006 |
| H  | 2.251289  | -5.660350 | -3.169336 |
| H  | 1.938655  | -4.586870 | -5.404642 |
| H  | 1.655538  | -2.108491 | -5.552701 |
| H  | 1.650448  | -0.726191 | -3.495400 |
| H  | -3.237724 | 1.174161  | -1.913652 |
| H  | -4.998606 | 2.433368  | -3.120987 |
| H  | -7.308613 | 2.600629  | -2.175550 |
| H  | -7.835712 | 1.481301  | -0.006892 |
| H  | -6.088337 | 0.204752  | 1.195121  |
| H  | -3.374595 | 1.066776  | 3.078745  |
| H  | -4.324132 | 0.491085  | 5.296107  |
| H  | -5.338551 | -1.761124 | 5.679855  |
| H  | -5.407614 | -3.414886 | 3.810948  |
| H  | -4.502763 | -2.821405 | 1.583696  |
| H  | -0.737880 | -4.248461 | -1.226370 |
| H  | -1.371061 | -3.764700 | 1.972113  |
| Pd | 1.021061  | 0.928515  | -0.639846 |
| C  | 0.152610  | 0.444409  | 3.923394  |
| C  | 0.544280  | 0.672333  | 2.618701  |
| C  | 1.763528  | 1.340062  | 2.301128  |
| C  | 2.591313  | 1.793755  | 3.395431  |
| C  | 2.156648  | 1.539510  | 4.729872  |
| C  | 0.971455  | 0.881166  | 4.991161  |
| H  | -0.789073 | -0.071537 | 4.128890  |
| H  | -0.084141 | 0.345738  | 1.785870  |
| C  | 2.158196  | 1.550507  | 0.929851  |
| C  | 3.816068  | 2.487594  | 3.117487  |
| H  | 2.774374  | 1.876493  | 5.565522  |
| H  | 0.663595  | 0.700496  | 6.025769  |
| C  | 4.157515  | 2.692201  | 1.792737  |
| C  | 3.350558  | 2.232379  | 0.722669  |
| H  | 5.086689  | 3.224779  | 1.559854  |
| H  | 3.700321  | 2.419153  | -0.296756 |
| Br | -0.616816 | 0.451195  | -2.635012 |
| C  | 4.700601  | 2.992093  | 4.232536  |
| H  | 4.175900  | 3.711662  | 4.886114  |
| H  | 5.056435  | 2.176369  | 4.887317  |

|   |           |          |           |
|---|-----------|----------|-----------|
| H | 5.587835  | 3.501516 | 3.826130  |
| C | 0.968804  | 3.748051 | -1.375497 |
| H | 1.924506  | 4.082039 | -0.949101 |
| C | 0.174140  | 2.869334 | -0.516022 |
| H | -0.858208 | 2.735271 | -0.860906 |
| H | 0.207196  | 3.187134 | 0.534504  |
| C | 0.656363  | 4.189435 | -2.621275 |
| H | -0.252751 | 3.847405 | -3.124571 |
| H | 1.373081  | 4.769624 | -3.208937 |
| B | -0.497827 | 6.301476 | -1.549025 |
| F | -1.694874 | 5.738416 | -1.504444 |
| F | 0.165234  | 6.510375 | -0.419254 |
| F | -0.164048 | 7.023463 | -2.616974 |

## 68

B3LYP SCF energy: -5388.83565713 a.u.

B3LYP enthalpy: -5388.016423 a.u.

B3LYP free energy: -5388.162893 a.u.

M06-L SCF energy in solution: -5390.93519594 a.u.

M06-L enthalpy in solution: -5390.115962 a.u.

M06-L free energy in solution: -5390.262432 a.u.

## Cartesian coordinates

| ATOM | X         | Y         | Z         |
|------|-----------|-----------|-----------|
| P    | -2.027678 | -1.148165 | -0.386305 |
| P    | 3.149655  | 0.530252  | -0.000783 |
| O    | 0.824207  | -0.823752 | -1.272599 |
| C    | -1.411118 | -0.728873 | -2.103732 |
| C    | -2.256906 | -0.499261 | -3.202903 |
| C    | -1.753610 | -0.214846 | -4.475137 |
| C    | -0.372868 | -0.151091 | -4.676913 |
| C    | 0.493309  | -0.373866 | -3.607677 |
| C    | -0.020761 | -0.662440 | -2.336122 |
| C    | 1.852955  | -2.904049 | -1.917658 |
| C    | 1.933779  | -1.629173 | -1.342180 |
| C    | 3.128947  | -1.168795 | -0.756332 |
| C    | 4.231631  | -2.039928 | -0.750607 |
| C    | 4.164057  | -3.310068 | -1.327048 |
| C    | 2.969239  | -3.738767 | -1.913560 |
| C    | -3.867988 | -0.928377 | -0.586604 |
| C    | -4.387314 | 0.342443  | -0.901838 |
| C    | -5.765648 | 0.551176  | -0.991019 |
| C    | -6.657750 | -0.496615 | -0.743782 |
| C    | -6.156710 | -1.757289 | -0.411044 |
| C    | -4.776412 | -1.972191 | -0.337107 |
| C    | -1.912302 | -3.007346 | -0.431284 |
| C    | -1.955149 | -3.744355 | -1.627832 |
| C    | -1.925362 | -5.142135 | -1.607706 |

|    |           |           |           |
|----|-----------|-----------|-----------|
| C  | -1.857473 | -5.824235 | -0.388322 |
| C  | -1.816068 | -5.100160 | 0.805601  |
| C  | -1.835661 | -3.701061 | 0.787392  |
| C  | 4.499967  | 0.334439  | 1.261616  |
| C  | 4.147769  | -0.329365 | 2.454454  |
| C  | 5.081106  | -0.472207 | 3.483507  |
| C  | 6.370080  | 0.057858  | 3.352497  |
| C  | 6.722698  | 0.728347  | 2.178684  |
| C  | 5.795426  | 0.863796  | 1.138372  |
| C  | 4.006989  | 1.521577  | -1.327825 |
| C  | 3.918589  | 2.922488  | -1.212220 |
| C  | 4.500945  | 3.763392  | -2.164225 |
| C  | 5.166108  | 3.218891  | -3.268053 |
| C  | 5.247028  | 1.830408  | -3.405899 |
| C  | 4.675707  | 0.989577  | -2.443724 |
| H  | -3.336965 | -0.551936 | -3.063176 |
| H  | -2.443578 | -0.042219 | -5.305056 |
| H  | 0.034092  | 0.082114  | -5.664575 |
| H  | 5.160494  | -1.711731 | -0.278779 |
| H  | 5.037830  | -3.966662 | -1.307674 |
| H  | 2.895557  | -4.737943 | -2.351519 |
| H  | -3.712116 | 1.179725  | -1.081140 |
| H  | -6.139675 | 1.547928  | -1.238719 |
| H  | -7.736887 | -0.329094 | -0.804486 |
| H  | -6.841399 | -2.586261 | -0.209751 |
| H  | -4.408486 | -2.966796 | -0.081460 |
| H  | -2.021538 | -3.225982 | -2.586734 |
| H  | -1.958946 | -5.698881 | -2.548838 |
| H  | -1.831873 | -6.917763 | -0.370923 |
| H  | -1.748047 | -5.622000 | 1.763919  |
| H  | -1.758506 | -3.142603 | 1.721448  |
| H  | 3.136549  | -0.738334 | 2.572034  |
| H  | 4.790619  | -0.993451 | 4.399853  |
| H  | 7.094881  | -0.047444 | 4.165060  |
| H  | 7.726754  | 1.148494  | 2.066052  |
| H  | 6.087942  | 1.387233  | 0.225364  |
| H  | 3.375423  | 3.356398  | -0.367451 |
| H  | 4.421614  | 4.848146  | -2.050339 |
| H  | 5.612315  | 3.874598  | -4.021046 |
| H  | 5.760682  | 1.394884  | -4.268120 |
| H  | 4.753785  | -0.093175 | -2.562306 |
| H  | 0.903208  | -3.242563 | -2.334499 |
| H  | 1.575496  | -0.313158 | -3.738490 |
| Pd | -1.047668 | 0.129608  | 1.492316  |
| C  | -0.104864 | 3.740582  | -1.341291 |
| C  | -0.520213 | 2.756169  | -0.465868 |
| C  | -1.767367 | 2.831826  | 0.221535  |
| C  | -2.600098 | 3.989622  | -0.015263 |
| C  | -2.140815 | 4.985320  | -0.927689 |
| C  | -0.927536 | 4.867455  | -1.576129 |
| H  | 0.857924  | 3.648188  | -1.851165 |

|    |           |           |           |
|----|-----------|-----------|-----------|
| H  | 0.110184  | 1.884722  | -0.269609 |
| C  | -2.180341 | 1.783501  | 1.123225  |
| C  | -3.853680 | 4.113459  | 0.670821  |
| H  | -2.762799 | 5.863614  | -1.115582 |
| H  | -0.601422 | 5.647844  | -2.270920 |
| C  | -4.214901 | 3.102522  | 1.543881  |
| C  | -3.400290 | 1.964890  | 1.764834  |
| H  | -5.166723 | 3.181215  | 2.082172  |
| H  | -3.761666 | 1.206834  | 2.465853  |
| Br | 0.572598  | -1.811273 | 2.246542  |
| C  | -4.748001 | 5.311874  | 0.460474  |
| H  | -4.251803 | 6.258087  | 0.742138  |
| H  | -5.058581 | 5.424207  | -0.593949 |
| H  | -5.662850 | 5.225958  | 1.066977  |
| C  | -1.072521 | 1.201773  | 4.265642  |
| H  | -1.990290 | 1.806783  | 4.261805  |
| C  | -0.240098 | 1.306143  | 3.052367  |
| H  | 0.763925  | 0.885948  | 3.189659  |
| H  | -0.178184 | 2.342541  | 2.690751  |
| C  | -0.828047 | 0.449053  | 5.356146  |
| H  | 0.054595  | -0.196011 | 5.414261  |
| H  | -1.523808 | 0.427340  | 6.201798  |

### 69-ts

B3LYP SCF energy: -3254.60454383 a.u.

B3LYP enthalpy: -3253.713996 a.u.

B3LYP free energy: -3253.866183 a.u.

M06-L SCF energy in solution: -3256.79226578 a.u.

M06-L enthalpy in solution: -3255.901718 a.u.

M06-L free energy in solution: -3256.053905 a.u.

Imaginary frequency: -265.8837 cm<sup>-1</sup>

### Cartesian coordinates

| ATOM | X         | Y         | Z         |
|------|-----------|-----------|-----------|
| P    | 0.565082  | 1.940018  | -0.069634 |
| P    | -2.318071 | -0.614310 | 0.072841  |
| O    | -2.100636 | 1.704160  | -1.468101 |
| C    | -0.063781 | 2.962511  | -1.492373 |
| C    | 0.690962  | 3.989545  | -2.089134 |
| C    | 0.207109  | 4.697723  | -3.192430 |
| C    | -1.041536 | 4.386786  | -3.735518 |
| C    | -1.818538 | 3.384300  | -3.152206 |
| C    | -1.338711 | 2.703180  | -2.031876 |
| C    | -3.762551 | 3.172883  | -0.428285 |
| C    | -3.068896 | 1.965804  | -0.525154 |
| C    | -3.344295 | 0.889873  | 0.337587  |
| C    | -4.356582 | 1.040662  | 1.295925  |
| C    | -5.063666 | 2.242335  | 1.398569  |

|   |           |           |           |
|---|-----------|-----------|-----------|
| C | -4.760907 | 3.303363  | 0.541787  |
| C | 2.315592  | 2.513381  | 0.093374  |
| C | 3.202814  | 2.353018  | -0.987101 |
| C | 4.532289  | 2.762497  | -0.880554 |
| C | 5.002653  | 3.324655  | 0.310751  |
| C | 4.132361  | 3.480121  | 1.390819  |
| C | 2.796090  | 3.080257  | 1.284859  |
| C | -0.239445 | 2.676311  | 1.419553  |
| C | -0.654983 | 4.017367  | 1.456300  |
| C | -1.179248 | 4.561428  | 2.631817  |
| C | -1.286198 | 3.778025  | 3.784916  |
| C | -0.868931 | 2.444111  | 3.759428  |
| C | -0.353522 | 1.895656  | 2.581566  |
| C | -2.846439 | -1.753330 | 1.429869  |
| C | -2.560107 | -1.379707 | 2.758233  |
| C | -2.872251 | -2.229038 | 3.821620  |
| C | -3.459994 | -3.475715 | 3.577426  |
| C | -3.735902 | -3.862617 | 2.264589  |
| C | -3.433551 | -3.008770 | 1.196569  |
| C | -3.059128 | -1.309117 | -1.470301 |
| C | -2.234851 | -1.613039 | -2.564364 |
| C | -2.784379 | -2.096209 | -3.756918 |
| C | -4.165094 | -2.275769 | -3.868385 |
| C | -4.997241 | -1.962856 | -2.787354 |
| C | -4.450303 | -1.476809 | -1.598230 |
| H | 1.673501  | 4.242193  | -1.691703 |
| H | 0.816522  | 5.490449  | -3.631789 |
| H | -1.413925 | 4.924308  | -4.610606 |
| H | -4.595034 | 0.217634  | 1.971526  |
| H | -5.850852 | 2.347203  | 2.148095  |
| H | -5.310012 | 4.244695  | 0.620347  |
| H | 2.859519  | 1.909200  | -1.922161 |
| H | 5.204263  | 2.635558  | -1.732509 |
| H | 6.045179  | 3.640713  | 0.395212  |
| H | 4.489477  | 3.918790  | 2.325606  |
| H | 2.134105  | 3.217354  | 2.140293  |
| H | -0.566373 | 4.644736  | 0.567051  |
| H | -1.501152 | 5.605486  | 2.647588  |
| H | -1.692332 | 4.207882  | 4.703707  |
| H | -0.943451 | 1.829316  | 4.659867  |
| H | -0.026643 | 0.852688  | 2.566688  |
| H | -2.100889 | -0.410162 | 2.965430  |
| H | -2.655975 | -1.916939 | 4.846378  |
| H | -3.702814 | -4.140801 | 4.409537  |
| H | -4.196166 | -4.833185 | 2.063975  |
| H | -3.667301 | -3.326988 | 0.179223  |
| H | -1.156236 | -1.452058 | -2.491165 |
| H | -2.130927 | -2.323526 | -4.602675 |
| H | -4.595894 | -2.650613 | -4.800016 |
| H | -6.079027 | -2.090775 | -2.873384 |
| H | -5.113971 | -1.219864 | -0.769274 |

|    |           |           |           |
|----|-----------|-----------|-----------|
| H  | -3.530531 | 3.999073  | -1.100891 |
| H  | -2.797726 | 3.116948  | -3.554036 |
| Pd | 0.227989  | -0.566630 | -0.130500 |
| C  | 3.945136  | -0.739869 | 2.837855  |
| C  | 2.959640  | -0.680873 | 1.874609  |
| C  | 3.251828  | -0.799912 | 0.485720  |
| C  | 4.632541  | -0.960808 | 0.095627  |
| C  | 5.623716  | -1.020110 | 1.117473  |
| C  | 5.294481  | -0.918266 | 2.453413  |
| H  | 3.687843  | -0.643844 | 3.895722  |
| H  | 1.919013  | -0.529182 | 2.168863  |
| C  | 2.231349  | -0.755580 | -0.518275 |
| C  | 4.978542  | -1.057321 | -1.295602 |
| H  | 6.670194  | -1.147661 | 0.836956  |
| H  | 6.076463  | -0.968366 | 3.214993  |
| C  | 3.960229  | -0.995694 | -2.228934 |
| C  | 2.600469  | -0.855146 | -1.846267 |
| H  | 4.203198  | -1.064576 | -3.293497 |
| H  | 1.846748  | -0.817314 | -2.638595 |
| C  | 6.412651  | -1.223506 | -1.733050 |
| H  | 7.044434  | -0.385193 | -1.394919 |
| H  | 6.862133  | -2.144486 | -1.325556 |
| H  | 6.485832  | -1.275203 | -2.828700 |
| N  | 0.538693  | -3.041915 | 1.837489  |
| N  | 0.811127  | -3.158990 | 2.898579  |
| C  | 0.132587  | -2.603943 | -0.083843 |
| Si | 1.052386  | -4.138181 | -0.867027 |
| C  | 0.166029  | -5.676243 | -0.216023 |
| H  | -0.916707 | -5.648805 | -0.420635 |
| H  | 0.571994  | -6.575693 | -0.709152 |
| H  | 0.303561  | -5.814248 | 0.868856  |
| C  | 0.719129  | -3.979690 | -2.719280 |
| H  | -0.358170 | -3.962624 | -2.944435 |
| H  | 1.189836  | -3.087556 | -3.155954 |
| H  | 1.148747  | -4.866285 | -3.216181 |
| C  | 2.880019  | -4.251847 | -0.463175 |
| H  | 3.065386  | -4.233680 | 0.622113  |
| H  | 3.259734  | -5.214184 | -0.846360 |
| H  | 3.463509  | -3.443946 | -0.924211 |
| H  | -0.891892 | -2.953552 | 0.132246  |

## 70

B3LYP SCF energy: -3145.29493242 a.u.

B3LYP enthalpy: -3144.411710 a.u.

B3LYP free energy: -3144.555958 a.u.

M06-L SCF energy in solution: -3147.37103813 a.u.

M06-L enthalpy in solution: -3146.487816 a.u.

M06-L free energy in solution: -3146.632064 a.u.

| Cartesian coordinates |           |           |           | H  | 6.517529  | -0.543768 | -1.116743 |
|-----------------------|-----------|-----------|-----------|----|-----------|-----------|-----------|
| ATOM                  | X         | Y         | Z         | H  | 4.682630  | 0.187012  | 0.376059  |
| P                     | 1.840057  | 1.054481  | -0.196774 | H  | 3.471657  | 2.847009  | 1.597873  |
| P                     | -2.001558 | 0.720034  | 0.375977  | H  | 4.293352  | 2.561983  | 3.913772  |
| O                     | -0.401534 | 3.037790  | 0.168207  | H  | 3.751609  | 0.492279  | 5.195104  |
| C                     | 1.867261  | 2.877768  | -0.555924 | H  | 2.368355  | -1.295627 | 4.135514  |
| C                     | 2.991224  | 3.523002  | -1.104343 | H  | 1.529716  | -1.012820 | 1.821007  |
| C                     | 2.977209  | 4.894586  | -1.369800 | H  | -1.809048 | -1.387492 | 2.372187  |
| C                     | 1.831179  | 5.649991  | -1.105823 | H  | -3.443334 | -2.916946 | 3.421567  |
| C                     | 0.700963  | 5.032076  | -0.567817 | H  | -5.842067 | -2.864017 | 2.725707  |
| C                     | 0.733301  | 3.664166  | -0.288109 | H  | -6.582261 | -1.251007 | 0.972241  |
| C                     | -0.251979 | 3.769156  | 2.492397  | H  | -4.966839 | 0.308470  | -0.052298 |
| C                     | -0.707032 | 2.903341  | 1.497282  | H  | -1.786829 | 1.193708  | -2.508322 |
| C                     | -1.568327 | 1.828390  | 1.789467  | H  | -2.970035 | 2.717017  | -4.077599 |
| C                     | -1.997952 | 1.664159  | 3.114776  | H  | -4.745012 | 4.249329  | -3.227257 |
| C                     | -1.557549 | 2.530830  | 4.119643  | H  | -5.323491 | 4.252355  | -0.800766 |
| C                     | -0.679916 | 3.572013  | 3.808319  | H  | -4.148010 | 2.735706  | 0.763599  |
| C                     | 3.265050  | 0.498004  | -1.235540 | H  | 0.420876  | 4.589824  | 2.240362  |
| C                     | 3.074923  | 0.432394  | -2.628300 | H  | -0.216049 | 5.590873  | -0.371484 |
| C                     | 4.112198  | 0.023707  | -3.468374 | Pd | -0.129418 | -0.457027 | -0.533132 |
| C                     | 5.353764  | -0.333098 | -2.927157 | C  | -0.536336 | -5.029178 | 2.293456  |
| C                     | 5.549599  | -0.272076 | -1.545339 | C  | -0.775018 | -4.183578 | 1.222468  |
| C                     | 4.511814  | 0.142362  | -0.700988 | C  | 0.285791  | -3.647649 | 0.453965  |
| C                     | 2.451083  | 0.931032  | 1.540024  | C  | 1.630072  | -4.022525 | 0.781617  |
| C                     | 3.227175  | 1.934410  | 2.145098  | C  | 1.842111  | -4.884409 | 1.889255  |
| C                     | 3.691728  | 1.774339  | 3.453566  | C  | 0.784422  | -5.375504 | 2.635027  |
| C                     | 3.388352  | 0.613595  | 4.171652  | H  | -1.374093 | -5.434969 | 2.865466  |
| C                     | 2.613806  | -0.387990 | 3.578825  | H  | -1.804464 | -3.939384 | 0.961219  |
| C                     | 2.142926  | -0.228575 | 2.272833  | C  | 0.037637  | -2.776120 | -0.694594 |
| C                     | -3.272831 | -0.404925 | 1.102521  | C  | 2.741214  | -3.552209 | -0.022987 |
| C                     | -2.859416 | -1.337207 | 2.073324  | H  | 2.858617  | -5.176566 | 2.154070  |
| C                     | -3.779072 | -2.208783 | 2.660017  | H  | 0.974812  | -6.042798 | 3.478936  |
| C                     | -5.122692 | -2.179735 | 2.269625  | C  | 2.484202  | -2.738414 | -1.099834 |
| C                     | -5.537083 | -1.275115 | 1.289905  | C  | 1.160930  | -2.337715 | -1.441144 |
| C                     | -4.620755 | -0.389973 | 0.710152  | H  | 3.307602  | -2.404400 | -1.732225 |
| C                     | -2.907292 | 1.834737  | -0.775857 | H  | 1.007065  | -1.843482 | -2.402074 |
| C                     | -2.577348 | 1.849792  | -2.138194 | C  | 4.151879  | -3.970633 | 0.296253  |
| C                     | -3.236850 | 2.713205  | -3.018060 | H  | 4.449203  | -3.651562 | 1.309271  |
| C                     | -4.229154 | 3.573522  | -2.540850 | H  | 4.270136  | -5.066152 | 0.258230  |
| C                     | -4.554760 | 3.574645  | -1.179988 | H  | 4.861327  | -3.529122 | -0.416736 |
| C                     | -3.895066 | 2.714499  | -0.299137 | C  | -1.247871 | -2.206723 | -1.040634 |
| H                     | 3.888873  | 2.947317  | -1.333491 | Si | -1.982826 | -2.322120 | -2.813781 |
| H                     | 3.863768  | 5.371257  | -1.793754 | C  | -2.009402 | -4.167176 | -3.231451 |
| H                     | 1.812592  | 6.719715  | -1.326749 | H  | -2.587711 | -4.742354 | -2.490148 |
| H                     | -2.683002 | 0.855517  | 3.370792  | H  | -2.477864 | -4.328911 | -4.216958 |
| H                     | -1.902354 | 2.389515  | 5.146017  | H  | -0.992741 | -4.590907 | -3.267974 |
| H                     | -0.329561 | 4.247218  | 4.592592  | C  | -3.754523 | -1.677501 | -2.776426 |
| H                     | 2.110126  | 0.709358  | -3.063632 | H  | -4.344460 | -2.176612 | -1.990854 |
| H                     | 3.953049  | -0.016239 | -4.548744 | H  | -3.812426 | -0.591773 | -2.607995 |
| H                     | 6.166053  | -0.653889 | -3.583761 | H  | -4.241930 | -1.890894 | -3.742418 |
|                       |           |           |           | C  | -0.990695 | -1.413219 | -4.147500 |



H -0.022345 -1.897394 -4.351552  
H -1.561564 -1.431557 -5.091147

H -0.799947 -0.357340 -3.898149  
H -2.041318 -2.432735 -0.319253
